# Supplementary material for: Synthesis of dinucleoside acylphosphonites by phosphonodiamidite chemistry and investigation of phosphorus epimerization
Source: publisher site journal article supplement (doi:10.3762/bjoc.11.19), 2015-01-30
Supplement: Additional file 1 [file 1860-5397-11-19-S1.pdf]

## Supporting Information

for

# Synthesis of dinucleoside acylphosphonites by phosphonodiamidite chemistry and investigation of phosphorus epimerization

William H. Hersh\*

Address: Department of Chemistry and Biochemistry, Queens College and the Graduate Center of the City University of New York, Queens, NY 11367-1597, USA

Email: William H. Hersh - [william.hersh@qc.cuny.edu](mailto:william.hersh@qc.cuny.edu)

\*Corresponding author

### Experimental

#### Table of Contents

|                                                                                                    |     |
|----------------------------------------------------------------------------------------------------|-----|
| <b>General Methods</b>                                                                             | S2  |
| <b>(iPr<sub>2</sub>N)<sub>2</sub>PC(O)CH<sub>3</sub> (7).</b>                                      | S2  |
| <b>(iPr<sub>2</sub>N)<sub>2</sub>PC(=CH<sub>2</sub>)OC(O)CH<sub>3</sub> (8).</b>                   | S3  |
| <b>(iPr<sub>2</sub>N)<sub>2</sub>PC(O)C<sub>6</sub>H<sub>5</sub> (9).</b>                          | S4  |
| <b>3'-(5'-DMTr-OT)P(N(iPr)<sub>2</sub>)C(O)CH<sub>3</sub> (10).</b>                                | S5  |
| <b>3'-(5'-DMTr-OT)P(N(iPr)<sub>2</sub>)C(O)C<sub>6</sub>H<sub>5</sub> (11).</b>                    | S8  |
| <b>3'-(5'-DMTr-OT)-5'-(3'-<i>t</i>-BuMe<sub>2</sub>Si-OT)PC(O)CH<sub>3</sub> (12).</b>             | S9  |
| <b>3'-(5'-DMTr-OT)-5'-(3'-<i>t</i>-BuMe<sub>2</sub>Si-OT)PC(O)C<sub>6</sub>H<sub>5</sub> (13).</b> | S11 |
| <b>Conversion of 12 and 13 to 17.</b>                                                              | S12 |
| <b>Thermal decomposition of 12 and 13.</b>                                                         | S13 |
| <b>X-ray structure of 9.</b>                                                                       | S14 |
| <b>Calculations.</b>                                                                               | S15 |
| <b>References.</b>                                                                                 | S16 |
| <b><sup>1</sup>H, <sup>13</sup>C, <sup>31</sup>P, COSY90, HETCOR, HSQC, and IR spectra.</b>        | S17 |
| <b>XYZ coordinates from DFT optimization of 7.</b>                                                 | S58 |
| <b>XYZ coordinates from DFT optimization of 8.</b>                                                 | S59 |
| <b>XYZ coordinates from DFT optimization of 18.</b>                                                | S60 |
| <b>XYZ coordinates from DFT optimization of 19.</b>                                                | S62 |
| <b>XYZ coordinates from DFT optimization of 20.</b>                                                | S63 |
| <b>XYZ coordinates from DFT optimization of 21.</b>                                                | S65 |

## Experimental

**General methods.** All reactions and sample analysis preparations were carried out in an inert-atmosphere glovebox with recirculating nitrogen, using oven-dried glassware. NMR spectra were recorded on 400 and 500 MHz Bruker spectrometers referenced to  $\text{CDCl}_3$  solvent peaks [1,2] and for  $^{31}\text{P}$  NMR to external  $\text{PPh}_3$  at -5.25 ppm. Peak assignments were made where possible using 2D COSY and HETCOR or HSQC spectra, with  $^{13}\text{C}$ - $^1\text{H}$  correlations shown in the spectral data where needed, as well as by comparison to the thymidine starting materials. Reaction solvents were distilled under nitrogen and then dried over activated 3 Å molecular sieves [3]. Column chromatography was carried out in the glovebox on 230-400 mesh silica gel that had been dried several hours at 250 °C under vacuum. For the peak assignments in the  $^1\text{H}$  NMR spectra of **12** and **13**, the 3'-phosphorylated thymidine and the 5'-phosphorylated thymidine are labeled T1 and T2, respectively.

**(iPr<sub>2</sub>N)<sub>2</sub>PC(O)CH<sub>3</sub> (7).** The starting material (iPr<sub>2</sub>N)<sub>2</sub>PH (**4**) was prepared via a modification of the literature procedure [4]. In the glovebox, powdered  $\text{LiAlH}_4$  (0.242 g, 6.37 mmol, 1.17 equiv) was added in one portion to 1.451 g (5.44 mmol) of (iPr<sub>2</sub>N)<sub>2</sub>PCl [**5**] in 10 mL of THF, and the suspension was stirred vigorously for two hours; while it was stoppered, the stopper was removed periodically to release pressure. The grey suspension was filtered through a layer of dry Celite (*CAUTION: the grey solid smokes and occasionally briefly ignites when removed from the glovebox*), and the solvent was then removed from the yellow solution using a vacuum pump. The resultant white solid suspended in a yellow oil was extracted with 7 × ~8 mL of hexanes, filtering each 8 mL extract through dried Celite. Solvent removal using a vacuum pump gave 1.16 g (5.00

mmol, 92% yield) of **4** as a white solid suspended in a clear oil, which on the basis of  $^1\text{H}$  and  $^{31}\text{P}$  NMR was ~93% pure. This material could be stored cold in the glovebox at  $-35\text{ }^\circ\text{C}$  but was typically used immediately.

A sample of **4** (0.311 g, 1.34 mmol) was suspended in 7 mL  $\text{CH}_2\text{Cl}_2$ , the flask was fitted with a dropping funnel containing a solution of 0.119 g of  $\text{CH}_3\text{C}(\text{O})\text{Cl}$  (1.52 mmol, 1.13 equiv) in 3 mL of  $\text{CH}_2\text{Cl}_2$ , and the dropping funnel was then attached to a solenoid-controlled vacuum valve. The acetyl chloride solution was added dropwise over ~1 min, while periodically opening the reaction to vacuum in order to keep the reaction under partial vacuum. Gentle bubbling of the solution occurred, presumably due to release of HCl gas, giving a yellow solution. Solvent removal gave a yellow solid that was then extracted with  $3 \times 5$  mL of hexanes (the last extract was clear), filtering each extract through Celite. Final solvent removal gave 0.234 g (0.852 mmol, 64% yield) of **7** as a yellow oil at room temperature; storage at  $-35\text{ }^\circ\text{C}$  gave a crystalline mass but it quickly melted at room temperature. The material so produced was used as is with no further purification; on the basis of  $^{31}\text{P}$  NMR it was > 95% pure.  $^1\text{H}$  NMR (400 MHz,  $\text{CDCl}_3$ )  $\delta$  3.29 (m,  $(\text{CH}_3)_2\text{CH}$ , 4H), 2.27 (d,  $^3J_{\text{PH}} = 8.8$  Hz,  $\text{CH}_3\text{C}(\text{O})$  3H), 1.23 (d,  $J = 6.8$  Hz, 12H), 1.18 (d,  $J = 6.4$  Hz, 12H);  $^{13}\text{C}$  NMR (100 MHz,  $\text{CDCl}_3$ )  $\delta$  227.9 (d,  $^1J_{\text{PC}} = 22.4$  Hz), 49.8 (br d,  $(\text{CH}_3)_2\text{CH}$ ,  $^2J_{\text{PC}} = 9.1$  Hz), 30.7 (d,  $\text{CH}_3\text{C}(\text{O})$ ,  $^2J_{\text{PC}} = 49.7$  Hz), 24.4 (d,  $J = 6.2$  Hz), 24.3 (d,  $J = 6.4$  Hz);  $^{31}\text{P}$  NMR (162 MHz,  $\text{CDCl}_3$ )  $\delta$  63.5; IR ( $\text{CDCl}_3$ ) 2969, 1654  $\text{cm}^{-1}$ . HRMS (ESI): Calcd for  $\text{C}_{14}\text{H}_{32}\text{N}_2\text{OP}$   $[\text{M}+\text{H}]^+$  275.2247, found 275.2247.

**(iPr<sub>2</sub>N)<sub>2</sub>PC(=CH<sub>2</sub>)OC(O)CH<sub>3</sub> (8)**. Reaction of **4** (0.876 g, 3.77 mmol),  $\text{CH}_3\text{C}(\text{O})\text{Cl}$  (0.319 g, 4.06 mmol, 1.08 equiv), and  $\text{Et}_3\text{N}$  (0.392 g, 3.87 mmol, 1.03 equiv) in 13 mL of  $\text{CH}_2\text{Cl}_2$  gave a mixture of 43% **8**, 32% **7**, and 25% unreacted **4**, on the basis of

integration of the  $^1\text{H}$  and  $^{31}\text{P}$  NMR spectra.  $^1\text{H}$  NMR (400 MHz,  $\text{CDCl}_3$ )  $\delta$  5.48 (t,  $J_{\text{HH}} = J_{\text{PH}} = 1.1$  Hz, 1H), 5.29 (dd,  $J_{\text{HH}} = 1.1$  Hz,  $J_{\text{PH}} = 7.3$  Hz, 1H), 2.09 (s, 3H);  $^{13}\text{C}$  NMR (100 MHz,  $\text{CDCl}_3$ )  $\delta$  168.8 (s), 161.5 (d,  $J_{\text{PC}} = 8.8$  Hz), 111.4 (d,  $J_{\text{PC}} = 16.8$  Hz), 48.0 (d,  $J_{\text{PC}} = 12.0$  Hz,  $\text{CH}(\text{CH}_3)_2$ );  $^{31}\text{P}$  NMR (162 MHz,  $\text{CDCl}_3$ )  $\delta$  49.7. The iPr peaks could not be identified except as noted, and it appeared that the presumed  $\text{OC}(\text{O})\text{CH}_3$  carbon also overlapped the iPr region on the basis of the DEPT NMR.

**(iPr<sub>2</sub>N)<sub>2</sub>PC(O)C<sub>6</sub>H<sub>5</sub> (9).** A sample of **4** (0.852 g, 3.67 mmol) prepared as described for the synthesis of **7** was suspended in 10 mL  $\text{CH}_2\text{Cl}_2$  and  $\text{Et}_3\text{N}$  (0.402 g, 3.97 mmol, 1.08 equiv). The flask was fitted with a dropping funnel containing a solution of 0.563 g of  $\text{C}_6\text{H}_5\text{C}(\text{O})\text{Cl}$  (4.01 mmol, 1.09 equiv) in 4 mL of  $\text{CH}_2\text{Cl}_2$ , which was then attached to a solenoid-controlled vacuum valve. The benzoyl chloride solution was added dropwise over ~1 min, while periodically opening the reaction to vacuum in order to keep the reaction under partial vacuum. Gentle bubbling of the solution occurred, presumably due to release of some HCl gas, giving an orange solution. Solvent removal gave an orange solid that was then extracted with 4  $\times$  5 mL of hexanes (the last extract was clear), filtering each extract through Celite. Final solvent removal gave 1.10 g (3.27 mmol, 89% yield) of **9** as a yellow-orange solid. The material so produced was used as is with no further purification; on the basis of  $^{31}\text{P}$  NMR it was > 99.6% pure.  $^1\text{H}$  NMR (400 MHz,  $\text{CDCl}_3$ )  $\delta$  8.00 (m,  $\text{H}_{\text{ortho}}$ , 2H), 7.46 (m,  $\text{H}_{\text{para}}$ , 1H), 7.38 (t,  $J = 7.8$  Hz,  $\text{H}_{\text{meta}}$ , 2H), 3.32 (m, 4H), 1.21 (d,  $J = 6.8$  Hz, 12H), 1.08 (d,  $J = 6.8$  Hz, 12H);  $^{13}\text{C}$  NMR (100 MHz,  $\text{CDCl}_3$ )  $\delta$  220.9 (d,  $^1J_{\text{PC}} = 23.7$  Hz), 140.8 (d,  $^2J_{\text{PC}} = 39.7$  Hz,  $\text{C}_{\text{ipso}}$ ), 132.3 (d,  $^5J_{\text{PC}} = 1.5$  Hz,  $\text{C}_{\text{para}}$ ), 128.2 ( $\text{C}_{\text{meta}}$ ), 127.9 (d,  $^3J_{\text{PC}} = 11.8$  Hz,  $\text{C}_{\text{ortho}}$ ), 49.5 (br d,  $^2J_{\text{PC}} = 8.1$  Hz), 24.3 (d,  $^3J_{\text{PC}} = 5.7$  Hz), 23.9 (d,  $^3J_{\text{PC}} = 6.1$  Hz);  $^{31}\text{P}$  NMR (162 MHz,  $\text{CDCl}_3$ )  $\delta$

59.3; IR (CDCl<sub>3</sub>) 2969, 1631 cm<sup>-1</sup>HRMS (ESI): Calcd for C<sub>19</sub>H<sub>34</sub>N<sub>2</sub>OP [M+H]<sup>+</sup> 337.2403, found 337.2402.

**3'-(5'-DMTr-OT)P(N(iPr)<sub>2</sub>)C(O)CH<sub>3</sub> (10).** Solid *N*-methylimidazolium triflate (NMI·Tf, 0.399 g, 1.72 mmol, 0.74 equiv) [6] was added to a suspension of **7** (0.639 g, 2.33 mmol, ) and 5'-*O*-(4,4'-dimethoxytrityl)thymidine (5'-DMTr-OT) [7] (1.20 g, 2.21 mmol, 0.95 equiv) in 10 mL acetonitrile. After stirring for 1.25 h, only a small amount of solid remained and the solution was filtered through Celite. Solvent removal using a vacuum pump gave a foamy yellow solid that was taken up in 10 mL benzene, 20 mL ether was added to precipitate salts, the mixture was filtered, and the solvent was again removed using a vacuum pump to give a yellow solid. This was stirred with 10 mL hexane to remove some of the starting acyl, giving 1.56 g of product as a yellow powder (99% crude yield) that was 12% starting acyl and 85% product by <sup>31</sup>P NMR but also contained impurities of DMTr-OT and iPr<sub>2</sub>NH<sub>2</sub><sup>+</sup> Tf<sup>-</sup>. Significant purification was achieved by taking up 1.32 g of this material in 8 mL benzene, filtering, and then precipitating out the product by addition of 24 mL of hexane. After cooling for 1 hr at -35 °C, the solvent was poured off and the residue pumped under vacuum to give a sticky orange solid; final solvent removal was achieved by addition of a small amount of ether and pulling a vacuum again to give a yellow foam (1.26 g, 95% recovery) that was 89% pure by <sup>31</sup>P NMR.

Chromatography of 0.65 g of this material on 40 mL of silica gel on a 60 mL fritted funnel, eluting with 9:1 CH<sub>2</sub>Cl<sub>2</sub>:THF, gave a yellow band collected in three fractions (60 mL 9:1 CH<sub>2</sub>Cl<sub>2</sub>:THF, 20 mL 1:1 CH<sub>2</sub>Cl<sub>2</sub>:THF and 40 mL THF); all three fractions exhibited a spot with R<sub>f</sub> = 0.5-0.55 on TLC (9:1 CH<sub>2</sub>Cl<sub>2</sub>:THF), with material at

the origin eluting at the end of the last fraction. Analysis by  $^{31}\text{P}$  NMR showed that the first two fractions (97.8 mg) were ~95% pure and ~86% the “fast” isomer at 117.6 ppm, while the third fraction (429 mg; 81% total recovery) was ~81% pure and ~33:67 “fast” : “slow” isomers at 117.6 and 116.8 ppm. The two samples were separately re-chromatographed.

The “fast” isomer was chromatographed on 10 mL of silica eluting only with 9:1  $\text{CH}_2\text{Cl}_2$ :THF, and gave in the first two UV-active fractions 57.1 mg of material that was ~95% pure as a 93:7 mixture of “fast” : “slow” isomers.  $^1\text{H}$  NMR (500 MHz,  $\text{CDCl}_3$ )  $\delta$  8.51 (br s, NH, 1H), 7.66 (~q,  $^4J \approx 1.2$  Hz,  $\text{H}_6$ , 1H), 7.40 (m, Ph, 2H), 7.31 – 7.22 (m, Ph and 4H of  $\text{MeOC}_6\text{H}_4$  AA'BB', 3H), 6.83 (m, 4H of  $\text{MeOC}_6\text{H}_4$  AA'BB'), 6.40 (dd,  $^3J = 7.7$ , 5.9 Hz,  $\text{H}_{1'}$ , 1H), 4.65 (ddd,  $^3J \approx 3.2$  Hz,  $\text{H}_{3'}$ , 1H), 4.32 (~ddd,  $^3J \approx 1.3$  Hz,  $\text{H}_{4'}$ , 1H), 3.79 (s,  $\text{MeOC}_6\text{H}_4$ , 6H), 3.52 (dd,  $^2J = 10.7$  Hz,  $^3J = 2.8$  Hz,  $\text{H}_{5'}$ , 1H), 3.37 (dd,  $^2J = 10.7$  Hz,  $^3J = 2.6$  Hz,  $\text{H}_{5'}$ , 1H), 3.28 (m,  $\text{CH}(\text{CH}_3)_2$ , 2H), 2.51 (m,  $\text{H}_{2'}$ , 1H), 2.33 (m,  $\text{H}_{2'}$ , 1H), 2.24 (d,  $^3J_{\text{PH}} = 5.4$  Hz,  $\text{CH}_3\text{C}(\text{O})\text{P}$ , 3H), 1.44 (d,  $^4J = 1.0$  Hz,  $\text{CH}_3\text{C}_1$ , 3H), 1.19 (br d,  $^3J = 7.8$  Hz,  $\text{CH}(\text{CH}_3)_2$ , 3H), 1.18 (br d,  $^3J = 7.3$  Hz,  $\text{CH}(\text{CH}_3)_2$ , 3H);  $^{13}\text{C}$  NMR (125.8 MHz,  $\text{CDCl}_3$ )  $\delta$  226.9 (d,  $^1J_{\text{PC}} = 25.3$  Hz), 163.8, 158.9, 150.3, 144.4, 135.7 ( $\text{CH}_1$ ), 135.5 ( $4^\circ$ ), 135.4 ( $4^\circ$ ), 130.27, 130.26 (Ar CH ~7.3;  $\text{MeOC}_6\text{H}_4$  CH ~6.8), 128.3 (Ph CH ~7.4), 128.1, (Ar CH, ~7.3), 127.3 (Ar CH, ~7.25), 113.40, 113.38 (Ar CH, ~7.3;  $\text{MeOC}_6\text{H}_4$  CH, ~6.8), 111.3 ( $4^\circ$ ), 87.1 ( $4^\circ$ ), 85.7 (d,  $^3J_{\text{PC}4'} = 5.4$  Hz,  $\text{C}_4'$ ), 84.9 ( $\text{CH}_{1'}$ , 6.40), 77.6 (d,  $^2J_{\text{PC}3'} = 19.9$  Hz,  $\text{CH}_3'$ ), 63.3 ( $\text{CH}_{5'}$ ), 55.4 (MeO, 3.79), 46 (iPr CH, from HSQC cross peak with  $^1\text{H}$  at  $\delta$  3.28), 40.5 (d,  $^3J_{\text{PC}2'} = 3.9$  Hz,  $\text{CH}_{2'}$ ), 30.8 (d,  $^2J_{\text{PC}} = 36.4$  Hz,  $\text{CH}_3\text{C}(\text{O})\text{P}$ ), ~25 (broad, iPr Me at 1.19 and 1.18), 15.4 (iPr Me at 1.19 and 1.18), 11.9 ( $\text{CH}_3\text{C}_1$ );  $^{31}\text{P}$  NMR (162

MHz, CDCl<sub>3</sub>) δ 117.6, 116.8 (93.2:6.8); IR (CDCl<sub>3</sub>) 3396, 2969, 1688 cm<sup>-1</sup>. HRMS (ESI): Calcd for C<sub>39</sub>H<sub>49</sub>N<sub>3</sub>O<sub>8</sub>P [M+H]<sup>+</sup> 718.3252, found 718.3252.

The 32:68 “fast”：“slow” mixture was chromatographed on 30 mL of silica eluting only with 9:1 CH<sub>2</sub>Cl<sub>2</sub>:THF, giving three fractions as white foams consisting of isomeric mixtures of the “fast”：“slow” isomers as follows: 46:54 (~96% pure, 81.5 mg), 25:75 (~91% pure, 40.0 mg), and 18:82 (~92% pure, 55.7 mg). Detailed spectra were obtained for the 46:54 mixture (only peaks for the “slow” isomer are given except as noted): <sup>1</sup>H NMR (500 MHz, CDCl<sub>3</sub>) δ 8.82, 8.77 (fast, slow, br s, NH), 7.60 (~q, <sup>4</sup>J ≈ 1.3 Hz, H<sub>1</sub>), 7.39 (m, 2H, Ph), 7.30 – 7.26 (m, 3H, Ph and 4H of MeOC<sub>6</sub>H<sub>4</sub> AA'BB'), 6.83 (m, 4H of MeOC<sub>6</sub>H<sub>4</sub> AA'BB'), 6.48 (dd, <sup>3</sup>J = 8.2, 5.7 Hz, H<sub>1</sub>'), 4.64 (m, H<sub>3</sub>'), 4.19 (~q, <sup>3</sup>J ≈ 2.6 Hz, H<sub>4</sub>'), 3.78 (s, 6H, MeOC<sub>6</sub>H<sub>4</sub>), 3.47 (dd, <sup>2</sup>J = 10.6 Hz, <sup>3</sup>J = 2.7 Hz, H<sub>5</sub>'), 3.32 (dd, <sup>2</sup>J = 10.6 Hz, <sup>3</sup>J = 2.7 Hz, H<sub>5</sub>'), 3.23 (m, CH(CH<sub>3</sub>)<sub>2</sub>, 2H), 2.65 (m, H<sub>2</sub>', 1H), 2.33 (m, H<sub>2</sub>', 1H), 2.34 (d, <sup>3</sup>J<sub>PH</sub> = 5.4 Hz, CH<sub>3</sub>C(O)P), 1.44 (br s (overlaps fast isomer), CH<sub>3</sub>C<sub>1</sub>), 1.40 (d, <sup>3</sup>J = 6.7 Hz, part of CH(CH<sub>3</sub>)<sub>2</sub>), 1.17 (br m, CH(CH<sub>3</sub>)<sub>2</sub>), 1.04 (br d, <sup>3</sup>J = 5.3 Hz, part of CH(CH<sub>3</sub>)<sub>2</sub>); <sup>13</sup>C NMR (125.8 MHz, CDCl<sub>3</sub>) δ 226.8 (d, <sup>1</sup>J<sub>PC</sub> = 25.3 Hz), 163.9, 158.9, 150.4, 144.3, 135.7 (CH<sub>1</sub>), 135.5 (4°), 135.4 (4°), 130.25, 130.21 (Ar CH ~7.3; MeOC<sub>6</sub>H<sub>4</sub> CH ~6.8), 128.3 (Ph CH ~7.4), 128.1, (Ar CH, ~7.3), 127.3 (Ar CH, ~7.25), 113.39, 113.37 (Ar CH, ~7.3; MeOC<sub>6</sub>H<sub>4</sub> CH, ~6.8), 111.4 (4°), 87.1 (4°), 85.8 (d, <sup>3</sup>J<sub>PC4'</sub> = 4.7 Hz), 84.9 (CH<sub>1</sub>', 6.48), 78.0 (d, <sup>2</sup>J<sub>PC3'</sub> = 19.0 Hz), 63.5 (C<sub>5</sub>'), 55.3 (MeO, 3.79), 46.7 (iPr CH, from HSQC cross peak with <sup>1</sup>H at δ 3.3), 40.1 (d, <sup>3</sup>J<sub>PC2'</sub> = 4.7 Hz), 30.83 (d, <sup>2</sup>J<sub>PC</sub> = 36.8 Hz, CH<sub>3</sub>C(O)P), ~25 (broad, iPr Me at 1.17, 1.04), 19.3 (iPr Me at 1.40), 11.9 (CH<sub>3</sub>C<sub>1</sub>); <sup>31</sup>P NMR (162 MHz, CDCl<sub>3</sub>) δ 117.6, 116.8 (46:54); IR (CDCl<sub>3</sub>) 3396,

2969, 1688  $\text{cm}^{-1}$ . HRMS (ESI): Calcd for  $\text{C}_{39}\text{H}_{49}\text{N}_3\text{O}_8\text{P}$   $[\text{M}+\text{H}]^+$  718.3252, found 718.3254.

**3'-(5'-DMTr-OT)P(N(iPr)<sub>2</sub>)C(O)C<sub>6</sub>H<sub>5</sub> (11).** An orange suspension of **9** (0.502 g, 1.49 mmol, 1.07 equiv), DMTr-OT (0.758 g, 1.39 mmol), and NMI·Tf (0.326 g, 1.40 mmol, 1.01 equiv) in 10 mL acetonitrile was stirred for 2 h to give a clear orange solution. Solvent removal using a vacuum pump gave an orange-yellow foam. Chromatography on 30 mL of silica gel on a 60 mL fritted funnel, eluting with 9:1  $\text{CH}_2\text{Cl}_2$ :THF gave a yellow band in 60 mL of solvent, discarding a pale yellow tail; solvent removal gave 0.757 g (70% crude yield) of yellow foam consisting of product and starting material. Final purification was achieved by taking up the material in 4 mL ether, and precipitating out product by addition of 10 mL of hexane with swirling, cooling briefly to  $-35\text{ }^\circ\text{C}$ , and filtration to give the product as a yellow solid. Addition of  $\text{CH}_2\text{Cl}_2$  followed by solvent removal was required to remove the hexane, giving 0.632 g of yellow foam (58% yield).  $^1\text{H}$  NMR (500 MHz,  $\text{CDCl}_3$ )  $\delta$  8.70, 8.62 (minor, major, br s, NH, 1H), 7.91 (m, 2H of Ph), 7.69, 7.62 (minor, major, ~q,  $^4J \approx 1.6, 1.3$  Hz,  $\text{H}_1$ , 1H), 7.62 – 7.2 (m, 8H of Ph and 4H of  $\text{MeOC}_6\text{H}_4$  AA'BB'), 6.80 (m, 4H of  $\text{MeOC}_6\text{H}_4$  AA'BB'), 6.51, 6.40 (major, minor, dd,  $^3J = 7.8, 6.2$ , and  $7.2, 6.2$  Hz,  $\text{H}'_1$ , 1H), 4.70 (m,  $\text{H}'_3$ , 1H), 4.43, 4.26 (minor, major, ~q,  $^3J \approx 3.0, 2.7$  Hz,  $\text{H}'_4$ , 1H), 3.781, 3.779 and 3.73, 3.71 (major, minor, each two diastereotopic s,  $\text{MeOC}_6\text{H}_4$ , 6H), 3.52, 3.43 (m,  $(\text{H}'_5)_2$ , 2H), 3.27 (m,  $\text{CH}(\text{CH}_3)_2$ , 2H), 2.73 (major, ddd,  $^2J = 13.8$  Hz,  $^3J = 6.1, 2.7$  Hz,  $\text{H}'_2$ , ~0.5 H), 2.58 (minor, ddd,  $^2J = 13.6$  Hz,  $^3J = 5.9, 3.2$  Hz,  $\text{H}'_2$ , ~0.5 H), 2.34 (m,  $\text{H}'_2$ , 1H), 1.45 (br s,  $\text{CH}_3\text{C}_1$ , 3H), 1.22, 1.09, 0.7 (br,  $\text{CH}(\text{CH}_3)_2$ , 6H);  $^{13}\text{C}$  NMR (125.8 MHz,  $\text{CDCl}_3$ )  $\delta$  217.2, 217.1 (major, minor, d,  $^1J_{\text{PC}} = 30.6, 29.9$  Hz), 163.94, 163.90, 163.86, 163.84, 163.82,



158.83, 158.81, 158.77, 158.73, 150.34, 150.30, 144.58, 144.46, 139.08, 139.02, 138.81, 138.75 (all 4°), 135.92 (CH<sub>1</sub> (major) 7.62), 135.82 (CH<sub>1</sub> (minor) 7.69), 135.55, 135.52, 135.51 (4°), 133.16, 133.08 (Ar CH ~7.5), 130.25, 130.22 (MeOC<sub>6</sub>H<sub>4</sub> CH ~7.3), 128.5, 128.4, 128.3, 128.09, 128.06, 127.89, 127.83, 127.24, 127.17 (Ar CH 7.9-7.2), 113.36, 113.34, 113.32 (MeOC<sub>6</sub>H<sub>4</sub> CH ~6.8), 111.22, 111.14 (4°), 86.99, 86.98 (4°), 85.8, 85.6 (d, <sup>3</sup>J<sub>PC4'</sub> = 5.5, 4.3 Hz), 85.0, 84.8 (CH<sub>1'</sub>, major, minor), 77.32, 77.16, 76.96 (visible in DEPT45, C<sub>3'</sub>H 4.70), 63.5, 63.1, 55.4, 55.30, 55.28 (MeO, 3.78-3.71), 46.6, 40.2, ~24.5 (broad, iPr Me), 11.9 (CH<sub>3</sub>C<sub>1</sub>); <sup>31</sup>P NMR (162 MHz, CDCl<sub>3</sub>) δ 119.8, 116.7 (42.5:57.5); IR (CDCl<sub>3</sub>) 3396, 2970, 1688 cm<sup>-1</sup>. HRMS (ESI): Calcd for C<sub>44</sub>H<sub>51</sub>N<sub>3</sub>O<sub>8</sub>P [M+H]<sup>+</sup> 780.34083, found 780.33935.

**3'-(5'-DMTr-OT)-5'-(3'-*t*-BuMe<sub>2</sub>Si-OT)PC(O)CH<sub>3</sub> (12).** To a stirred solution of 69.4 mg of **10** (0.097 mmol, 1.46 equiv) and 23.6 mg of 3'-*O*-(*tert*-butyldimethylsilyl)thymidine [8,9] (3'-TBS-OT, 0.066 mmol, 1 equiv) in 1 mL of acetonitrile was added 0.95 g (1.2 mL) of 0.20 M/0.10 M pyridinium trifluoroacetate/*N*-methylimidazole (PTFA/NMI) in acetonitrile (0.24/0.12 mmol, 2.5/1.2 equiv relative to **10**), in one portion. The clear solution was stirred for 25 min, the solution was concentrated to about half its volume using a vacuum pump, and the solution was applied to a column of 6 mL of silica gel packed in THF. A UV-active band was eluted in about 10 mL of THF, the solvent was removed using a vacuum pump, and triturated with ether to give 105.4 mg of pale yellow foam. <sup>31</sup>P NMR indicated complete reaction of **10** and the presence of ~12% of unidentified material in the dinucleoside acyl region, and <sup>1</sup>H NMR indicated ~14% of unreacted 3'-TBS-OT. The mixture was applied in 2 mL of CH<sub>2</sub>Cl<sub>2</sub> to a 15 mL column of silica packed in 5% THF in CH<sub>2</sub>Cl<sub>2</sub>. After elution with 20

mL of 5% THF in CH<sub>2</sub>Cl<sub>2</sub> followed by 10 mL of 10% THF in CH<sub>2</sub>Cl<sub>2</sub>, unidentified weakly UV-active material (6.6 mg total) eluted in 5 mL of 10% THF in CH<sub>2</sub>Cl<sub>2</sub> followed by 20 mL of 20% THF in CH<sub>2</sub>Cl<sub>2</sub>. The remaining UV-active material eluted in 30 mL of 20-30% THF in CH<sub>2</sub>Cl<sub>2</sub> followed by 20 mL of THF, giving 54.5 mg of **12** (~85% yield) that was ~84% pure by <sup>31</sup>P NMR and contained ~14 mol% unreacted 3'-TBS-OT.

Rechromatography of this material combined with similar fractions from prior syntheses (99 mg total) on a 15 mL column of silica packed in 10% THF in ethyl acetate gave after a 17 mL forerun an 8 mL UV-active fraction with virtually all the **12** recovered (55 mg), containing 6% of an unidentified impurity (<sup>31</sup>P NMR: 142.9 ppm) and ~36 mol% of 3'-TBS-OT. <sup>1</sup>H NMR (500 MHz, CDCl<sub>3</sub>) δ 9.57-9.35 (5 s, NH, 2H), 7.59, 7.55 (q, <sup>4</sup>J ≈ 1.2, 1.1 Hz, H<sub>6</sub>, 1H), 7.37 (m, 3H), 7.26 (m, 7H), 6.83 (d, J = 7.5 Hz, 4H of MeOC<sub>6</sub>H<sub>4</sub> AA'BB'), 6.42, 6.39 (dd, <sup>3</sup>J = 8.5, 6.0 Hz and 7.5, 6.0 Hz, <sup>T1</sup>H<sub>1</sub>', 1H), 6.29, 6.24 (t, <sup>3</sup>J = 6.5, 6.8 Hz, <sup>T2</sup>H<sub>1</sub>', 1H), 4.80 (~q, <sup>3</sup>J ≈ 6.8 Hz, <sup>T1</sup>H<sub>3</sub>', 0.5 H), 4.38, 4.21, 4.06 (m, ~2H), 3.93, 3.89 (m, 2H, overlapping with 3'-TBS-OT), 3.781, 3.778 (s, MeO, 6H), 3.52, 3.36 (m, <sup>T1</sup>H<sub>5</sub>', 1.5H), 2.91 (m, <sup>T1</sup>H<sub>5</sub>', 0.5 H), 2.6-2.2 (m, H<sub>2</sub>', 4H), 2.36, 2.28 (d, J = 4.0 and 4.0 Hz, CH<sub>3</sub>C(O), 3H, with overlapping 3'-TBS-OT), 1.87, 1.83 (s, <sup>T2</sup>CH<sub>3</sub>C-5, 3H), 1.46, 1.45 (d, <sup>4</sup>J ≈ 0.5 Hz, <sup>T1</sup>CH<sub>3</sub>C-5, 3H), 0.88 (s, *t*-Bu, 9H), 0.078, 0.054, 0.040 (s, Me<sub>2</sub>Si, 6H); <sup>13</sup>C NMR (125.8 MHz, CDCl<sub>3</sub>) δ 223.28, 223.25 (d, <sup>1</sup>J<sub>PC</sub> = 38.6, 41.4 Hz), 164.11, 164.04, 158.9, 150.68, 150.63, 150.51, 144.20, 144.16 (all 4°), 137.15, 136.0, 135.24 (CH<sub>6</sub> 7.59, 7.55), 135.17 (CH<sub>6</sub> 7.59, 7.55), 130.2, 128.2, 127.4, 113.4, (MeOC<sub>6</sub>H<sub>4</sub> 6.83), 111.7 (4°), 111.27 (4°), 111.20 (4°), 111.11 (4°), 87.7 (3'-TBS-OT, CH<sub>1</sub>'), 87.33, 87.28, 87.0, 86.0, 85.7, 85.4, 85.1, 84.75, 84.69, 71.7, 71.36, 71.32, 68.4, 66.7, 63.2, 63.1, 62.1, 55.4 (MeO), 40.75, 40.59, 39.9, 30.2 (CH<sub>3</sub>C(O)), 29.9 (CH<sub>3</sub>C(O)), 25.83 (*t*-Bu),

25.79 (*t*-Bu), 18.06, 18.04, 18.00 (*t*-Bu 4° C), 12.63, 12.54 (<sup>T2</sup>CH<sub>3</sub>C-5), 11.99, 11.92 (<sup>T1</sup>CH<sub>3</sub>C-5), -4.52, -4.58, -4.72, -4.74 (CH<sub>3</sub>Si); <sup>31</sup>P NMR (202 MHz, CDCl<sub>3</sub>) δ 148.2, 145.2 (49:51); IR (CDCl<sub>3</sub>) 3395, 2957, 2932, 1690 cm<sup>-1</sup>. HRMS (ESI): Calcd for C<sub>49</sub>H<sub>62</sub>N<sub>4</sub>O<sub>13</sub>PSi<sup>+</sup> [M+H]<sup>+</sup> 973.38148, found 973.38100.

**3'-(5'-DMTr-OT)-5'-(3'-*t*-BuMe<sub>2</sub>Si-OT)PC(O)C<sub>6</sub>H<sub>5</sub> (13).** To a stirred solution of 118.0 mg of **11** (0.151 mmol, 1.34 equiv) and 40.0 mg of 3'-TBS-OT (0.112 mmol, 1 equiv) in 2 mL of acetonitrile was added 1.51 g (1.93 mL) of 0.20 M/0.10 M PTFA/NMI in acetonitrile (0.385/0.193 mmol, 2.6/1.3 equiv relative to **11**), in one portion. The yellow solution was stirred for 30 min, the solution was concentrated to about half its volume using a vacuum pump, and the solution was applied to a column of 7 mL of silica gel packed in THF. The yellow band was eluted in about 10 mL of THF, the solvent was removed using a vacuum pump, and triturated with ether to give 156.8 mg of yellow foam. <sup>31</sup>P NMR indicated the mixture contained 34 mol% of **11**. The mixture was applied in 3 mL of CH<sub>2</sub>Cl<sub>2</sub> to a 15 mL column of silica packed in 5% THF in CH<sub>2</sub>Cl<sub>2</sub>. After elution with 32 mL of 5% THF in CH<sub>2</sub>Cl<sub>2</sub> followed by 10 mL of 10% THF in CH<sub>2</sub>Cl<sub>2</sub>, unreacted **11** eluted in 45 mL of 10% THF in CH<sub>2</sub>Cl<sub>2</sub>, towards the end of which ~6 mg of **13** was eluted. The main yellow band eluted in 30 mL of 1:1 THF:CH<sub>2</sub>Cl<sub>2</sub>, giving 88 mg of **13** as a yellow solid, containing 7.5% of unidentified impurities (<sup>31</sup>P NMR: 150.1, 148.0 ppm, 5.5% and 2% respectively), a trace of **11**, and ~12% of 3'-TBS-OT. <sup>1</sup>H NMR (500 MHz, CDCl<sub>3</sub>) δ 9.19-9.05 (4 s, NH, 2H), 7.96-7.93 (m, Ar, 2H), 7.60-7.19 (m, Ar, <sup>T1</sup>H<sub>6</sub>, <sup>T2</sup>H<sub>6</sub>, 14H), 6.84-6.81 (m, 4H of MeOC<sub>6</sub>H<sub>4</sub> AA'BB'), 6.44, 6.40 (dd, <sup>3</sup>J = 7.8, 6.3 Hz and 8.5, 5.5 Hz, <sup>T1</sup>H<sub>1</sub>', 1H), 6.30 (m, <sup>T2</sup>H<sub>1</sub>', 1H), 4.86, 4.79 (~br dd, <sup>3</sup>J ≈ 6.9, 6.9 Hz, <sup>T1</sup>H<sub>3</sub>', 1 H), 4.43, 4.34 (~dd and m, <sup>3</sup>J ≈ 9.0, 5.0 Hz, <sup>T2</sup>H<sub>3</sub>', 1 H), 4.2-4.00 (m, 1H, <sup>T1</sup>H<sub>4</sub>', 2H,

$^2\text{H}_5'$ ), 3.93 (m, 1H overlapping with 3'-TBS-OT,  $^2\text{H}_4'$ ), 3.786, 3.785, 3.77 (s, MeO, 6H), 3.44-3.34 (m,  $^1\text{H}_5'$ , 1.5 H), 3.11 (dd,  $^3J = 2.3$  Hz,  $^2J = 10.8$  Hz,  $^1\text{H}_5'$ , 0.5 H), 2.50, 2.42 (br dd,  $^3J = 12.3, 5.3$  Hz and  $13.1, 5.8$  Hz,  $^1\text{H}_2'$ , 1H), 2.38-2.23 (m,  $^1\text{H}_2'$ , 1H), 2.22-2.11 (m,  $^2\text{H}_2'$ , 2H), 1.85, 1.79 (d,  $^4J \approx 0.7$  Hz,  $^2\text{CH}_3\text{C-5}$ , 3H), 1.45, 1.38 (d,  $^4J \approx 0.7$  Hz,  $^1\text{CH}_3\text{C-5}$ , 3H), 0.86 (s, *t*-Bu, 9H), 0.032, 0.028, 0.014, 0.003 (s,  $\text{Me}_2\text{Si}$ , 6H);  $^{13}\text{C}$  NMR (125.8 MHz,  $\text{CDCl}_3$ )  $\delta$  211.6, 211.1 (minor, major, d,  $^1J_{\text{PC}} = 44.3, 42.4$  Hz), 163.9, 158.9, 150.6, 150.4, 144.28, 144.22, 137.4 (all  $4^\circ$ ), 137.17, 136.9 ( $4^\circ$ ), 136.3, 135.9, 135.4, 135.3, 135.22 ( $4^\circ$ ), 135.19 ( $4^\circ$ ), 135.18 ( $4^\circ$ ), 134.49, 134.41, 130.20, 130.13, 129.19, 129.16, 128.44, 128.37, 128.31, 128.19, 128.13, 127.38, 113.47 ( $\text{MeOC}_6\text{H}_4$  6.84-6.81), 113.42 ( $\text{MeOC}_6\text{H}_4$  6.84-6.81), 113.41 ( $\text{MeOC}_6\text{H}_4$  6.84-6.81), 111.67 ( $4^\circ$ ), 111.62 ( $4^\circ$ ), 111.4 ( $4^\circ$ ), 111.20 ( $4^\circ$ ), 111.16 ( $4^\circ$ ), 87.7, 87.3, 86.1, 85.8, 85.5, 85.4, 84.9 ( $\text{C}_{\text{H}1'}$ ), 84.7 ( $\text{C}_{\text{H}1'}$ ), 84.6 ( $\text{C}_{\text{H}1'}$ ), 71.8, 71.6, 68.6, 68.5, 66.95, 66.91, 63.29 ( $^1\text{CH}_5'$ ), 63.17 ( $^1\text{CH}_5'$ ), 62.2 ( $\text{CH}_5'$  of 3'-TBS-OT), 55.39 (MeO), 55.37 (MeO), 40.67 ( $\text{CH}_2'$ ), 40.58 ( $\text{CH}_2'$ ), 39.94, 25.8 (*t*-Bu), 18.0 (*t*-Bu  $4^\circ$  C), 12.59, 12.56 ( $^2\text{CH}_3\text{C-5}$ ), 11.9, 11.8 ( $^1\text{CH}_3\text{C-5}$ ), -4.52, -4.59, -4.71, -4.76 ( $\text{CH}_3\text{Si}$ );  $^{31}\text{P}$  NMR (202 MHz,  $\text{CDCl}_3$ )  $\delta$  151.5, 150.2 (46:54); IR ( $\text{CDCl}_3$ ) 3395, 2955, 2932, 1690  $\text{cm}^{-1}$ . HRMS (ESI): Calcd for  $\text{C}_{54}\text{H}_{63}\text{N}_4\text{NaO}_{13}\text{PSi}^+$   $[\text{M}+\text{Na}]^+$  1057.37907, found 1057.37949.

**Conversion of 12 and 13 to 17.** Sulfurization of **13** occurred by reaction in  $\text{CD}_3\text{CN}$  with excess phenylacetyl disulfide (PADS) [10] or DDTT [11] and gave new peaks at 66.4 and 66.0 ppm in the  $^{31}\text{P}$  NMR spectrum consistent with formation of the tetravalent sulfides. Reaction with 2 M triethylammonium bicarbonate (TEAB) or with bis(trimethylsilyl)acetamide (BSA) [12] followed by TEAB gave material with only one major peak in the  $^{31}\text{P}$  NMR spectrum at 113.3 ppm, and it could not be identified.

Oxidation of **13** in acetonitrile with anhydrous 3.3 M *tert*-butyl hydroperoxide [13] gave two peaks in the  $^{31}\text{P}$  NMR spectrum for the diastereomeric oxides at -0.9 and -1.1 ppm. Treatment with TEAB gave the *H*-phosphonate ( $^{31}\text{P}$  NMR ( $\text{CDCl}_3$ ): 8.8, 7.5 ppm [12]), and treatment with PADS gave the diastereomeric phosphorothioates ( $^{31}\text{P}$  NMR ( $\text{CDCl}_3$ ): 58.0, 57.9 ppm [12]).

Oxidation of **12** in the same manner gave the diastereomeric oxides ( $^{31}\text{P}$  NMR ( $\text{CDCl}_3$ ): -2.5, -2.7 ppm), and TEAB and PADS gave the same *H*-phosphonate and phosphorothioate spectra as for **13**.

**Thermal decomposition of 12 and 13.** Samples of **12** or **13** were dissolved in acetonitrile and added to a one-piece teflon vacuum stopcock-sealed heavy-walled glass vessel. The vessel was evacuated using a vacuum pump and then heated in a thermostatted oil bath. Periodically the solvent was removed under vacuum and the contents analyzed by NMR after extraction into  $\text{CDCl}_3$  solution; after adding the NMR sample back to the vessel, the solvent was once again removed under vacuum and replaced with acetonitrile. Two samples of **12** were examined. A 1:1 mixture of diastereomers was heated for 12 h at 50 °C followed by 4 h at 75 °C, with no change in diastereomer ratio but extensive decomposition to unidentified materials that exhibited very broad bands in the  $^1\text{H}$  and particularly the  $^{31}\text{P}$  NMR spectra. A 42:58 sample of diastereomers was heated sequentially for 1.5 h at 100 °C, 1.5 h at 130°C, and 1.5 h at 150 °C. No change in diastereomer ratio occurred, but decomposition was nearly complete at the end. One sample of **13** was heated, for 2.5 h at 75 °C and 6 h at 100 °C, with no change in the 1:1 diastereomer ratio, and again with nearly complete decomposition.

**X-ray structure of 9.** A yellow fragment of **9** with approximate dimensions 0.31 mm x 0.37 mm x 0.41 mm, cleaved from a large crystal obtained by slow cooling of a saturated hexanes solution at  $-35\text{ }^{\circ}\text{C}$ , was used for the X-ray crystallographic analysis. The X-ray intensity data were measured on a Bruker Smart Breeze CCD system equipped with a graphite monochromator at 100(2) K, cooled by an Oxford Cryosystems 700 Series Cryostream. A total of 1464 frames were collected. The total exposure time was 12.20 hours. The frames were integrated with the Bruker SAINT software package using a narrow-frame algorithm. The integration of the data using a monoclinic unit cell yielded a total of 21786 reflections to a maximum  $\theta$  angle of  $27.10^{\circ}$  (0.78 Å resolution), of which 4311 were independent (average redundancy 5.054, completeness = 100.0%,  $R_{\text{int}} = 2.00\%$ ,  $R_{\text{sig}} = 1.47\%$ ) and 3921 (90.95%) were greater than  $2\sigma(F^2)$ . The final cell constants of  $a = 15.8768(8)\text{ \AA}$ ,  $b = 9.2589(5)\text{ \AA}$ ,  $c = 14.0614(7)\text{ \AA}$ ,  $\beta = 108.8770(10)^{\circ}$ , volume =  $1955.87(17)\text{ \AA}^3$ , were based upon the refinement of the XYZ-centroids of 9998 reflections above  $20\sigma(I)$  with  $5.168^{\circ} < 2\theta < 54.18^{\circ}$ . Data were corrected for absorption effects using the numerical method (SADABS). The ratio of minimum to maximum apparent transmission was 0.927. The calculated minimum and maximum transmission coefficients (based on crystal size) were 0.9430 and 0.9550.

The structure was solved and refined using the Bruker SHELXTL Software Package, using the space group  $P2_1/c$ , with  $Z = 4$  for the formula unit,  $\text{C}_{19}\text{H}_{33}\text{N}_2\text{OP}$ . The final anisotropic full-matrix least-squares refinement on  $F^2$  with 249 variables converged at  $R_1 = 3.11\%$ , for the observed data and  $wR_2 = 8.21\%$  for all data. The goodness-of-fit was 1.048. The largest peak in the final difference electron density synthesis was 0.412

$e^-/\text{\AA}^3$  and the largest hole was  $-0.202 e^-/\text{\AA}^3$  with an RMS deviation of  $0.041 e^-/\text{\AA}^3$ . On the basis of the final model, the calculated density was  $1.143 \text{ g/cm}^3$  and  $F(000)$ ,  $736 e^-$ .

Cambridge Crystallographic Data Centre deposition number for **9**: CCDC 1030743. The data can be obtained free from Cambridge Crystallographic Data Centre via [http://www.ccdc.cam.ac.uk/data\\_request/cif](http://www.ccdc.cam.ac.uk/data_request/cif).

**Calculations.** All geometry and NMR calculations were carried out using *Gaussian 09 Revision A.02 and D.01* [14] by first carrying out a geometry optimization (DFT, 6-31G(d), B3LYP) with modeling of solvation in chloroform using the polarization continuum model (IEFPCM), with calculation of vibrational frequencies to insure the finding of an energy minimum; NMR calculations (GIAO) were then carried out on the optimized structures using the 6-311+G(2d,p) basis set and the same IEFPCM solvation method.

Each of the inversion barrier calculations was carried out by optimizing using the 6-31+G(d) basis set, but without solvation modeling, with the exception of the phosphite triester where acetonitrile modeling was used. Following optimization, one of the groups was rotated to give the inverted structure, which was then reoptimized; **18** and **19** gave back the same structures but in the opposite configuration at phosphorus. For the transition state calculations, one enantiomer of each optimized structure was converted to a trigonal planar structure, and then used as the starting point for the transition state search. Both the QST3 option in *Gaussian* as well as the simpler Berny TS option  $ts=(opt,estmfc, noeigentest)$  described by the Collum group [15] were successfully used. The reported barriers are the smaller barrier from each ground state, as the sum of the electronic and thermal free energies at 298.15 K.

## References

1. Gottlieb, H. E.; Kotlyar, V.; Nudelman, A., *J. Org. Chem.* **1997**, *62*, 7512-7515.
2. Fulmer, G. R.; Miller, A. J. M.; Sherden, N. H.; Gottlieb, H. E.; Nudelman, A.; Stoltz, B. M.; Bercaw, J. E.; Goldberg, K. I., *Organometallics* **2010**, *29*, 2176-2179.
3. Williams, D. B. G.; Lawton, M., *J. Org. Chem.* **2010**, *75*, 8351-8354.
4. King, R. B.; Sundaram, P. M., *J. Org. Chem.* **1984**, *49*, 1784-1789.
5. Dellinger, D. J.; Sheehan, D. M.; Christensen, N. K.; Lindberg, J. G.; Caruthers, M. H., *J. Am. Chem. Soc.* **2003**, *125*, 940-950.
6. Xie, C.; Staszak, M. A.; Quatroche, J. T.; Sturgill, C. D.; Khau, V. V.; Martinelli, M. J., *Org. Process Res. Dev.* **2005**, *9*, 730-737.
7. Schaller, H.; Weimann, G.; Lerch, B.; Khorana, H. G., *J. Am. Chem. Soc.* **1963**, *85*, 3821-3827.
8. Ogilvie, K. K.; Thompson, E. A.; Quilliam, M. A.; Westmore, J. B., *Tetrahedron Lett.* **1974**, 2865-2868.
9. Ogilvie, K. K., *Can. J. Chem.* **1973**, *51*, 3799-3807.
10. Cheruvallath, Z. S.; Carty, R. L.; Moore, M. N.; Capaldi, D. C.; Krotz, A. H.; Wheeler, P. D.; Turney, B. J.; Craig, S. R.; Gaus, H. J.; Scozzari, A. N.; Cole, D. L.; Ravikumar, V. T., *Org. Process Res. Dev.* **2000**, *4*, 199-204.
11. Guzaev, A. P., *Tetrahedron Lett.* **2011**, *52*, 434-437.
12. Mukhlall, J. A.; Hersh, W. H., *Nucleosides, Nucleotides Nucleic Acids* **2011**, *30*, 706-725.
13. Hill, J. G.; Rossiter, B. E.; Sharpless, K. B., *J. Org. Chem.* **1983**, *48*, 3607-3608.
14. Frisch, M. J.; Trucks, G. W.; Schlegel, H. B.; Scuseria, G. E.; Robb, M. A.; Cheeseman, J. R.; Scalmani, G.; Barone, V.; Mennucci, B.; Petersson, G. A.; Nakatsuji, H.; Caricato, M.; Li, X.; Hratchian, H. P.; Izmaylov, A. F.; Bloino, J.; Zheng, G.; Sonnenberg, J. L.; Hada, M.; Ehara, M.; Toyota, K.; Fukuda, R.; Hasegawa, J.; Ishida, M.; Nakajima, T.; Honda, Y.; Kitao, O.; Nakai, H.; Vreven, T.; Montgomery Jr., J. A.; Peralta, J. E.; Ogliaro, F.; Bearpark, M.; Heyd, J. J.; Brothers, E.; Kudin, K. N.; Staroverov, V. N.; Keith, T.; Kobayashi, R.; Normand, J.; Raghavachari, K.; Rendell, A.; Burant, J. C.; Iyengar, S. S.; Tomasi, J.; Cossi, M.; Rega, N.; Millam, J. M.; Klene, M.; Knox, J. E.; Cross, J. B.; Bakken, V.; Adamo, C.; Jaramillo, J.; Gomperts, R.; Stratmann, R. E.; Yazyev, O.; Austin, A. J.; Cammi, R.; Pomelli, C.; Ochterski, J. W.; Martin, R. L.; Morokuma, K.; Zakrzewski, V. G.; Voth, G. A.; Salvador, P.; Dannenberg, J. J.; Dapprich, S.; Daniels, A. D.; Farkas, O.; Foresman, J. B.; Ortiz, J. V.; Cioslowski, J.; Fox, D. J. *Gaussian 09, Revision D.01*, Gaussian, Inc.: Wallingford, CT, 2009.
15. Collum, D. B. Electronic Structure calculations in *Gaussian*. [http://collum.chem.cornell.edu/documents/Gaussian\\_optimization.pdf](http://collum.chem.cornell.edu/documents/Gaussian_optimization.pdf) (accessed October 29, 2014).



<sup>1</sup>H NMR

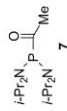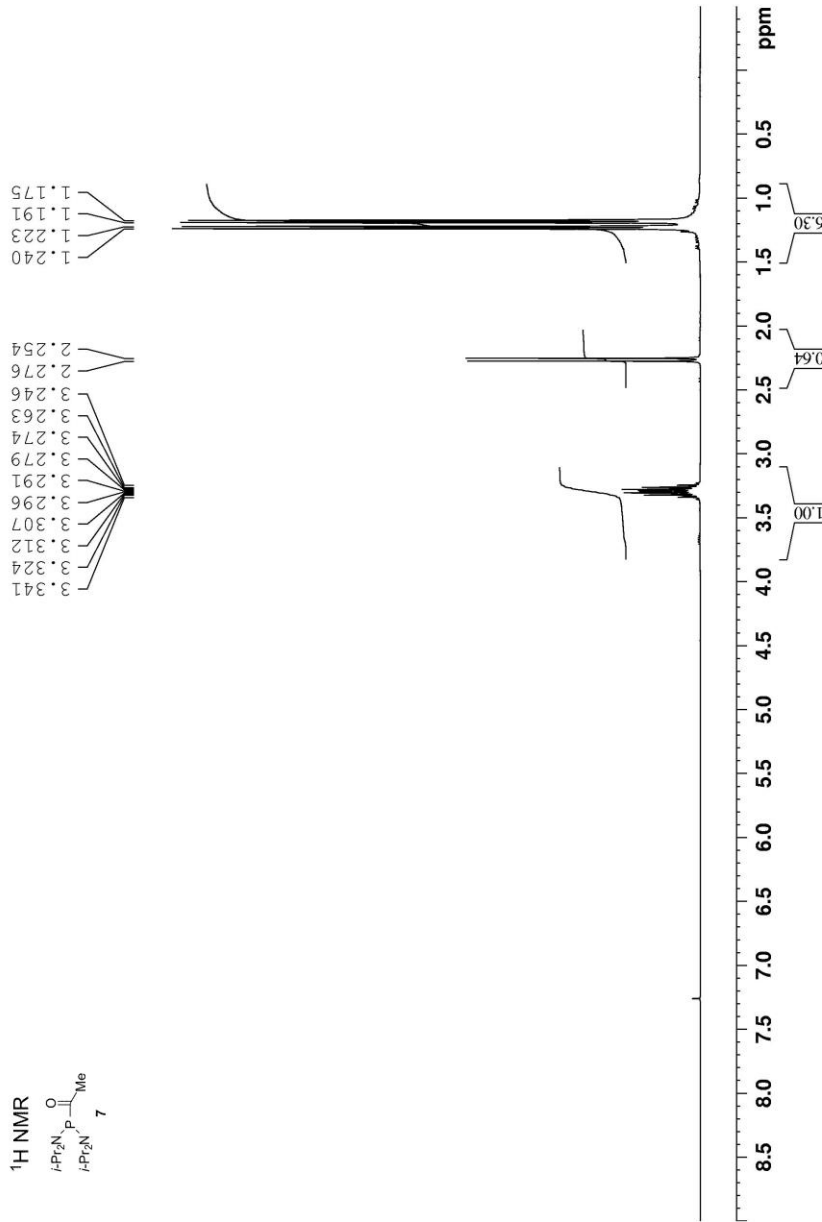

Current Data Parameters  
NAME whh041714  
EXPNO 30  
PROCNO 1

F2 - Acquisition Parameters

Date\_ 20140417  
Time 16.52  
INSTRUM spect  
PROBHD 5 mm QNP 1H/1  
PULPROG zg30  
TD 65536  
SOLVENT CDCl3  
NS 16  
DS 2  
SWH 8278.146 Hz  
FIDRES 0.126314 Hz  
AQ 3.9584243 sec  
RG 80.6  
DW 60.400 usec  
DE 6.00 usec  
TE 295.2 K  
D1 1.00000000 sec  
TD0 1

==== CHANNEL f1 =====  
NUC1 1H  
P1 10.10 usec  
PL1 -6.00 dB  
SFO1 400.1324710 MHz

F2 - Processing parameters  
SI 32768  
SF 400.1300094 MHz  
WDW EM  
SSB 0  
LB 0.30 Hz  
GB 0  
PC 1.00  
SR 9.39 Hz

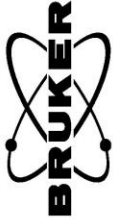

Current Data Parameters  
 NAME WHh041714  
 EXPNO 32  
 PROCNO 1

F2 - Acquisition Parameters  
 Date\_ 20140417  
 Time 17.32  
 INSTRUM spect  
 PROBHD 5 mm QNP 1H/1  
 PULPROG zgpg30  
 TD 65536  
 SOLVENT CDCl3  
 NS 512  
 DS 28248.56 Hz  
 SWH 631039 Hz  
 FIDRES 1.1600372 sec  
 AQ 143.7  
 RG 17.700 usec  
 DE 6.00 usec  
 TE 295.2 K  
 D1 2.0000000 sec  
 d11 0.0300000 sec  
 DELTA 1.8999999 sec  
 TD0 1

CHANNEL f1 13C  
 P1 7.10 usec  
 PL1 -6.00 dB  
 SFO1 100.6238364 MHz

CHANNEL f2 1H  
 CPDPRG2 waltz16  
 NUC2 1H  
 PCPD2 100.00 usec  
 PL2 -6.00 dB  
 PL12 13.91 dB  
 PL13 120.00 dB  
 SFO2 400.1316005 MHz

F2 - Processing parameters  
 SI 32768  
 SF 100.6127546 MHz  
 WDW EM  
 SSB 0  
 LB 1.00 Hz  
 GB 0  
 PC 1.40  
 SR -14.44 Hz

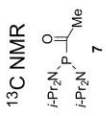

228.02  
227.79

77.48  
77.16  
76.84

49.80  
49.71

30.94  
30.44  
24.41  
24.32  
24.26

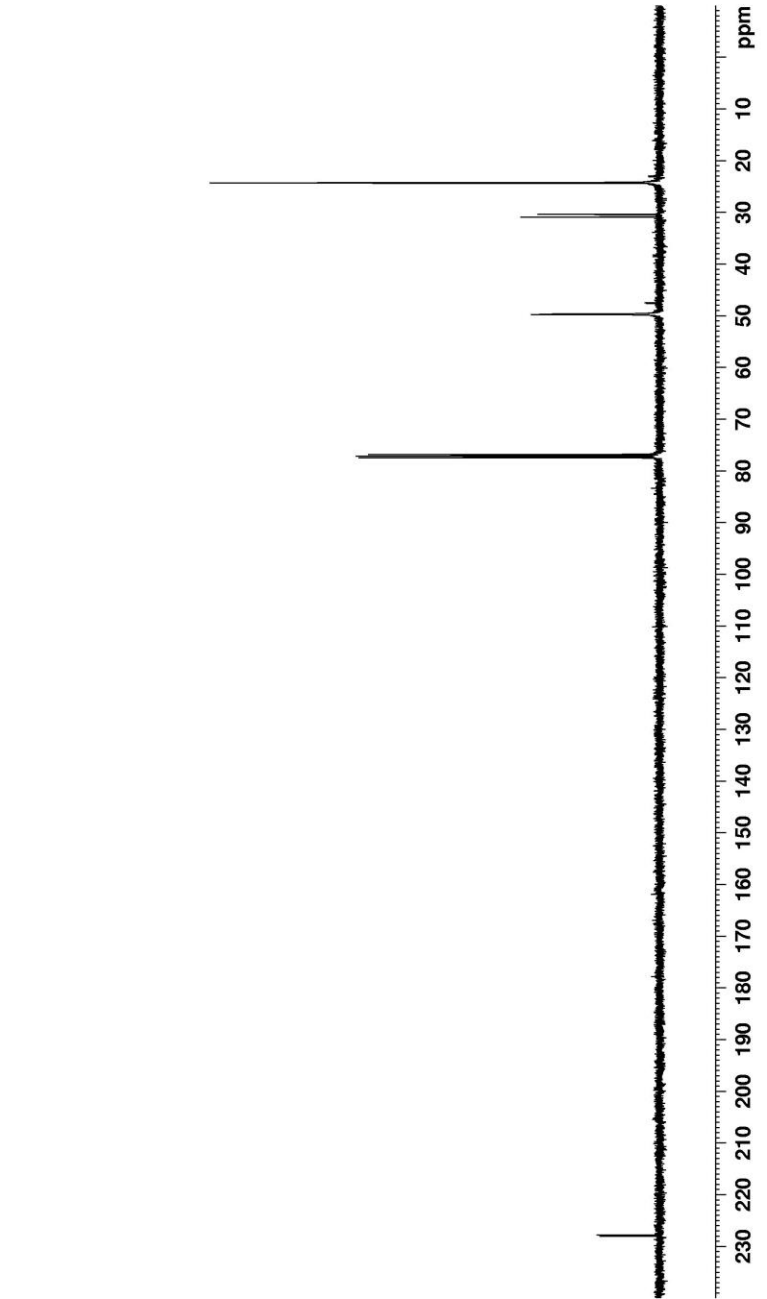

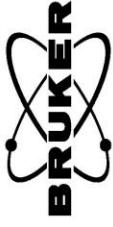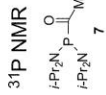

63.49

Current Data Parameters  
NAME whh041714  
EXPNO 31  
PROCNO 1

F2 - Acquisition Parameters  
Date\_ 20140417  
Time 17.04  
INSTRUM spect  
PROBHD 5 mm QNP 1H/1  
PULPROG zgpg30  
TD 65536  
SOLVENT CDCl3  
NS 256  
DS 4  
SWH 64935.066 Hz  
FIDRES 0.390856 Hz  
AQ 0.5046772 sec  
RG 3251  
DW 7.700 usec  
DE 6.00 usec  
TE 295.2 K  
D1 2.0000000 sec  
d11 0.0300000 sec  
DELTA 1.8999999 sec  
TD0 1

===== CHANNEL f1 =====  
NUC1 31p  
P1 4.65 usec  
PL1 -6.00 dB  
SFO1 161.9917906 MHz

===== CHANNEL f2 =====  
CPDPRG2 waltz16  
NUC2 1H  
PCPD2 100.00 usec  
PL2 -6.00 dB  
PL12 13.91 dB  
PL13 120.00 dB  
SFO2 400.1316005 MHz

F2 - Processing parameters  
SI 32768  
SF 161.9755358 MHz  
WDW EM  
SBB 0  
LB 1.00 Hz  
GB 0  
PC 1.40  
SR -57.24 Hz

250 200 150 100 50 0 -50 -100 ppm

2D-HETCOR

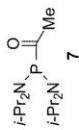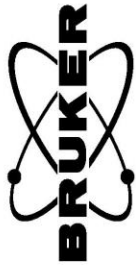

Current Data Parameters  
 NAME: whh04174  
 EXPNO: 35  
 PROCNO: 1

F2 - Acquisition Parameters  
 Date\_ 20140417  
 Time 12:05:13  
 INSTRUM spect  
 PROBHD 5 mm QNP 1H/1  
 PULPROG hzgpcfg  
 SOLVENT CDCl3  
 NS 8  
 DS 4  
 SWH 938.76 Hz  
 FWHZ 671.136 Hz  
 FIDRES 0.7023236 sec  
 RG 11585.2  
 DW 171.600 usec  
 DE 1.000 usec  
 TE 295.2 K  
 CNST2 145.0000000  
 CNST11 3.0000000  
 D1 0.0000000 sec  
 D2 1.42491806 sec  
 d2 0.00344828 sec  
 g3 0.00229885 sec  
 g4 0.00000000 sec  
 g5 0.00000000 sec  
 INO 0.00046800 sec

===== CHANNEL f1 =====  
 NUC1 13C  
 P1 7.10 usec  
 P2 14.20 usec  
 PL1 -6.00 dB  
 SFO1 100.6164840 MHz

===== CHANNEL f2 =====  
 CPDPRG2 waltz16  
 NU2 1H  
 P1 10.10 usec  
 PCPD2 100.00 usec  
 PL2 -6.00 dB  
 PL12 13.91 dB  
 SFO2 400.1398309 MHz

F1 - Acquisition parameters  
 ND0 1.2  
 SFO1 400.1368 MHz  
 FIDRES 9.574142 Hz  
 SW 3.063 Ppm  
 FMODE QF

F2 - Processing parameters  
 SI 2048  
 SF 100.6127690 MHz  
 W 65536  
 SSB 2  
 LB 0.00 Hz  
 GB 1.0  
 SC 0  
 SR 0.00 Hz

F1 - Processing parameters  
 SI 1024  
 SF 400.1300321 MHz  
 W 65536  
 SSB 2  
 LB 0.00 Hz  
 GB 0.00 Hz

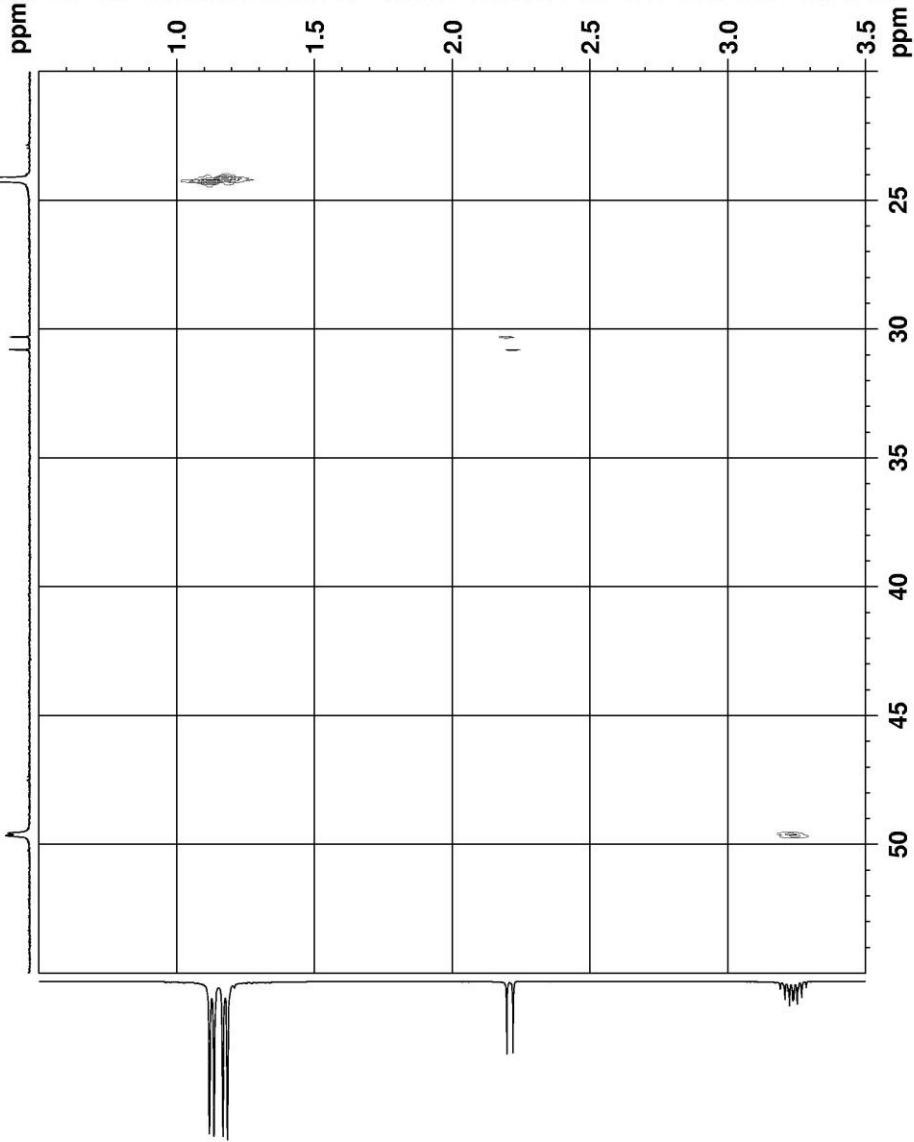

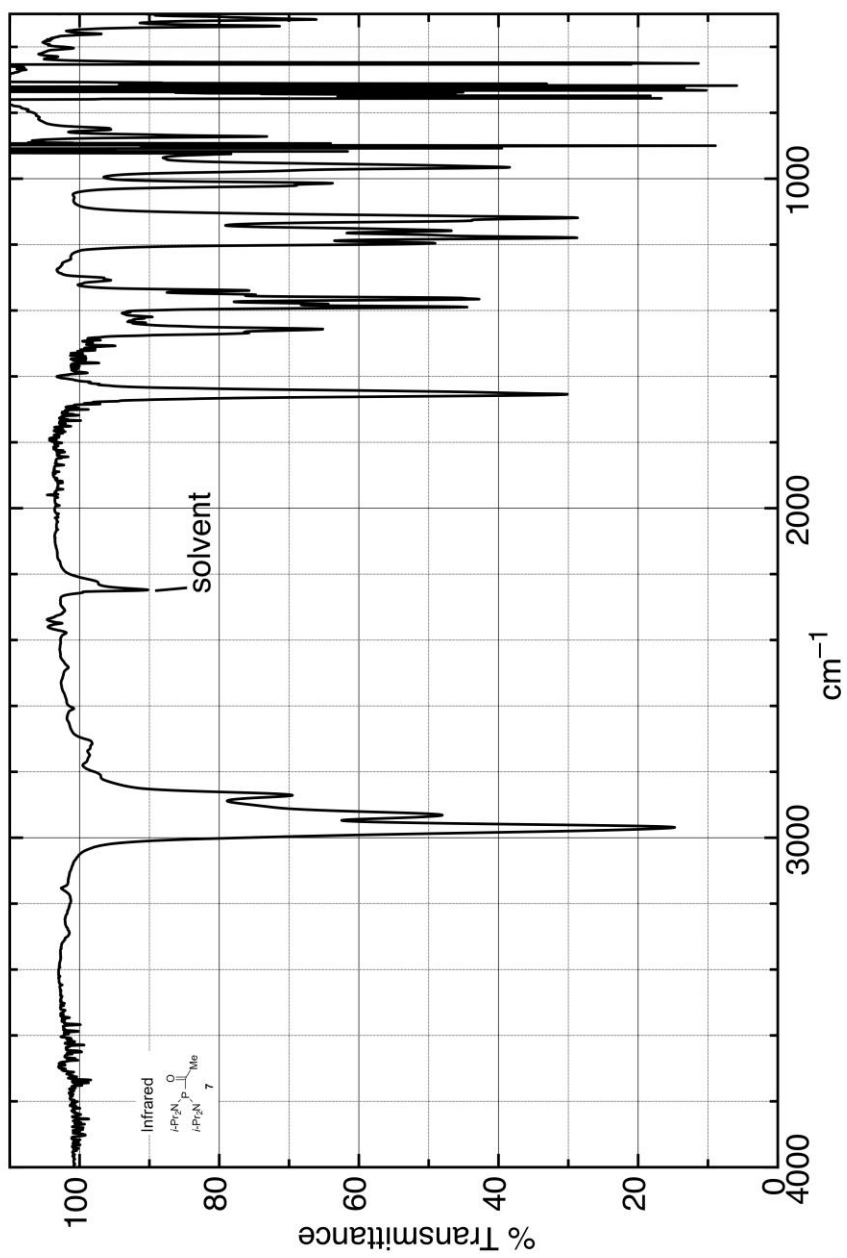

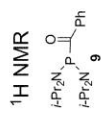

8.008  
8.006  
8.006  
7.999  
7.994  
7.989  
7.985  
7.487  
7.469  
7.464  
7.454  
7.451  
7.448  
7.399  
7.379  
7.360  
7.260

3.371  
3.354  
3.338  
3.326  
3.321  
3.309  
3.293  
3.276

1.219  
1.202  
1.084  
1.067

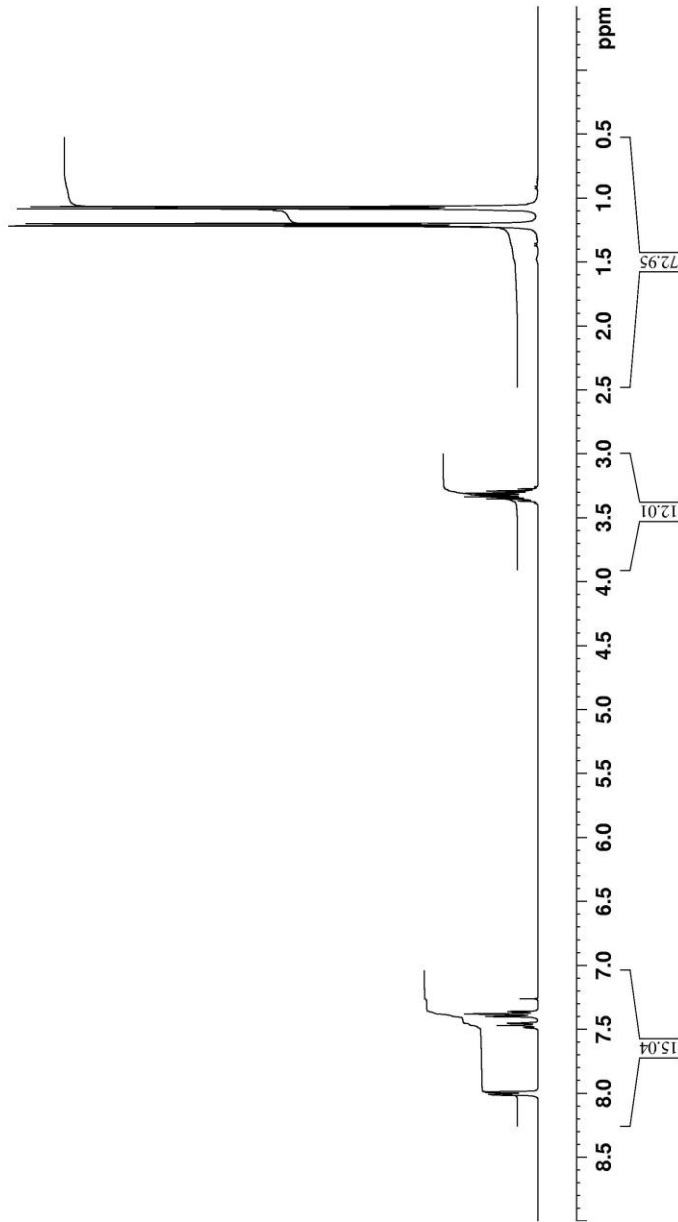

Current Data Parameters  
 NAME whh041714  
 EXPNO 10  
 PROCNO 1

F2 - Acquisition Parameters  
 Date\_ 20140417  
 Time 11.39  
 INSTRUM spect  
 PROBHD 5 mm QNP 1H/1  
 PULPROG zg30  
 TD 65536  
 SOLVENT CDCl3  
 NS 16  
 DS 2  
 SWH 8278.146 Hz  
 FIDRES 0.126314 Hz  
 AQ 3.9584243 sec  
 RG 64  
 DW 60.400 usec  
 DE 6.00 usec  
 TE 295.2 K  
 D1 1.00000000 sec  
 TD0 1

==== CHANNEL f1 =====  
 NUC1 1H  
 P1 10.10 usec  
 PL1 -6.00 dB  
 SFO1 400.1324710 MHz

F2 - Processing parameters  
 SI 32768  
 SF 400.1300092 MHz  
 EM EM  
 SSB 0  
 LB 0.30 Hz  
 GB 0  
 PC 1.00  
 SR 9.23 Hz

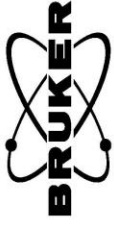

<sup>13</sup>C NMR

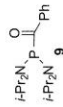

220.97  
220.74

141.00  
140.61  
132.26  
132.29  
128.24  
127.96  
127.85

77.48  
77.16  
76.84

49.54  
49.46

24.30  
23.89  
23.83

Current Data Parameters  
NAME whh041714  
EXPNO 12  
PROCNO 1

F2 - Acquisition Parameters

Date\_ 20140417  
Time 13.12  
INSTRUM spect  
PROBHD 5 mm QNP 1H/1  
PULPROG zgpg30  
TD 65536  
SOLVENT CDCl3  
NS 256  
DS 4  
SWH 26248.56 Hz  
FIDRES 0.631039 Hz  
AQ 1.1600372 sec  
RG 143.7  
DW 17.700 usec  
DE 6.00 usec  
TE 295.2 K  
D1 2.0000000 sec  
d11 0.0300000 sec  
DELTA 1.8999999 sec  
TD0 1

CHANNEL f1  
NUC1 <sup>13</sup>C  
P1 7.10 usec  
PL1 -6.00 dB  
SFO1 100.6233364 MHz

CHANNEL f2  
CPDPRG2 waltz16  
NUC2 <sup>1</sup>H  
PCPD2 100.00 usec  
PL2 -6.00 dB  
PL12 13.91 dB  
PL13 120.00 dB  
SFO2 400.1316005 MHz

F2 - Processing parameters  
SI 32768  
SF 100.6127568 MHz  
WDW EM  
SSE 0  
LB 1.00 Hz  
GB 0  
PC 1.40  
SR -12.24 Hz

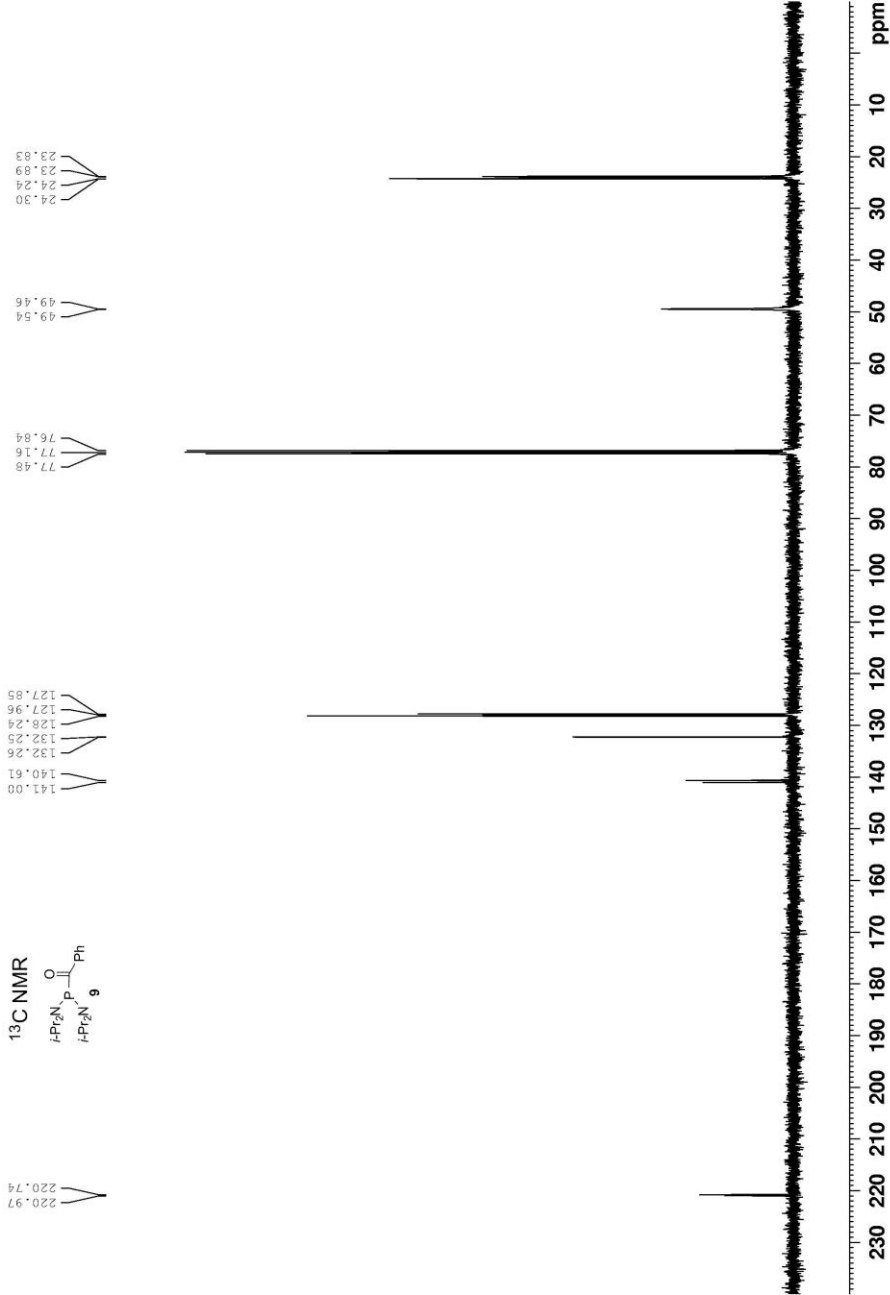

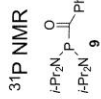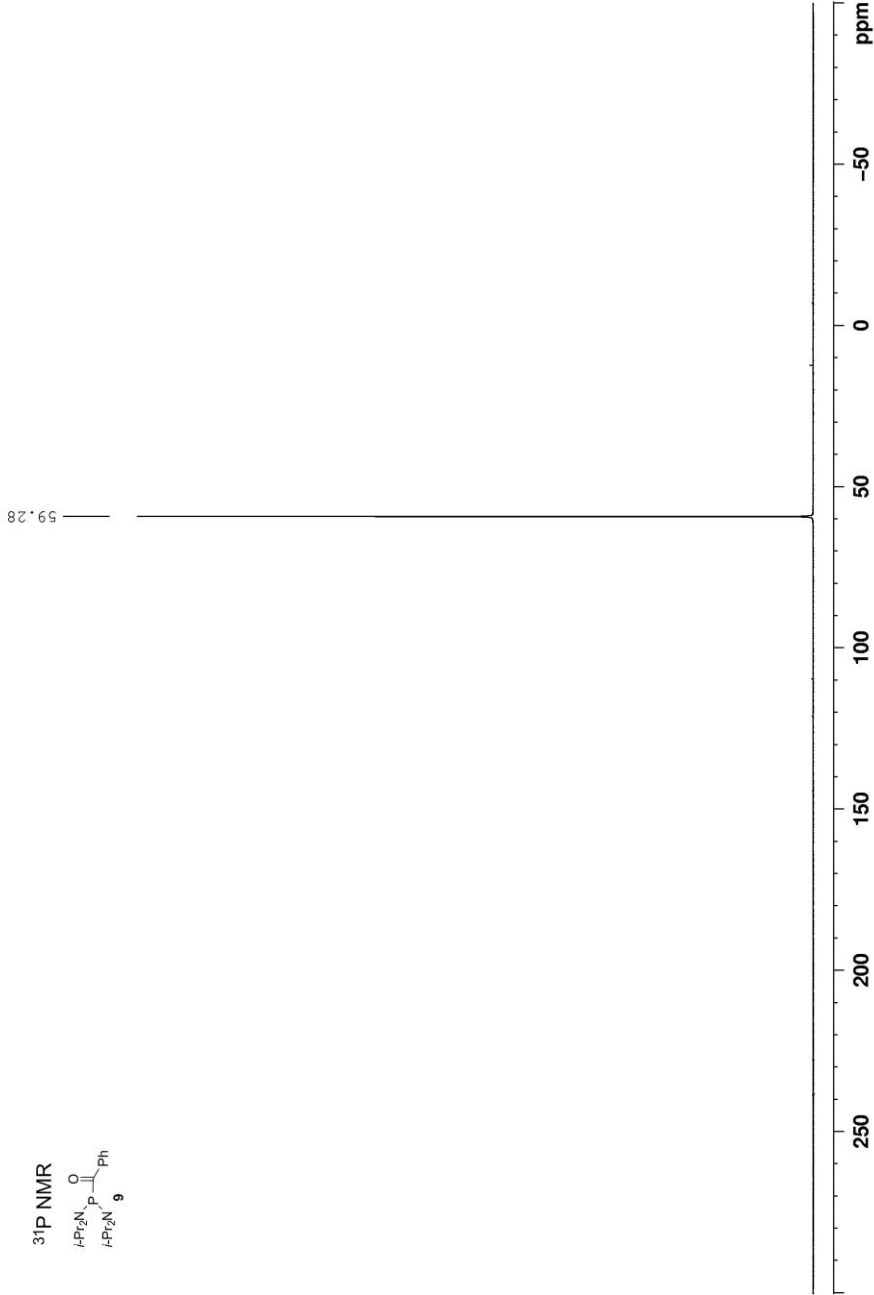

Current Data Parameters  
NAME whh041814  
EXPNO 11  
PROCNO 1

F2 - Acquisition Parameters  
Date\_ 20140418  
Time 11:54  
INSTRUM spect  
PROBHD 5 mm QNP 1H/1  
PULPROG zgpg30  
TD 65536  
SOLVENT CDCl3  
NS 512  
DS 4  
SWH 64035.06 Hz  
FIDRES 0.390856 Hz  
AQ 0.504872 sec  
RG 10321.3  
DW 7.700 usec  
DE 6.00 usec  
TE 295.2 K  
D1 2.0000000 sec  
d11 0.0300000 sec  
DELTA 1.8999999 sec  
TD0 1

===== CHANNEL f1 =====  
NUC1 <sup>31</sup>P  
P1 4.65 usec  
PL1 -6.00 dB  
SFO1 161.9917906 MHz

===== CHANNEL f2 =====  
CPDPRG2 waltz16  
NUC2 <sup>1</sup>H  
PCPD2 100.00 usec  
PL2 -6.00 dB  
PL12 13.31 dB  
PL13 120.00 dB  
SFO2 400.1316005 MHz

F2 - Processing parameters  
SI 32768  
SF 161.9755358 MHz  
WDW EM  
SBB 0  
LB 1.00 Hz  
GB 0  
PC 1.40  
SR -57.24 Hz



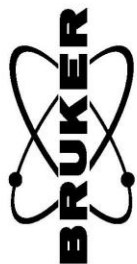

2D-HETCOR

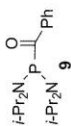

Current Data Parameters  
NAME whh041714  
EXPER 14  
PROCNO 1

F2 - Acquisition Parameters  
Date\_ 20140417  
Time\_ 14:44  
INSTRUM spect  
PROBHD 5 mm QNP 1H/1  
PULPROG hzgqzf  
SOLVENT CDCl3  
NS 8  
DS 4  
SWH 12166.140 Hz  
FIDRES 2.970080 Hz  
AQ 0.1683956 sec  
RG 413004  
DM 41.00 usec  
TE 295.2 K  
CNSTZ 145.0000000  
CNST11 3.0000000  
D1 1.95739806 sec  
d2 0.00344628 sec  
d3 0.00239885 sec  
d12 0.00020000 sec  
INO 0.00014640 sec

CHANNEL f1  
NUC1 13C  
P1 7.10 usec  
P2 14.20 usec  
PL1 0.0000 dB  
SFO1 100.6263882 MHz  
CHANNEL f2  
CPDPRG2 waitz16  
NUC2 13C  
P3 10.10 usec  
PCPDZ 100.00 usec  
PL2 -6.00 dB  
SFO2 400.1317427 MHz

F1 - Acquisition Parameters  
TD 128  
SFO1 400.1318 MHz  
FIDRES 26.682035 Hz  
SW 8.535 ppm  
FMODE QF  
F2 - Processing parameters  
SI 2048  
SF 100.617208 MHz  
WDW QSINE  
SSB 2  
LB 0.00 Hz  
GB 0.00 Hz  
EC 1.40  
SR 0.00 Hz

F1 - Processing parameters  
SI 1024  
SF 400.1300000 MHz  
WDW QSINE  
SSB 0.00 Hz  
LB 0.00 Hz  
GB 0

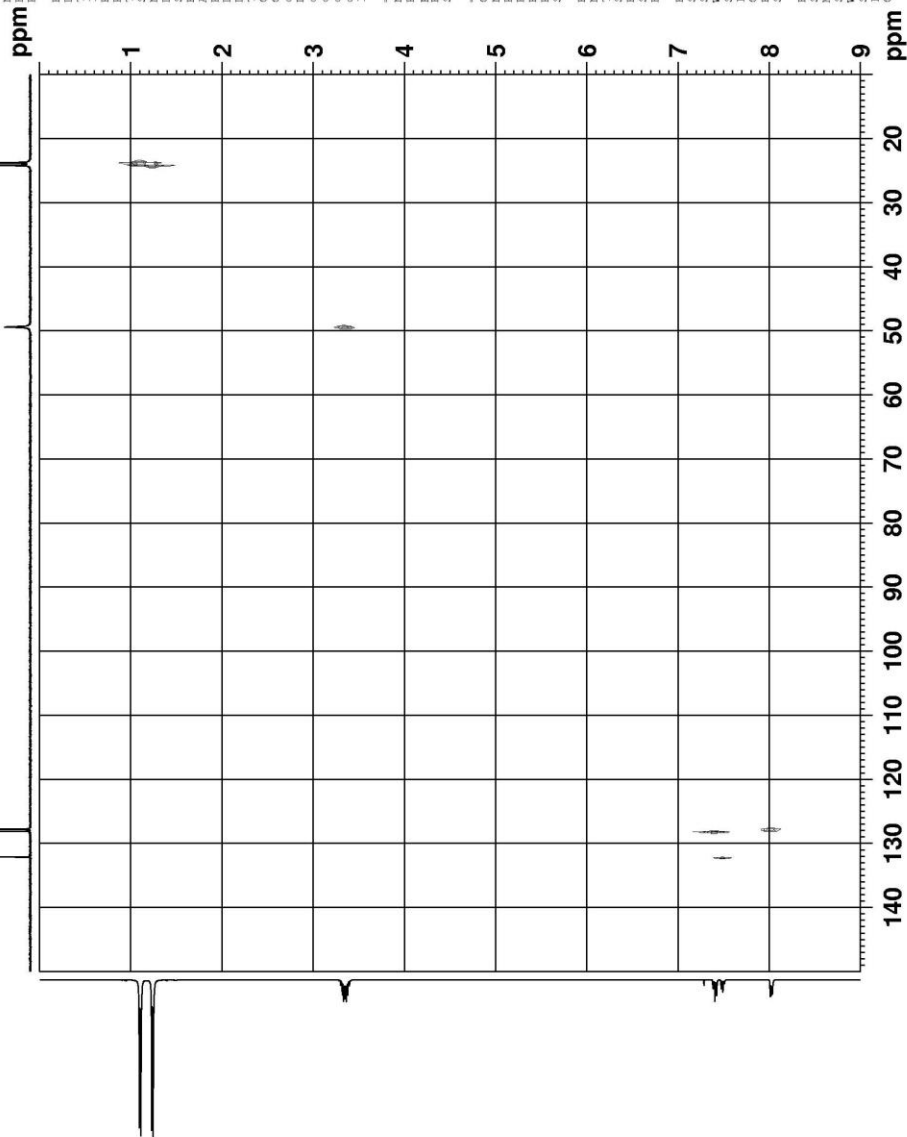

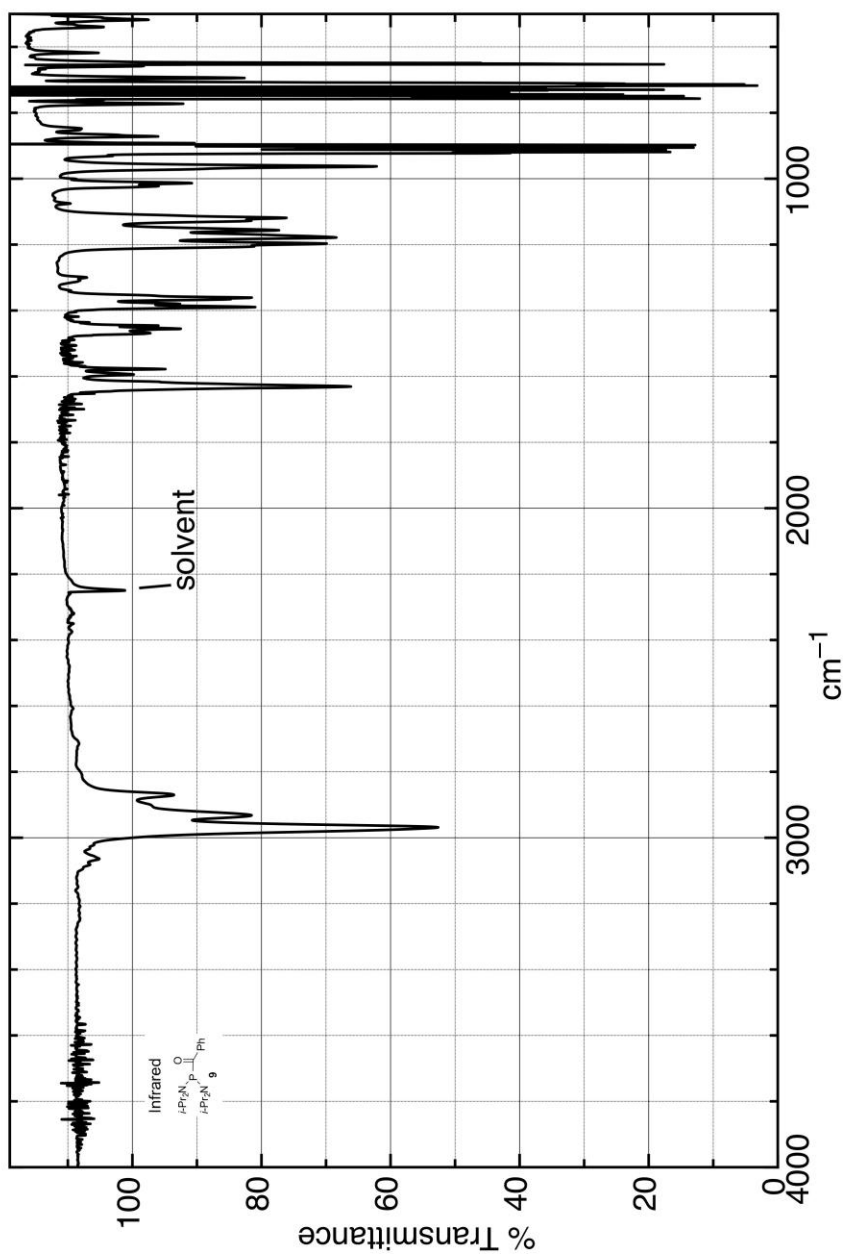

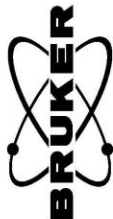

NAME whh041014

EXPNO 10  
 PROCNO 1  
 Date\_ 20140410  
 Time 12.17  
 INSTRUM spect  
 PROBHD 5 mm QXI 1H Z-  
 PULPROG zg30  
 TD 65536  
 SOLVENT CDC13  
 NS 16  
 DS 2  
 SWH 10330.572 Hz  
 SFR 0.157632 Hz  
 FIDRES 3.1719923 sec  
 RG 64  
 DW 48.400 usec  
 DE 6.50 usec  
 TE 298.2 K  
 D1 1.00000000 sec  
 TDO 1

CHANNEL f1  
 NUC1 1H  
 P1 9.10 usec  
 PL1 3.00 dB  
 PL1W 15.10710526 W  
 SF01 500.1330985 MHz  
 ST 0.7758 MHz  
 SC 500.1330985 MHz  
 MCOM 0  
 SSB 0  
 LB 0.30 Hz  
 GB 0  
 PC 1.00  
 SR 12.59 Hz

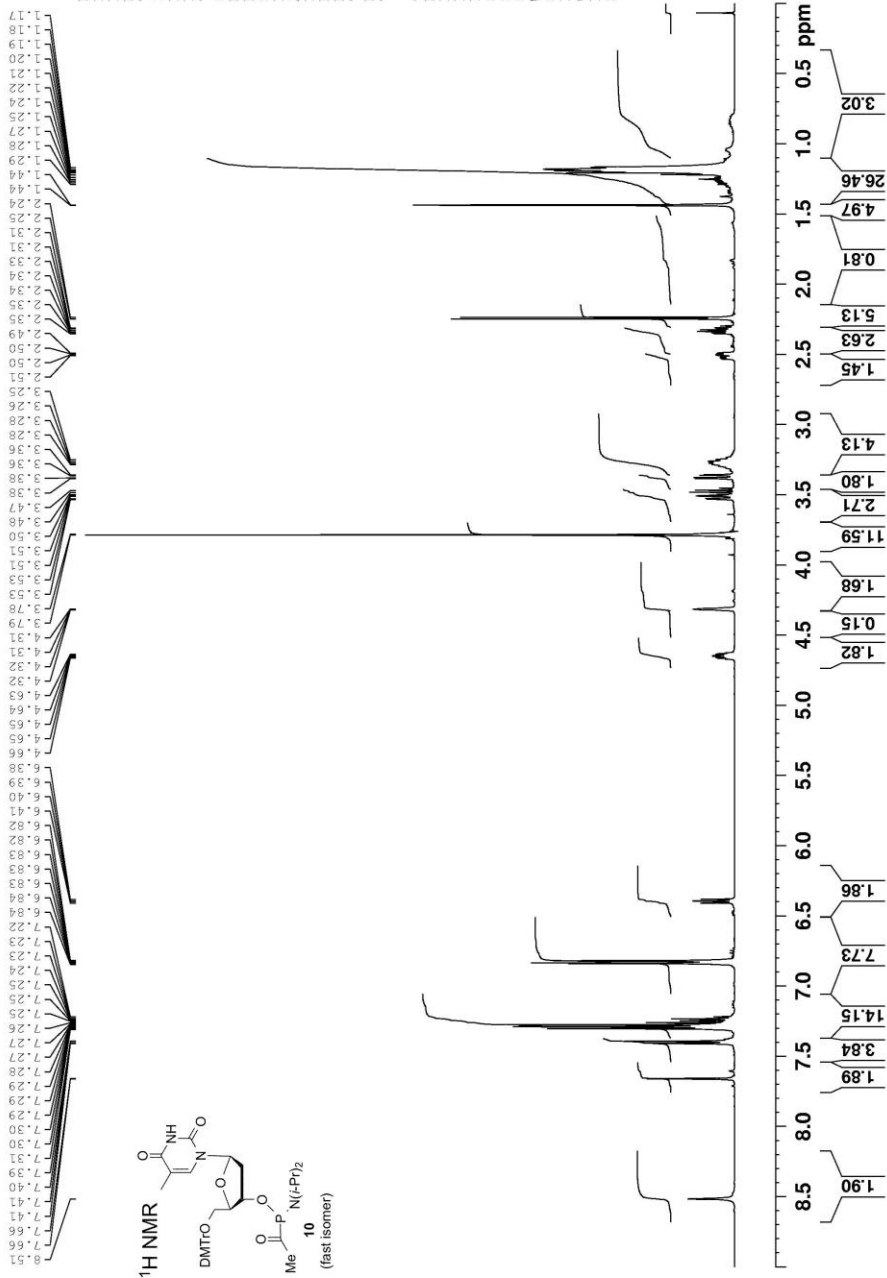



```

NAME      wthr041014
EXPNO     11
PROCNO    1
Date_     20140410
Time      13.16
INSTRUM   spect
PROBHD    5 mm QXI 1H Z-
PULPROG   zgpg30
TD         65536
SOLVENT   CDCl3
NS         1024
DS         4
SWH        31250.000 Hz
FIDRES     0.476837 Hz
AQ         1.0486259 sec
RG         575
RW         16.000 usec
DE         683.333 K
TE         298.2
D1         2.00000000 sec
D1.1      0.03000000 sec
TD0        1

===== CHANNEL f1 =====
NUC1       13C
P1         14.50 usec
PL1        -1.00 dB
PL1W       132.81565857 W
SFO1       125.7716224 MHz

===== CHANNEL f2 =====
CPDPRG2   waltz16
NUC2       1H
PCPD2     87.00 usec
PL2        3.00 dB
PL2W       22.00 dB
PL3        22.00 dB
PL3W       15.10710526 W
PL12W     0.19018719 W
PL13W     0.19018719 W
SFO2       500.1320005 MHz
SI         32768
SF         125.7577722 MHz
WDW        EM
SSB        0
LB         1.00 Hz
GB         0
PC         1.40
SR         -16.78 Hz
  
```

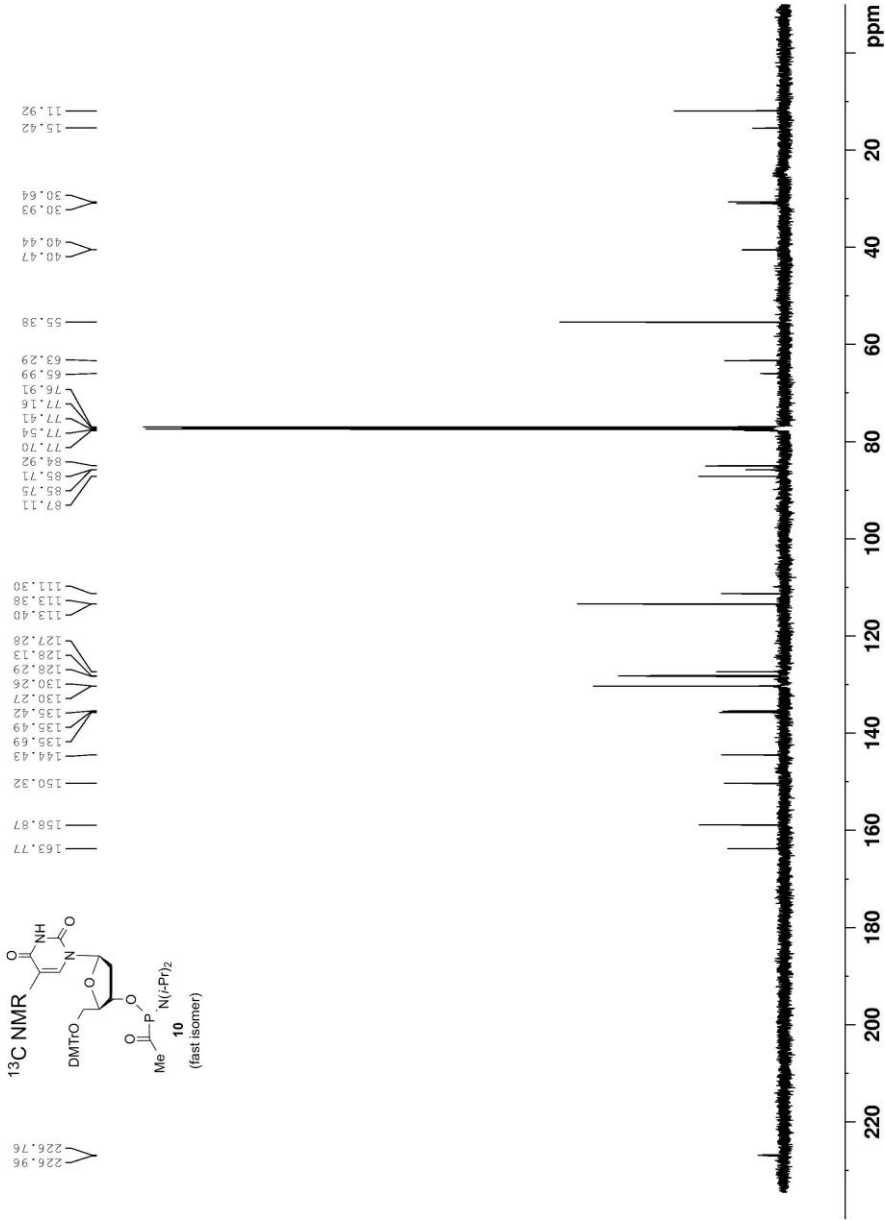

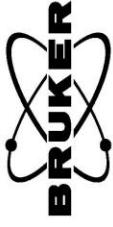

Current Data Parameters  
NAME whh040114  
EXPNO 11  
PROCNO 1

F2 - Acquisition Parameters  
Date\_ 20140401  
Time 15.35  
INSTRUM spect  
PROBHD 5 mm QNP 1H/1  
PULPROG zgpg30  
TD 65536  
SOLVENT CDCl3  
NS 512  
DS 4  
SWH 64035.06 Hz  
FIDRES 0.390856 Hz  
AQ 0.504872 sec  
RG 23170.5  
DW 7.700 usec  
DE 6.00 usec  
TE 298.2 K  
D1 2.0000000 sec  
d11 0.0300000 sec  
DELTA 1.8999999 sec  
TD0 1

CHANNEL f1 31p  
NUC1 31p  
P1 4.65 usec  
PL1 -6.00 dB  
SFO1 161.9917906 MHz

CHANNEL f2 waltz16  
CPDPRG2  
NUC2 1H  
PCPD2 100.00 usec  
PL2 -6.00 dB  
PL12 13.91 dB  
PL13 120.00 dB  
SFO2 400.1316005 MHz

F2 - Processing parameters  
SI 32768  
SF 161.9755358 MHz  
WDW EM  
SBB 0  
LB 1.00 Hz  
GB 0  
PC 1.40  
SR -57.24 Hz

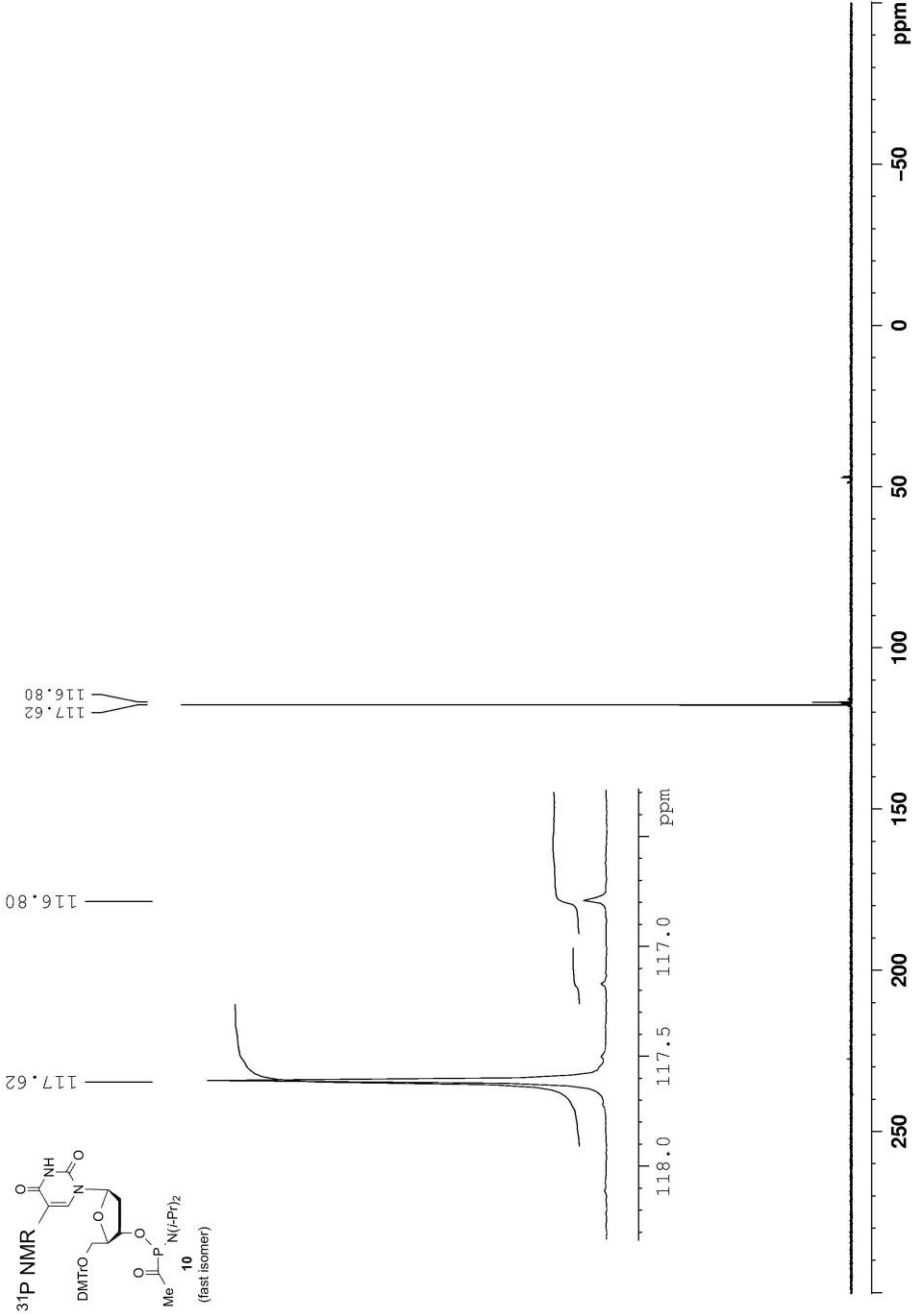

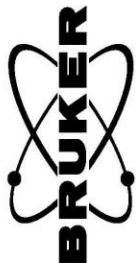

Current Data Parameters  
 NAME whh041014  
 EXPNO 11  
 PROCNO 1

F2 - Acquisition Parameters  
 Date\_ 20140410  
 Time 16.35  
 INSTRUM spect  
 PROBRD 5 mm QNP 1H/1  
 PULPROG ccsygf90  
 TD 2048  
 SOLVENT CDCl3  
 NS 8  
 DS 4  
 SWH 3654.371 Hz  
 FIDRES 1.784654 Hz  
 AQ 0.2802164 sec  
 RG 161.3  
 DW 136.800 usec  
 DE 6.00 usec  
 TE 296.2 K  
 d0 0.0000300 sec  
 D1 1.96845996 sec  
 INO 0.00027360 sec

===== CHANNEL f1 =====  
 NUC1 1H  
 P1 10.10 usec  
 PL1 -6.00 dB  
 SF01 400.1318556 MHz

F1 - Acquisition Parameters  
 ND0 1  
 TD 256  
 SFO1 400.1319 MHz  
 FIDRES 14.277229 Hz  
 SW 9.134 ppm  
 FMODE QF

F2 - Processing parameters  
 SI 1024  
 SF 400.1300371 MHz  
 WDW SINE  
 SSB 0  
 LB 0.00 Hz  
 GB 0  
 PC 1.40  
 SR 37.11 Hz

F1 - Processing parameters  
 SI 1024  
 MC2 QF  
 SF 400.1300371 MHz  
 WDW SINE  
 SSB 0  
 LB 0.00 Hz  
 GB 0

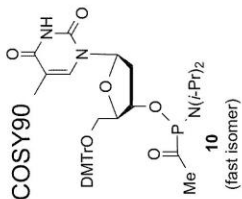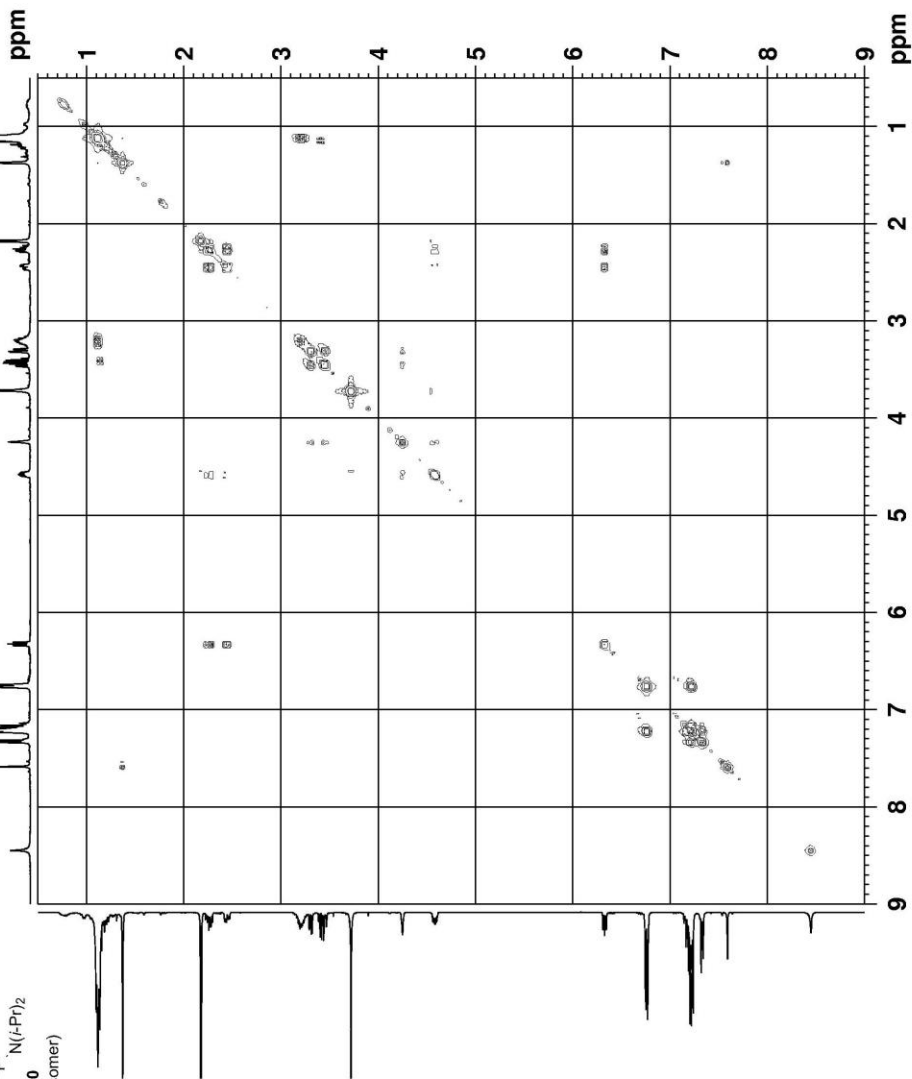

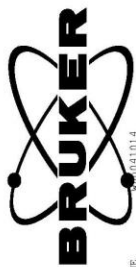

```

NAME          20140410
EXPNO         1
PROCNO        1
Date_         20140410
Time              14:37
PROBHD        5 mm QXI 1H 2
PULPROG       hsqcetps12
SOLVENT       CDCl3
NS            2
DS            2
SFO1          125.7672177 MHz
SFO2          600.1313965 MHz
AQ            0.0768500 sec
RG            65.50 usec
DE            6.50 usec
D0            0.0000000 sec
D1            0.0000000 sec
D2            0.0000000 sec
D3            0.0000000 sec
D4            0.0000000 sec
IN0            0.00002400 sec
ZDELTA        0.0000000 sec
===== CHANNEL f1 =====
NUC1           13C
P1            12.00 usec
PCPD2         18.20 usec
P2            1000.00 usec
PL1           15.10710520 dB
PL1M          500.1330065 MHz
SFO1          125.7672177 MHz
===== CHANNEL f2 =====
CPDPRG2       gprp
NUC2           1H
P1            12.00 usec
PCPD2         18.20 usec
P2            1000.00 usec
PL1           15.10710520 dB
PL1M          500.1330065 MHz
SFO1          125.7672177 MHz
===== GRADIENT CHANNEL =====
GENDM2        SINE-100
GENAM2        SINE-100
GENDM3        SINE-100
GENAM3        SINE-100
GENDM4        SINE-100
GENAM4        SINE-100
GZ22         20.10 %
GZ23         11.00 %
GZ24         11.00 %
P19          1000.00 usec
P20          600.00 usec
NUC3          31P
SFO3          125.7672177 MHz
SFO4          600.1313965 MHz
===== CHANNEL f3 =====
FIDRES        81.380234 Hz
F2            125.7672177 MHz
F3            600.1313965 MHz
FRMCOE        Echo-NetEcho
SI            1024
SF            125.7577722 MHz
SFO5          500.1313965 MHz
SSB           2
LB            0.00 Hz
PC            1.40
SR            12.59 Hz
MC2           echo-NetEcho
SF            125.7577722 MHz
SFO6          500.1313965 MHz
SSB           2
LB            0.00 Hz
  
```

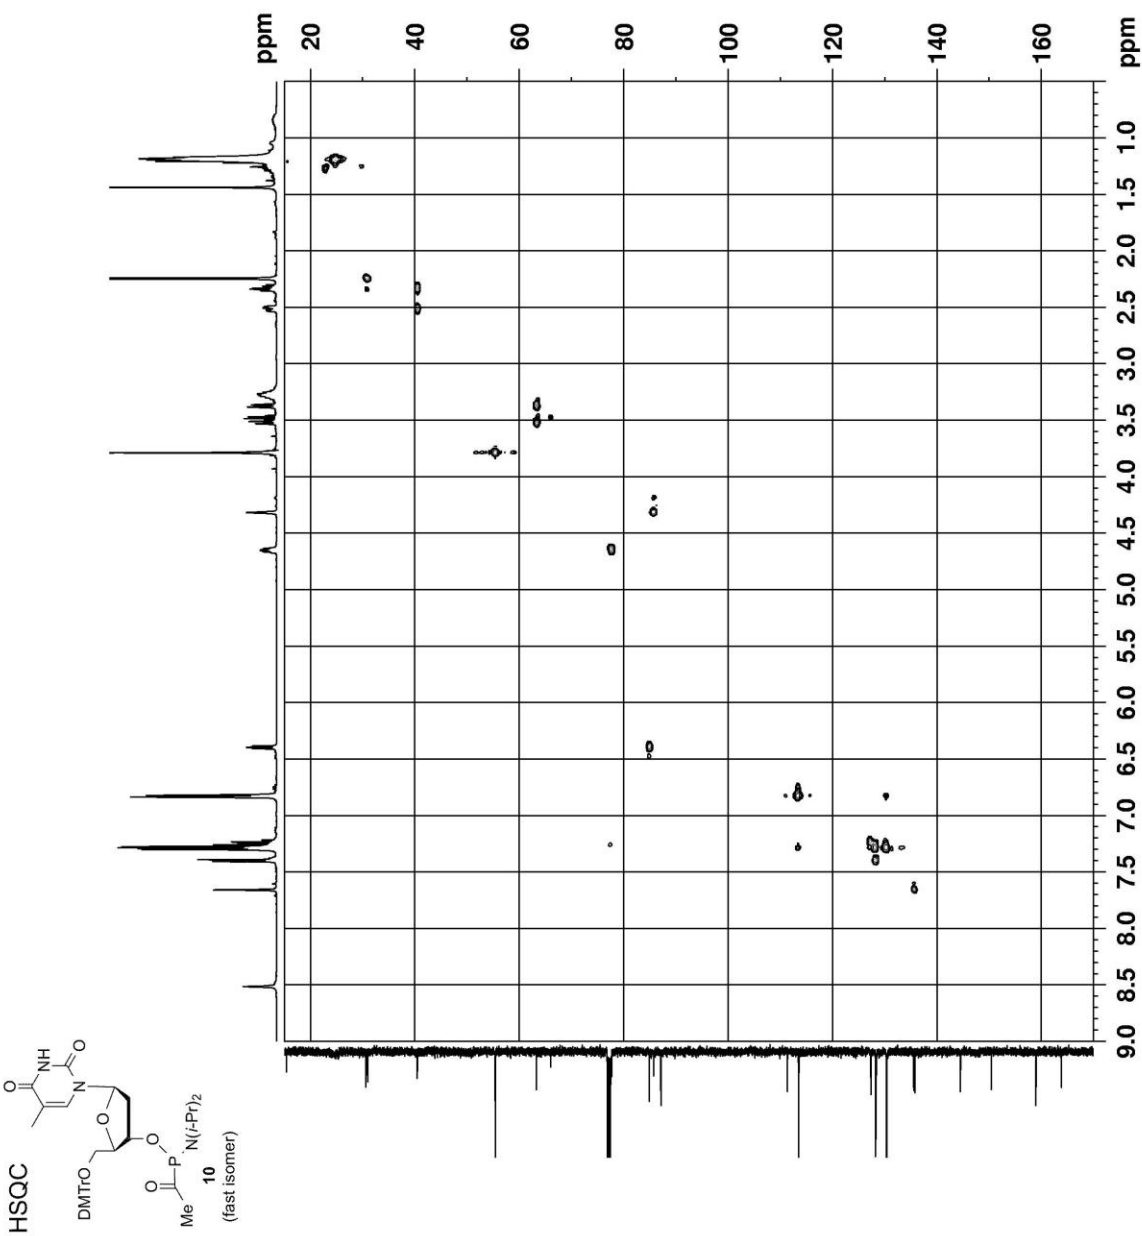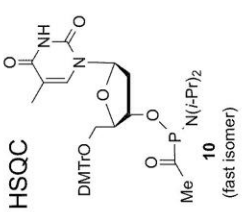

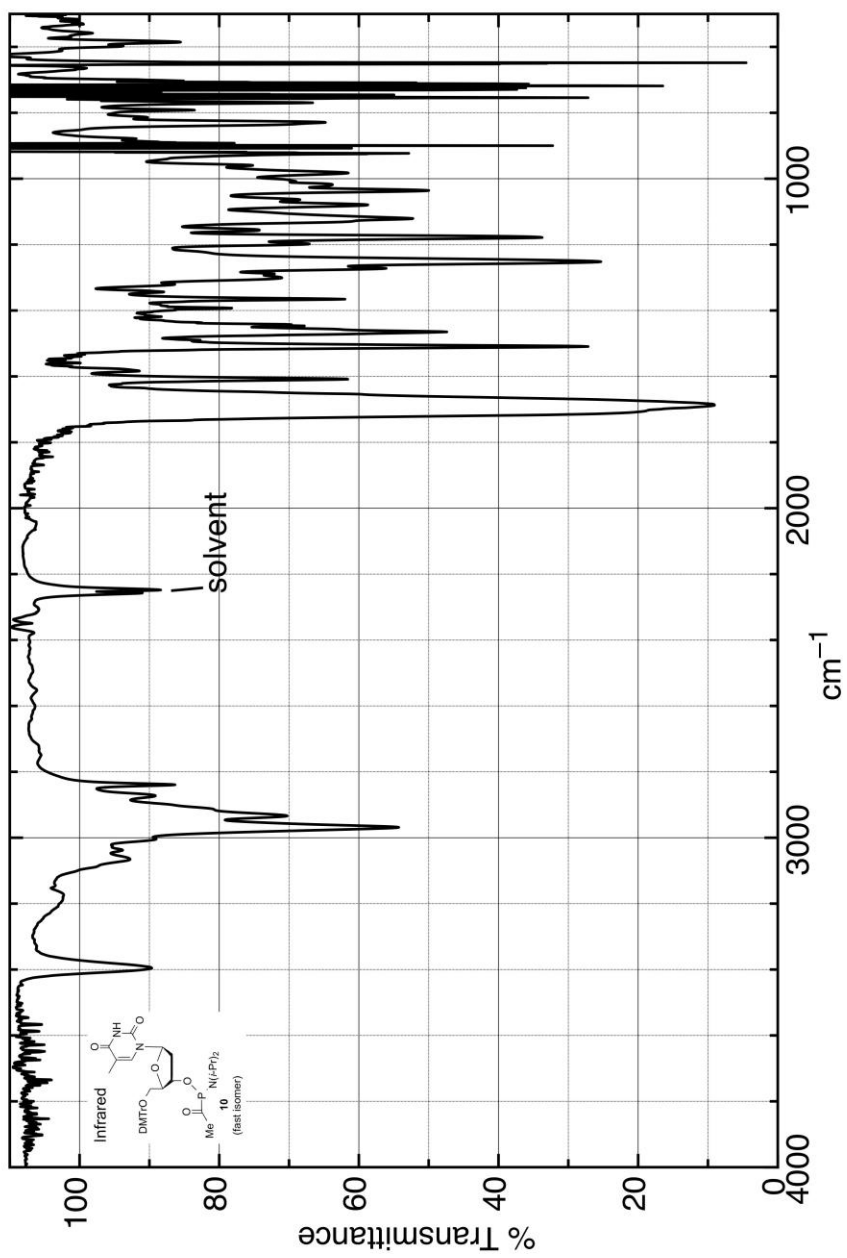



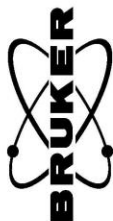

```

NAME          whh092414
EXPNO         10
PROCNO        1
Date_         20140924
Time_         10.28
INSTRUM       spect
PROBHD        5 mm QXI 1H Z-
PULPROG       zg30
TD            65536
SOLVENT       CDCl3
NS            16
DS            2
SFR           10330.572 Hz
AQ            0.157632 Hz
RG            3.1719923 sec
RG            64
DE            48.400 usec
TE            298.2 K
D1            1.00000000 sec
TDO           1
=====
CHANNEL f1
=====
NUC1          1H
P1            9.10 usec
PL1           3.00 dB
PL12          15.10710526 W
SFO1          500.1330985 MHz
SI            32778
SF            500.13309158 MHz
MCOM         0
SSB           0
LB            0.30 Hz
GB            0
PC            1.00
SR            13.91 Hz
  
```

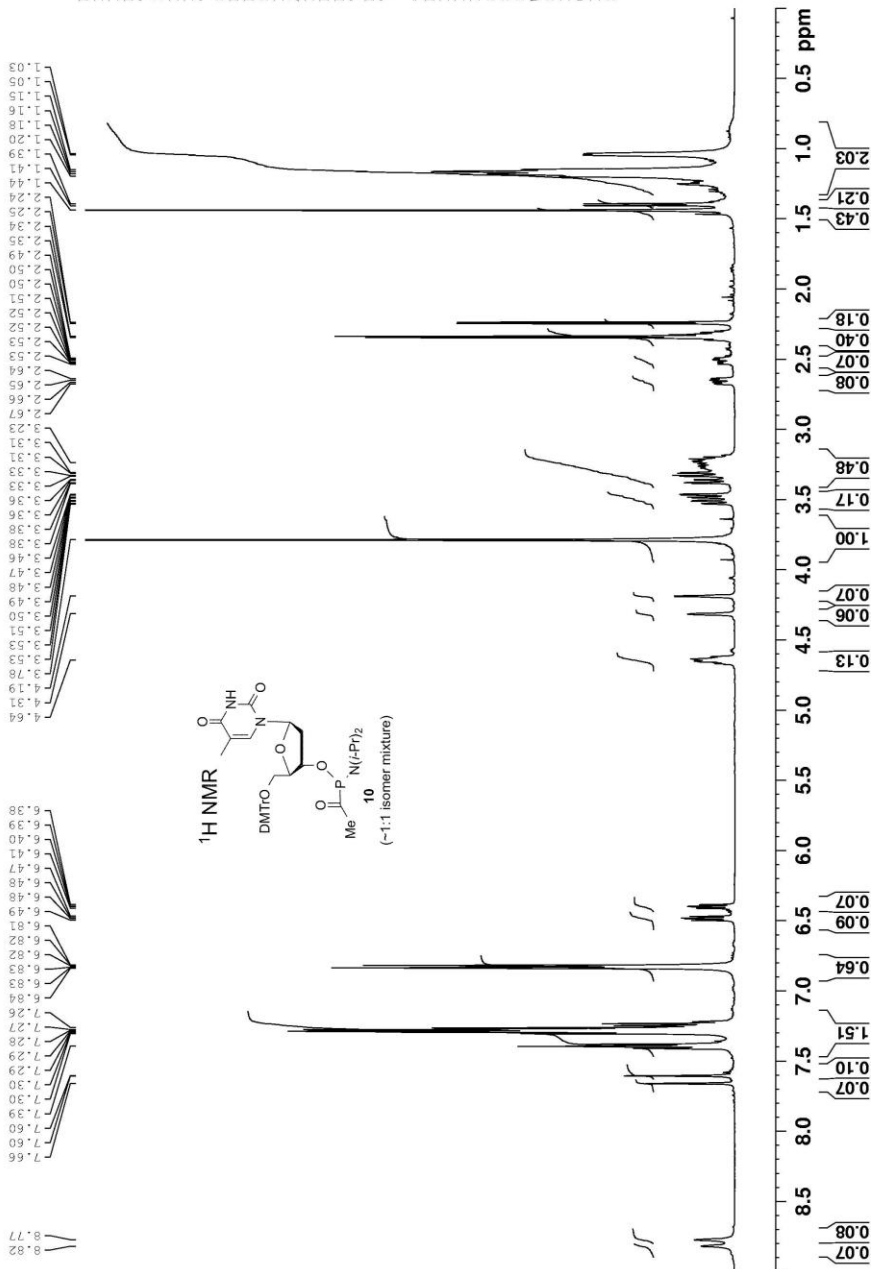

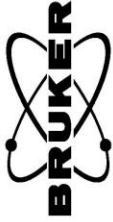

```

NAME      wth092414
EXPNO     1
PROCNO    1
Date_     20140924
Time      12.22
INSTRUM   spect
PROBHD    5 mm QXI 1H X
PULPROG   zgpg30
TD         65536
SOLVENT   CDCl3
NS         2048
DS         4
SWH        35714.285 Hz
FIDRES     0.544957 Hz
AQ         0.9175340 sec
RG         456
DE         14.000 usec
TE         298.2 K
D1         2.00000000 sec
D1.1      0.03000000 sec
TD0        1

===== CHANNEL f1 =====
NUC1       13C
P1         15.50 usec
PL1        -1.00 dB
PL1W       132.81565857 W
SFO1       125.7716224 MHz

===== CHANNEL f2 =====
CPDPRG2   waltz16
NUC2       1H
PCPD2     80.00 usec
PL2        3.00 dB
PL2W       1.00 dB
PL3        21.88 dB
PL3W       120.00 dB
PL2W       15.10719526 W
PL12W      0.19551556 W
PL13W      0.00000000 W
SFO2       500.1320005 MHz
SI         32768
SF         125.7577745 MHz
WDW        EM
SSB        0
LB         1.00 Hz
GB         0
PC         1.40
SR         -14.54 Hz
  
```

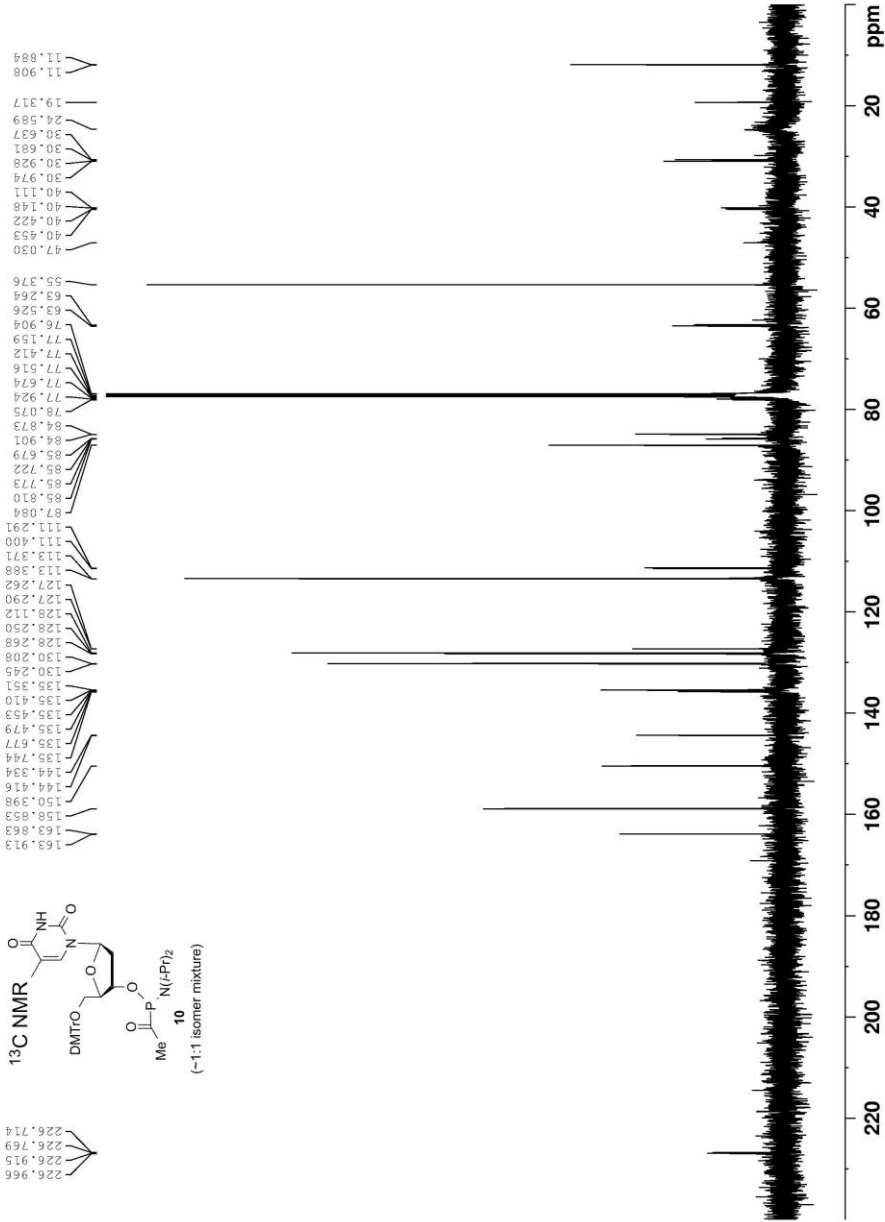

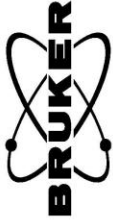

Current Data Parameters  
 NAME whh040214  
 EXPNO 11  
 PROCNO 1

F2 - Acquisition Parameters  
 Date\_ 20140402  
 Time 21.59  
 INSTRUM spect  
 PROBHD 5 mm QNP 1H/1  
 PULPROG zgpg30  
 TD 65536  
 SOLVENT CDCl3  
 NS 512  
 DS 4  
 SWH 64035.06 Hz  
 FWHM 0.390856 Hz  
 PDRES 0.504872 sec  
 AQ 2.064275 sec  
 RG 7.700 usec  
 DW 6.00 usec  
 DE 299.2 K  
 TE 2.0000000 sec  
 D1 0.0300000 sec  
 DELTA 1.8999999 sec  
 TD0 1

CHANNEL f1 31p  
 P1 4.65 usec  
 PL1 -6.00 dB  
 SFO1 161.9917906 MHz

CHANNEL f2 waltz16  
 CPDPRG2  
 NUC2 1H  
 PCPD2 100.00 usec  
 PL2 -6.00 dB  
 PL12 13.91 dB  
 PL13 120.00 dB  
 SFO2 400.1316005 MHz

F2 - Processing parameters  
 SI 32768  
 SF 161.9755358 MHz  
 WDW EM  
 SSB 0  
 LB 1.00 Hz  
 GB 0  
 PC 1.40  
 SR -57.24 Hz

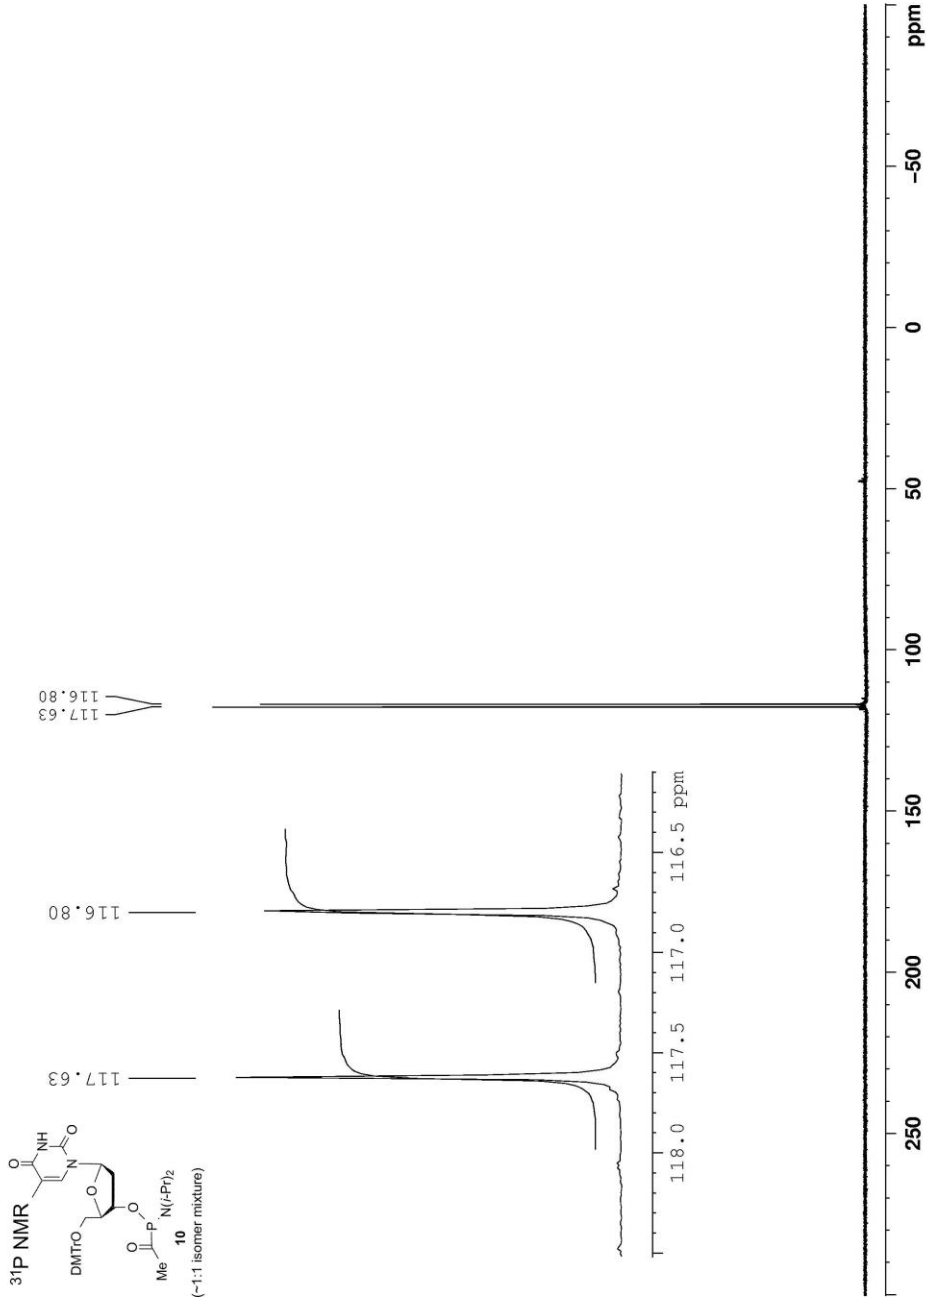

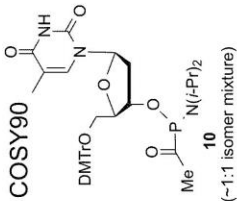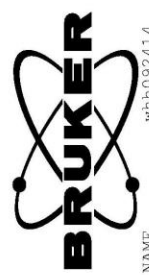

```

NAME whh092414
EXPNO 1
PROCNO 14
Date_ 20140324
Time 14.02
INSTRUM spect
PROBHD 5 mm QXI 1H Z-
PULPROG cosygf90
TD 2048
SOLVENT CDCl3
NS 8
DS 4
SWH 5154.639 Hz
FIDRES 2.516914 Hz
AQ 0.1987060 sec
RG 71.8
DW 97.000 usec
DE 6.50 usec
TE 298.2 K
D0 0.00000300 sec
D1 2.00000000 sec
IN0 0.00019395 sec
===== CHANNEL f1 =====
NUC1 1H
P1 9.10 usec
PL1 3.00 dB
PL1W 15.10710526 W
SF01 500.1323164 MHz
NDO 1
TD 256
SF01 500.1323 MHz
FIDRES 20.142307 Hz
SW 10.310 ppm
FnmODE QF
SI 1024
SF 500.1300139 MHz
WDW SINE
SSB 0
LB 0.00 Hz
GB 0
PC 1.40
SR 13.91 Hz
SI 1024
MC2 QF
SF 500.1300139 MHz
WDW SINE
SSB 0
LB 0.00 Hz
GB 0

```

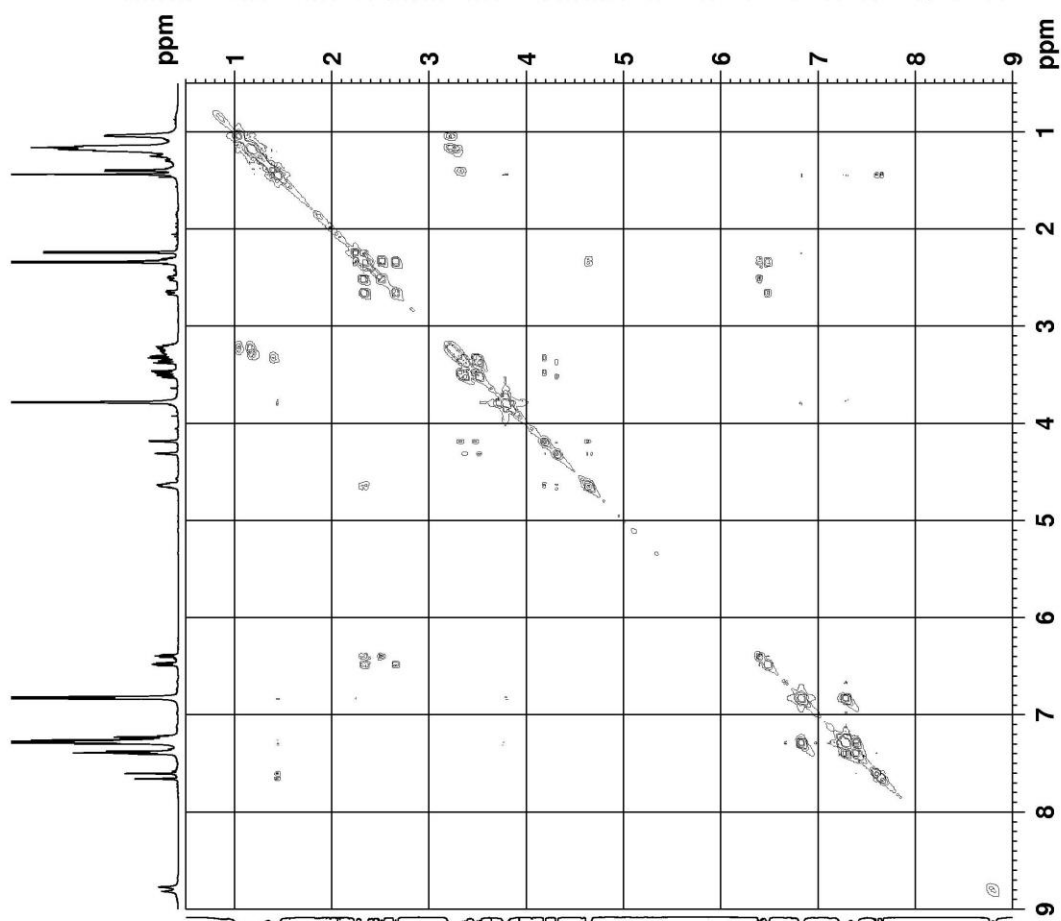



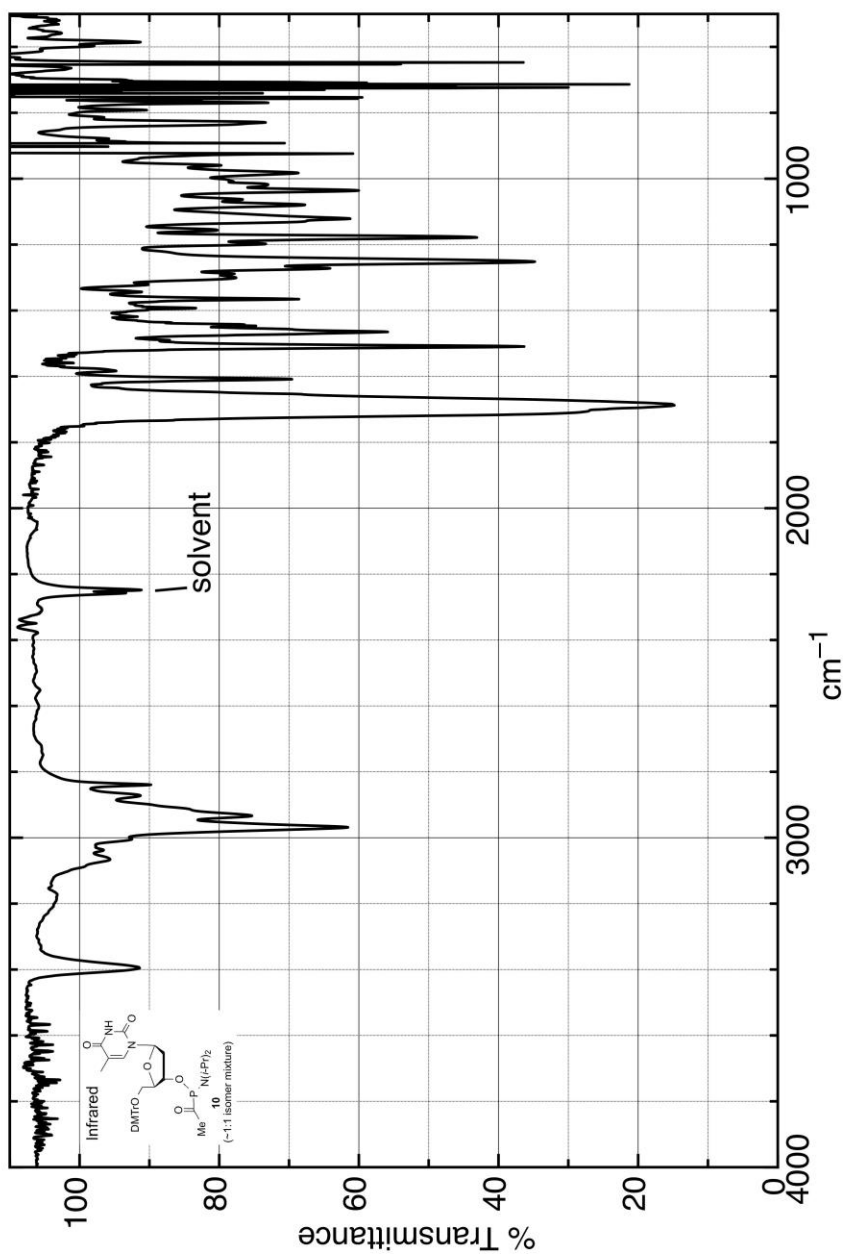

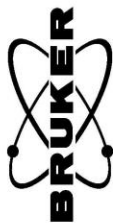

```

NAME          whhi00814
EXPNO         10
PROCNO        1
Date_         20141008
Time          10.39
INSTRUM       spect
PROBHD        5 mm QXI 1H Z-
PULPROG       zg30
TD            65536
SOLVENT       CDCl3
NS            16
DS            2
SFR           10330.572 Hz
AQ           0.157632 Hz
RG           3.1719923 sec
RG           64
DE           48.400 usec
TE           298.2 K
D1           1.00000000 sec
TDO           1
=====
CHANNEL f1
NUC1          1H
P1            9.10 usec
PL1           3.00 dB
PL12          15.10710526 W
SFO1          500.1330985 MHz
SI            32778
SF            500.13309128 MHz
MCOM         0
SSB          0
LB           0.30 Hz
GB           0
PC           1.00
SR           12.48 Hz
  
```

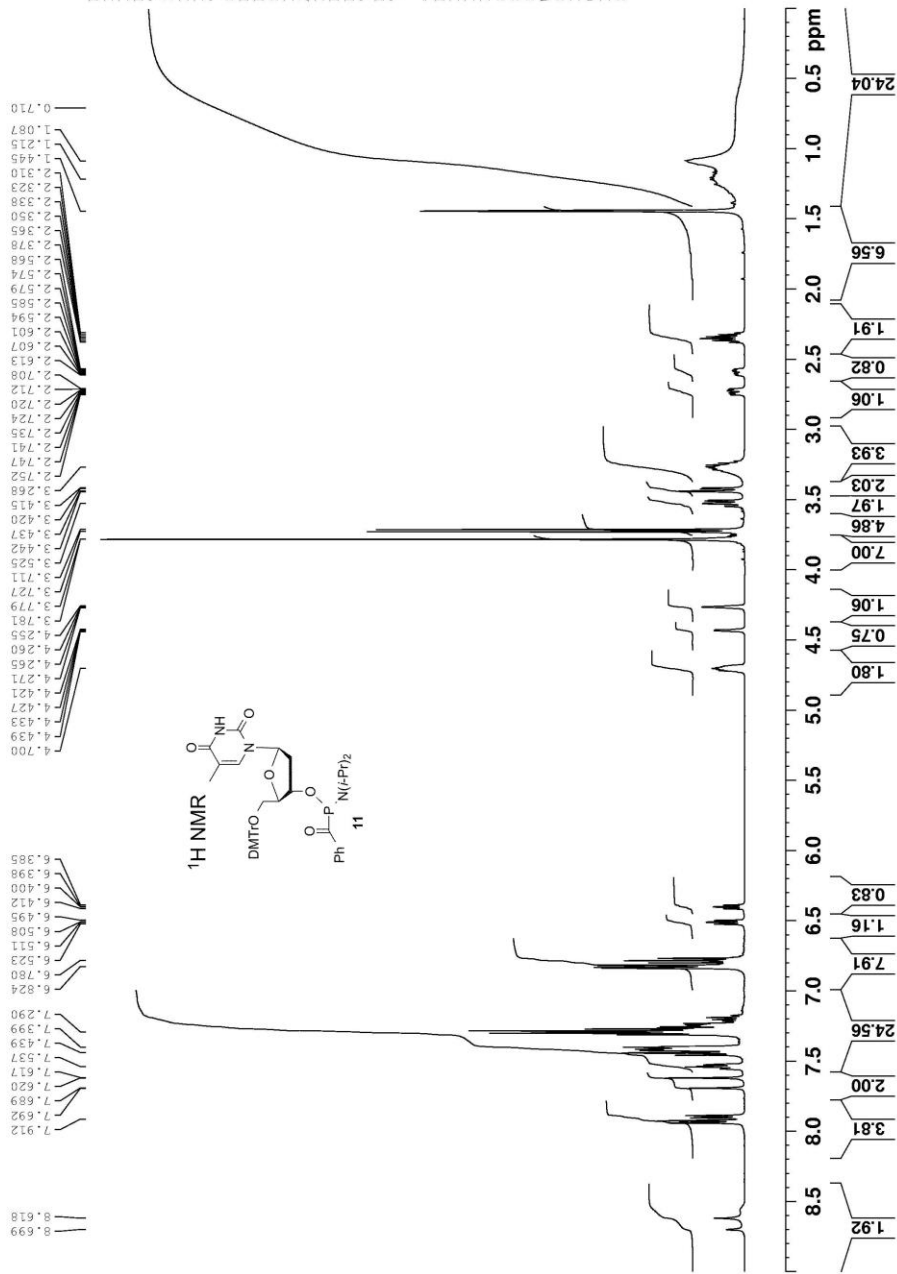

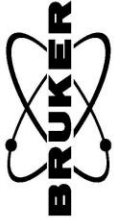

```

NAME      whh100814
EXPNO     11
PROCNO    1
Date_     20141008
Time      14.10
INSTRUM   spect
PROBHD    5 mm QXI 1H Z-
PULPROG   zgpg30
TD         65536
SOLVENT   CDCl3
NS         4096
DS         4
SWH        35714.285 Hz
FIDRES     0.544957 Hz
AQ         0.9175340 sec
RG         456
DE         14.000 usec
TE         298.2 K
D1         2.00000000 sec
D1.1      0.03000000 sec
TD0        1

===== CHANNEL f1 =====
NUC1       13C
P1         15.50 usec
PL1        -1.00 dB
PL1W       132.81565857 W
SFO1       125.7716224 MHz

===== CHANNEL f2 =====
CPDPRG2    waltz16
NUC2       1H
PCPD2      80.00 usec
PL2         3.00 dB
PL12        21.88 dB
PL13        120.00 dB
PL1W        15.10719526 W
PL12W       0.19551556 W
PL13W       0.00000000 W
SFO2       500.1320005 MHz
SI         32768
SF         125.7577745 MHz
WDW         EM
SSB         0
LB         1.00 Hz
GB         0
PC         1.40
SR         -14.52 Hz
  
```

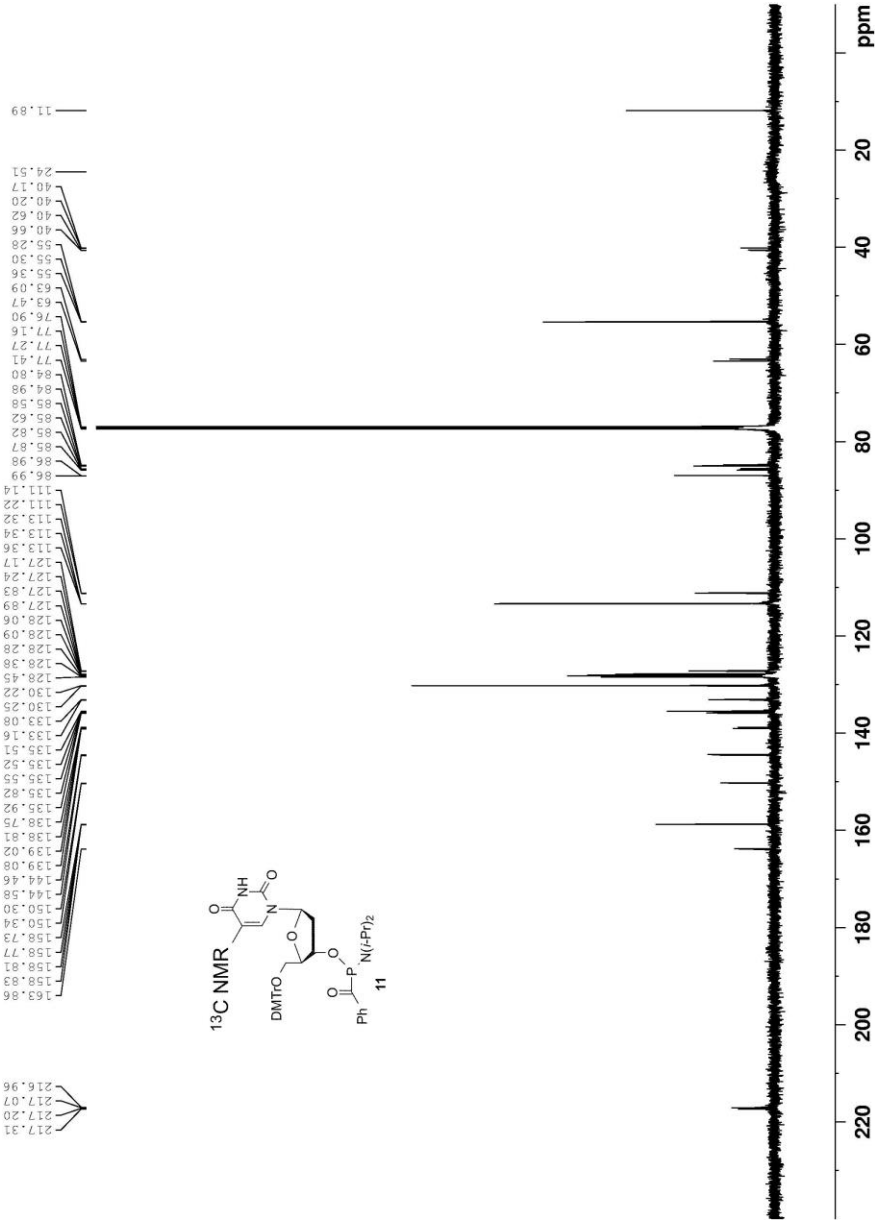



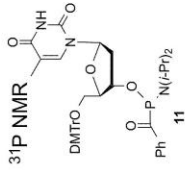

Current Data Parameters  
NAME whh091814  
EXPNO 31  
PROCNO 1

F2 - Acquisition Parameters  
Date\_ 20140919  
Time 16.16  
INSTRUM spect  
PROBHD 5 mm QNP 1H/1  
PULPROG zgpg30  
TD 65536  
SOLVENT CDCl<sub>3</sub>  
NS 512  
DS 4  
SWH 64935.06 Hz  
FIDRES 0.390856 Hz  
AQ 0.504872 sec  
RG 18390.4  
DW 7.700 usec  
DE 6.00 usec  
TE 293.2 K  
D1 2.0000000 sec  
d11 0.0300000 sec  
DELTA 1.8999999 sec  
TD0 1

CHANNEL f1 31p  
NUC1 31p  
P1 4.65 usec  
PL1 -6.00 dB  
SFO1 161.9917906 MHz

CHANNEL f2 waltz16  
CPDPRG2  
NUC2 1H  
PCPD2 100.00 usec  
PL2 -6.00 dB  
PL12 14.09 dB  
PL13 120.00 dB  
SFO2 400.1316005 MHz

F2 - Processing parameters  
SI 32768  
SF 161.9755358 MHz  
WDW EM  
SBB 0  
LB 1.00 Hz  
GB 0  
PC 1.40  
SR -57.24 Hz

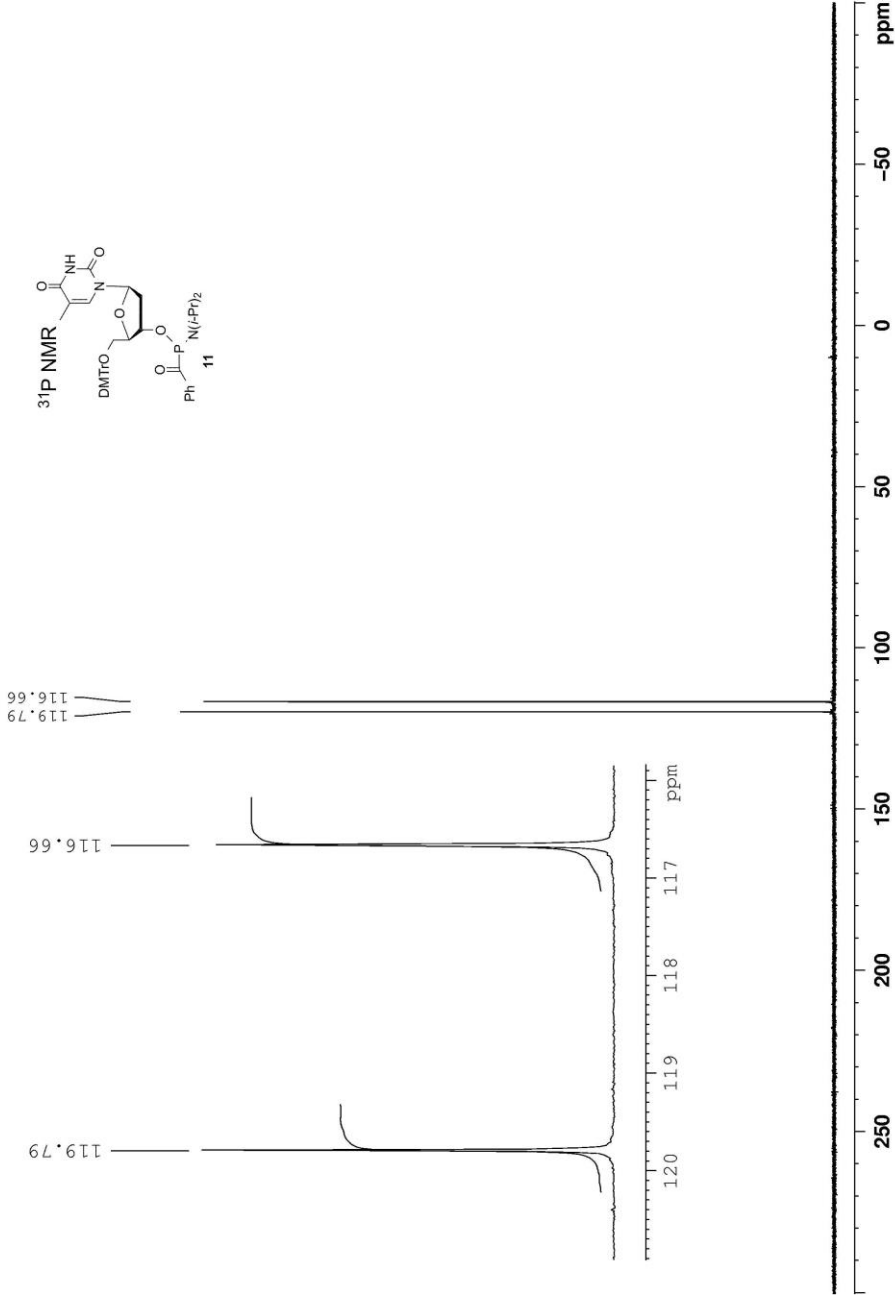

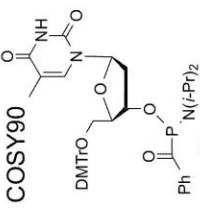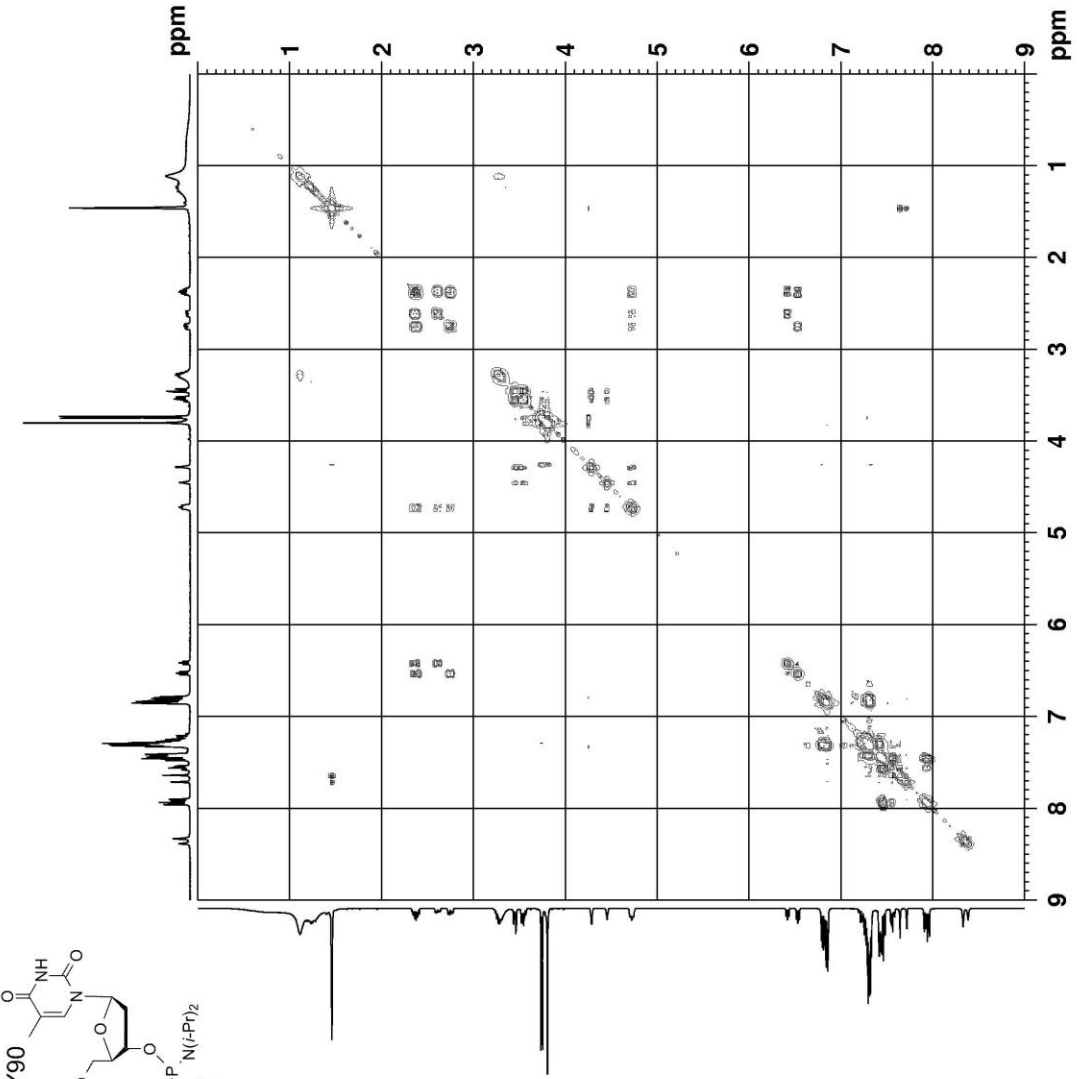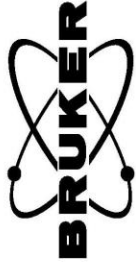

Current Data Parameters  
 NAME whh091814  
 EXPNO 65  
 PROCNO 1

F2 - Acquisition Parameters  
 Date\_ 20140919  
 Time 21.08  
 INSTRUM spect  
 PROBRD 5 mm QNP 1H/1  
 PULPROG ccsygf90  
 TD 2048  
 SOLVENT CDCL3  
 NS 8  
 DS 4  
 SWH 3810.376 Hz  
 FIDRES 1.860828 Hz  
 AQ 0.2687476 sec  
 RG 203.2  
 DW 131.200 usec  
 DE 6.00 usec  
 TE 293.2 K  
 d0 0.0000300 sec  
 d1 1.98074806 sec  
 INO 0.00026240 sec

===== CHANNEL f1 =====  
 NUC1 1H  
 P1 9.50 usec  
 PL1 -6.00 dB  
 SF01 400.1317018 MHz

F1 - Acquisition Parameters  
 ND0 1  
 TD 256  
 SFO1 400.1317 MHz  
 FIDRES 14.886623 Hz  
 SW 9.524 Ppm  
 FMODE QF

F2 - Processing parameters  
 SI 1024  
 SF 400.1300000 MHz  
 WDW SINE  
 SSB 0  
 LB 0.00 Hz  
 GB 0  
 PC 1.40  
 SR 0.00 Hz

F1 - Processing parameters  
 SI 1024  
 MC2 QF  
 SF 400.1300000 MHz  
 WDW SINE  
 SSB 0  
 LB 0.00 Hz  
 GB 0

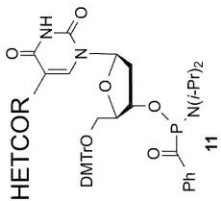

Current Data Parameters  
 NAME whh091814  
 EXPNO 6  
 PROCNO 1

F2 - Acquisition Parameters  
 Date\_ 20140919  
 Time 08:35  
 INSTRUM spect  
 PROBHD 5 mm QNP 1H/1  
 PULPROG hzgpcrf  
 SOLVENT h2o  
 NS 8  
 DS 4  
 SWH 18516.51 Hz  
 FWHZ 18516.51 Hz  
 FIDRES 0.1106420 sec  
 AC 16384  
 RG 27.000 usec  
 DW 27.000 usec  
 TE 293.2 K  
 CNST2 145.0000000  
 CNST11 3.0000000 sec  
 D1 2.0147190 sec  
 d2 0.00344828 sec  
 d3 0.00229885 sec  
 d4 0.00000000 sec  
 d5 0.00000000 sec  
 INO 0.00013120 sec

CHANNEL f1  
 NUC1 <sup>13</sup>C  
 P1 7.10 usec  
 P2 14.20 usec  
 PL1 -6.00 dB  
 SFO1 100.6215196 MHz

CHANNEL f2  
 CPDPRG2 waltz16  
 P1 9.90 usec  
 P2 100.00 usec  
 PL2 -6.00 dB  
 PL12 14.09 dB  
 SFO2 400.1317018 MHz

F1 - Acquisition parameters  
 NDO 1.2  
 SFO1 400.1317 MHz  
 FIDRES 29.773247 Hz  
 SW 9.524 ppm  
 FPMODE CP

F2 - Processing parameters  
 SI 2048  
 SF 100.6127558 MHz  
 W 65116  
 SSB 2  
 LB 0.00 Hz  
 GB 1.0  
 SC 0  
 SR -13.23 Hz

F1 - Processing parameters  
 SI 1024  
 SF 400.1300095 MHz  
 W 65116  
 SSB 2  
 LB 0.00 Hz  
 GB 1.0

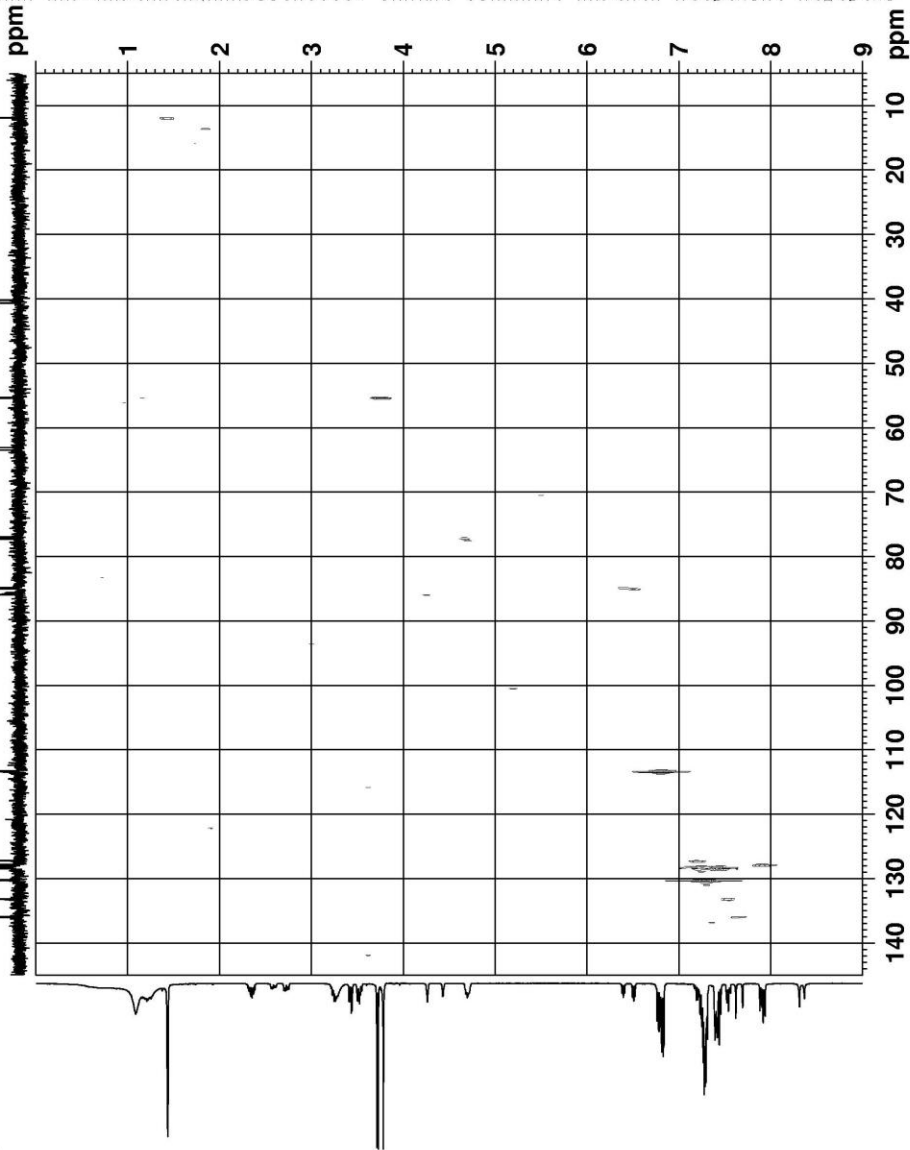

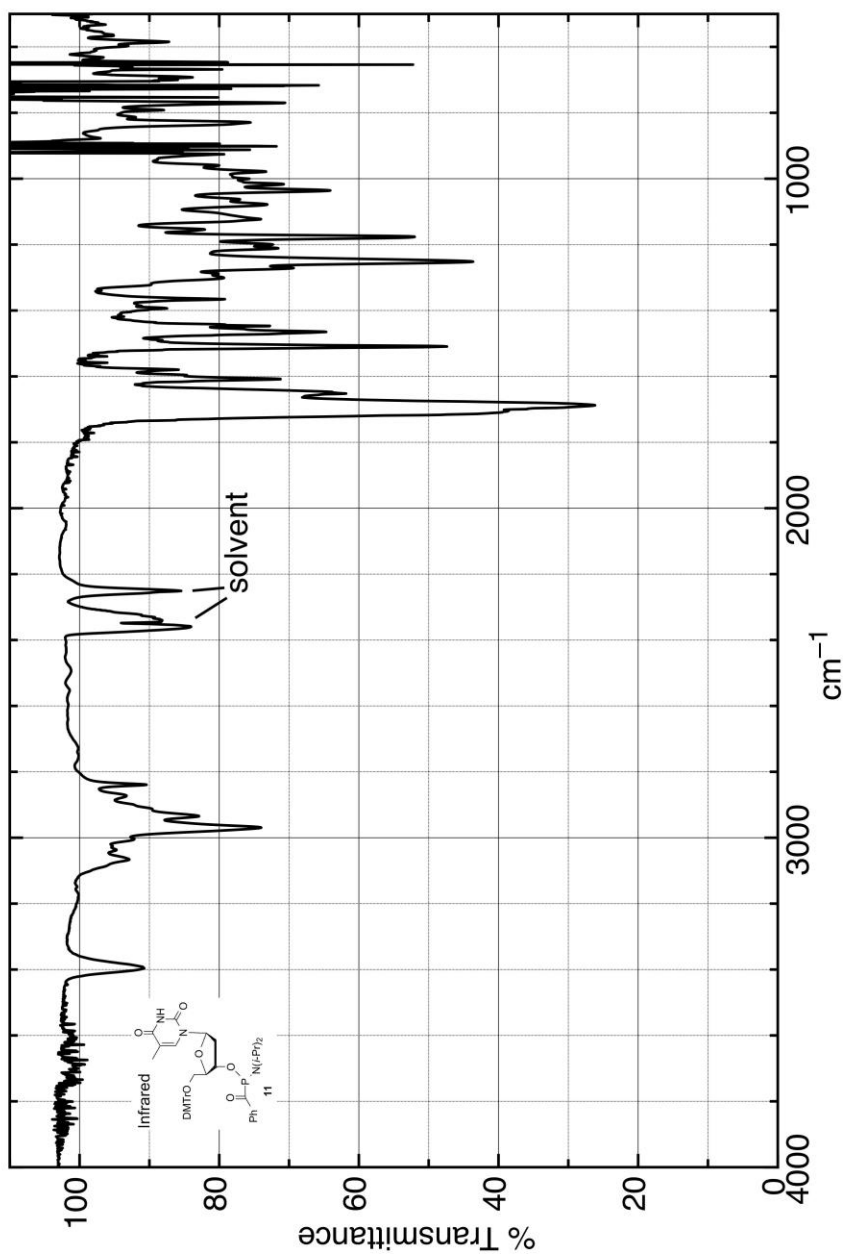

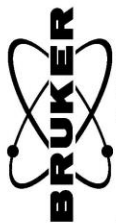

NAME whh101614  
 EXPNO 10  
 PROCNO 1  
 Date\_ 20141016  
 Time 11.53  
 INSTRUM spect  
 PROBHD 5 mm QXI 1H Z-  
 PULPROG zg30  
 TD 65536  
 SOLVENT CDC13  
 NS 16  
 DS 2  
 SWH 10330.572 Hz  
 SFO 101517632 Hz  
 FIDRES 3.1719923 sec  
 AQ 36  
 RG 36  
 DW 48.400 usec  
 DE 6.50 usec  
 TE 298.2 K  
 D1 1.00000000 sec  
 TDO 1  
 CHANNEL f1  
 NUC1 1H  
 P1 9.10 usec  
 PL1 3.00 dB  
 PL1W 15.10716526 W  
 SFO1 500.1330985 MHz  
 SF 500.1330985 MHz  
 MCHW 10  
 SSB 0  
 LB 0.30 Hz  
 GB 0  
 PC 1.00  
 SR 12.35 Hz

7.59  
7.58  
7.57  
7.56  
7.55  
7.54  
7.53  
7.52  
7.51  
7.50  
7.49  
7.48  
7.47  
7.46  
7.45  
7.44  
7.43  
7.42  
7.41  
7.40  
7.39  
7.38  
7.37  
7.36  
7.35  
7.34  
7.33  
7.32  
7.31  
7.30  
7.29  
7.28  
7.27  
7.26  
7.25  
7.24  
7.23  
7.22  
7.21  
7.20  
7.19  
7.18  
7.17  
7.16  
7.15  
7.14  
7.13  
7.12  
7.11  
7.10  
7.09  
7.08  
7.07  
7.06  
7.05  
7.04  
7.03  
7.02  
7.01  
7.00  
6.99  
6.98  
6.97  
6.96  
6.95  
6.94  
6.93  
6.92  
6.91  
6.90  
6.89  
6.88  
6.87  
6.86  
6.85  
6.84  
6.83  
6.82  
6.81  
6.80  
6.79  
6.78  
6.77  
6.76  
6.75  
6.74  
6.73  
6.72  
6.71  
6.70  
6.69  
6.68  
6.67  
6.66  
6.65  
6.64  
6.63  
6.62  
6.61  
6.60  
6.59  
6.58  
6.57  
6.56  
6.55  
6.54  
6.53  
6.52  
6.51  
6.50  
6.49  
6.48  
6.47  
6.46  
6.45  
6.44  
6.43  
6.42  
6.41  
6.40  
6.39  
6.38  
6.37  
6.36  
6.35  
6.34  
6.33  
6.32  
6.31  
6.30  
6.29  
6.28  
6.27  
6.26  
6.25  
6.24  
6.23  
6.22  
6.21  
6.20  
6.19  
6.18  
6.17  
6.16  
6.15  
6.14  
6.13  
6.12  
6.11  
6.10  
6.09  
6.08  
6.07  
6.06  
6.05  
6.04  
6.03  
6.02  
6.01  
6.00  
5.99  
5.98  
5.97  
5.96  
5.95  
5.94  
5.93  
5.92  
5.91  
5.90  
5.89  
5.88  
5.87  
5.86  
5.85  
5.84  
5.83  
5.82  
5.81  
5.80  
5.79  
5.78  
5.77  
5.76  
5.75  
5.74  
5.73  
5.72  
5.71  
5.70  
5.69  
5.68  
5.67  
5.66  
5.65  
5.64  
5.63  
5.62  
5.61  
5.60  
5.59  
5.58  
5.57  
5.56  
5.55  
5.54  
5.53  
5.52  
5.51  
5.50  
5.49  
5.48  
5.47  
5.46  
5.45  
5.44  
5.43  
5.42  
5.41  
5.40  
5.39  
5.38  
5.37  
5.36  
5.35  
5.34  
5.33  
5.32  
5.31  
5.30  
5.29  
5.28  
5.27  
5.26  
5.25  
5.24  
5.23  
5.22  
5.21  
5.20  
5.19  
5.18  
5.17  
5.16  
5.15  
5.14  
5.13  
5.12  
5.11  
5.10  
5.09  
5.08  
5.07  
5.06  
5.05  
5.04  
5.03  
5.02  
5.01  
5.00  
4.99  
4.98  
4.97  
4.96  
4.95  
4.94  
4.93  
4.92  
4.91  
4.90  
4.89  
4.88  
4.87  
4.86  
4.85  
4.84  
4.83  
4.82  
4.81  
4.80  
4.79  
4.78  
4.77  
4.76  
4.75  
4.74  
4.73  
4.72  
4.71  
4.70  
4.69  
4.68  
4.67  
4.66  
4.65  
4.64  
4.63  
4.62  
4.61  
4.60  
4.59  
4.58  
4.57  
4.56  
4.55  
4.54  
4.53  
4.52  
4.51  
4.50  
4.49  
4.48  
4.47  
4.46  
4.45  
4.44  
4.43  
4.42  
4.41  
4.40  
4.39  
4.38  
4.37  
4.36  
4.35  
4.34  
4.33  
4.32  
4.31  
4.30  
4.29  
4.28  
4.27  
4.26  
4.25  
4.24  
4.23  
4.22  
4.21  
4.20  
4.19  
4.18  
4.17  
4.16  
4.15  
4.14  
4.13  
4.12  
4.11  
4.10  
4.09  
4.08  
4.07  
4.06  
4.05  
4.04  
4.03  
4.02  
4.01  
4.00  
3.99  
3.98  
3.97  
3.96  
3.95  
3.94  
3.93  
3.92  
3.91  
3.90  
3.89  
3.88  
3.87  
3.86  
3.85  
3.84  
3.83  
3.82  
3.81  
3.80  
3.79  
3.78  
3.77  
3.76  
3.75  
3.74  
3.73  
3.72  
3.71  
3.70  
3.69  
3.68  
3.67  
3.66  
3.65  
3.64  
3.63  
3.62  
3.61  
3.60  
3.59  
3.58  
3.57  
3.56  
3.55  
3.54  
3.53  
3.52  
3.51  
3.50  
3.49  
3.48  
3.47  
3.46  
3.45  
3.44  
3.43  
3.42  
3.41  
3.40  
3.39  
3.38  
3.37  
3.36  
3.35  
3.34  
3.33  
3.32  
3.31  
3.30  
3.29  
3.28  
3.27  
3.26  
3.25  
3.24  
3.23  
3.22  
3.21  
3.20  
3.19  
3.18  
3.17  
3.16  
3.15  
3.14  
3.13  
3.12  
3.11  
3.10  
3.09  
3.08  
3.07  
3.06  
3.05  
3.04  
3.03  
3.02  
3.01  
3.00  
2.99  
2.98  
2.97  
2.96  
2.95  
2.94  
2.93  
2.92  
2.91  
2.90  
2.89  
2.88  
2.87  
2.86  
2.85  
2.84  
2.83  
2.82  
2.81  
2.80  
2.79  
2.78  
2.77  
2.76  
2.75  
2.74  
2.73  
2.72  
2.71  
2.70  
2.69  
2.68  
2.67  
2.66  
2.65  
2.64  
2.63  
2.62  
2.61  
2.60  
2.59  
2.58  
2.57  
2.56  
2.55  
2.54  
2.53  
2.52  
2.51  
2.50  
2.49  
2.48  
2.47  
2.46  
2.45  
2.44  
2.43  
2.42  
2.41  
2.40  
2.39  
2.38  
2.37  
2.36  
2.35  
2.34  
2.33  
2.32  
2.31  
2.30  
2.29  
2.28  
2.27  
2.26  
2.25  
2.24  
2.23  
2.22  
2.21  
2.20  
2.19  
2.18  
2.17  
2.16  
2.15  
2.14  
2.13  
2.12  
2.11  
2.10  
2.09  
2.08  
2.07  
2.06  
2.05  
2.04  
2.03  
2.02  
2.01  
2.00  
1.99  
1.98  
1.97  
1.96  
1.95  
1.94  
1.93  
1.92  
1.91  
1.90  
1.89  
1.88  
1.87  
1.86  
1.85  
1.84  
1.83  
1.82  
1.81  
1.80  
1.79  
1.78  
1.77  
1.76  
1.75  
1.74  
1.73  
1.72  
1.71  
1.70  
1.69  
1.68  
1.67  
1.66  
1.65  
1.64  
1.63  
1.62  
1.61  
1.60  
1.59  
1.58  
1.57  
1.56  
1.55  
1.54  
1.53  
1.52  
1.51  
1.50  
1.49  
1.48  
1.47  
1.46  
1.45  
1.44  
1.43  
1.42  
1.41  
1.40  
1.39  
1.38  
1.37  
1.36  
1.35  
1.34  
1.33  
1.32  
1.31  
1.30  
1.29  
1.28  
1.27  
1.26  
1.25  
1.24  
1.23  
1.22  
1.21  
1.20  
1.19  
1.18  
1.17  
1.16  
1.15  
1.14  
1.13  
1.12  
1.11  
1.10  
1.09  
1.08  
1.07  
1.06  
1.05  
1.04  
1.03  
1.02  
1.01  
1.00  
0.99  
0.98  
0.97  
0.96  
0.95  
0.94  
0.93  
0.92  
0.91  
0.90  
0.89  
0.88  
0.87  
0.86  
0.85  
0.84  
0.83  
0.82  
0.81  
0.80  
0.79  
0.78  
0.77  
0.76  
0.75  
0.74  
0.73  
0.72  
0.71  
0.70  
0.69  
0.68  
0.67  
0.66  
0.65  
0.64  
0.63  
0.62  
0.61  
0.60  
0.59  
0.58  
0.57  
0.56  
0.55  
0.54  
0.53  
0.52  
0.51  
0.50  
0.49  
0.48  
0.47  
0.46  
0.45  
0.44  
0.43  
0.42  
0.41  
0.40  
0.39  
0.38  
0.37  
0.36  
0.35  
0.34  
0.33  
0.32  
0.31  
0.30  
0.29  
0.28  
0.27  
0.26  
0.25  
0.24  
0.23  
0.22  
0.21  
0.20  
0.19  
0.18  
0.17  
0.16  
0.15  
0.14  
0.13  
0.12  
0.11  
0.10  
0.09  
0.08  
0.07  
0.06  
0.05  
0.04  
0.03  
0.02  
0.01  
0.00  
-0.01  
-0.02  
-0.03  
-0.04

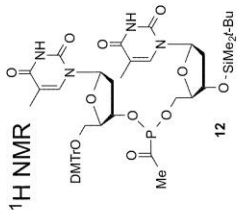

HO  
 Th  
 O-SiMe<sub>2</sub>-t-Bu  
 impurity peaks  
 marked by \*

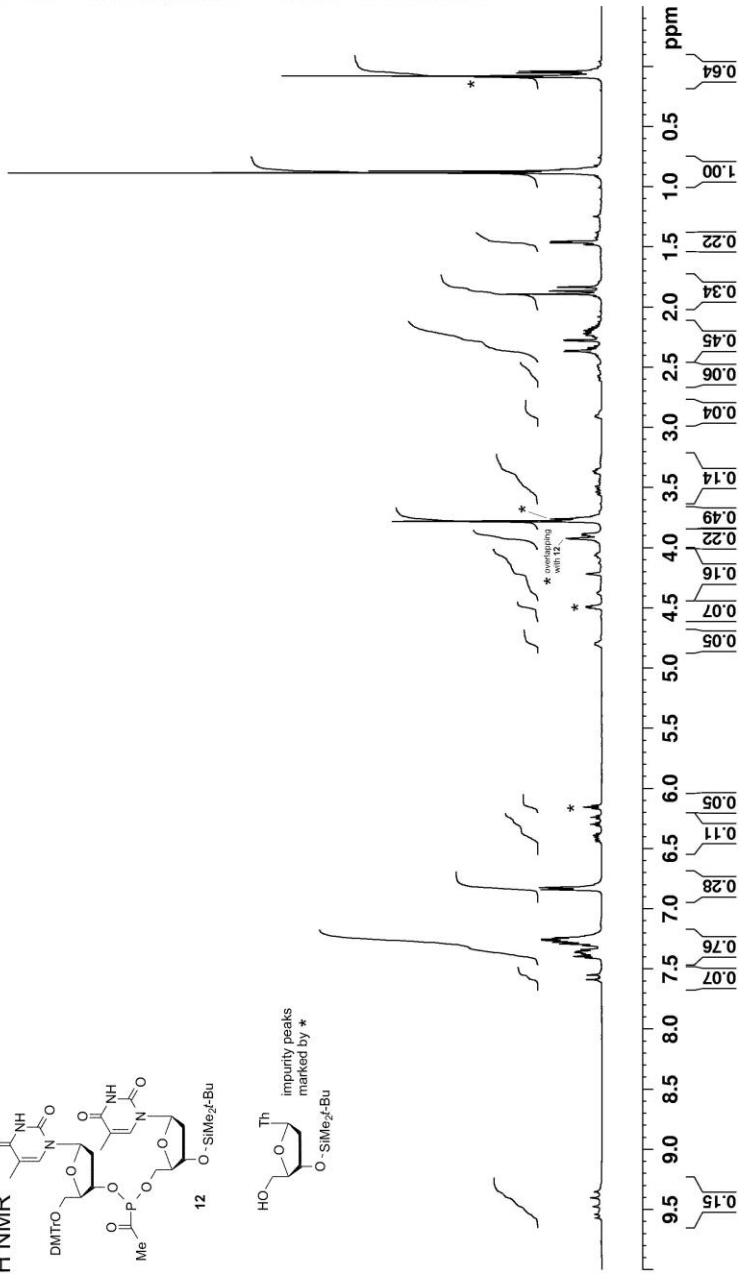



```

NAME      whh101614
EXPNO     13
PROCNO    1
Date_     20141016
Time      16.24
INSTRUM   spect
PROBHD    5 mm QXI 1H Z-
PULPROG   zgpg30
TD         65536
SOLVENT   CDCl3
NS         4096
DS         4
SWH        35714.285 Hz
FIDRES     0.544957 Hz
AQ         0.9175540 sec
RG         322
RW         14.000 usec
TE         299.2 K
DE         88.2
D1         2.00000000 sec
D11        0.03000000 sec
TD0        1

===== CHANNEL f1 =====
NUC1       13C
P1         15.50 usec
PL1        -1.00 dB
PL1W       132.81565857 W
SFO1       125.7716224 MHz

===== CHANNEL f2 =====
CPDPRG2    waltz16
NUC2       1H
PCPD2      80.00 usec
PL2         3.00 dB
PL2W       21.88 dB
PL3         120.00 dB
PL3W       15.107119526 W
PL4         0.19551556 W
PL4W       0.00000000 W
SFO2       500.1320005 MHz
SI         32768
SF         125.7577767 MHz
WDW        EM
SSB         0
LB         1.00 Hz
GB         0
PC         1.40
SR         -12.34 Hz
  
```

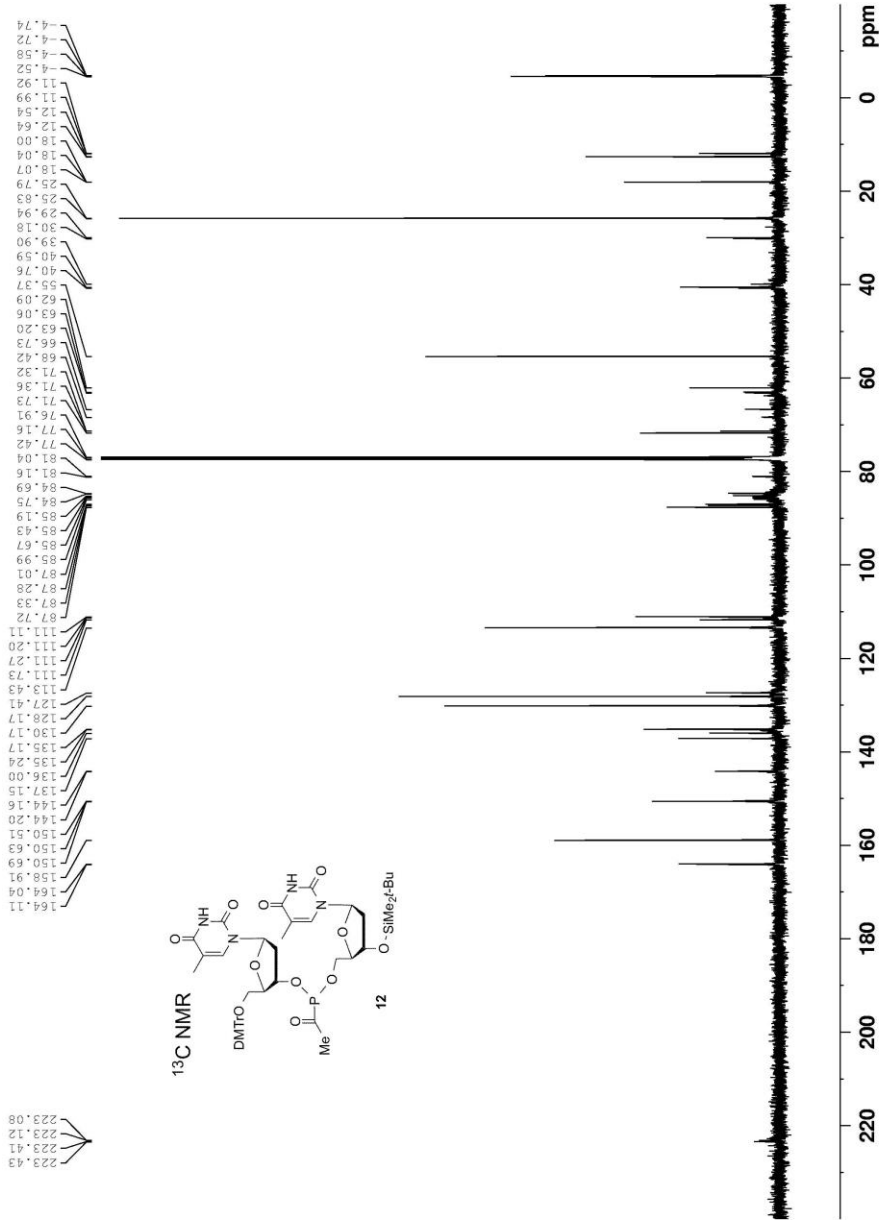



```

NAME      whh101614
EXPNO     15
PROCNO    1
Date_     20141016
Time      18.07
INSTRUM   spect
PROBHD    5 mm QXI 1H Z-
PULPROG   zgpg30
TD         65536
SOLVENT   CDCl3
NS         128
DS         4
SWH        81521.742 Hz
FIDRES     1.243923 Hz
AQ         0.4020041 sec
RG         2050
RW         6.133 usec
DE         6.133 usec
TE         298.2 K
D1         2.00000000 sec
D1.1      0.03000000 sec
TD0        1

===== CHANNEL f1 =====
NUC1       31P
P1         38.75 usec
PL1        0.00 dB
PL1W       90.17671967 W
SFO1       202.4765806 MHz

===== CHANNEL f2 =====
CPDPRG2    waltz16
NUC2       1H
PCPD2      80.00 usec
PL2         3.00 dB
PL12        2.88 dB
PL13        120.00 dB
PL2W        15.10710526 W
PL12W       0.19551556 W
PL13W       0.00000000 W
SFO2        500.1320005 MHz
SI          32768
SF          202.4563071 MHz
WDW         EM
SSB         0
LB          4.00 Hz
GB          0
PC          1.40
SR          -27.94 Hz
  
```

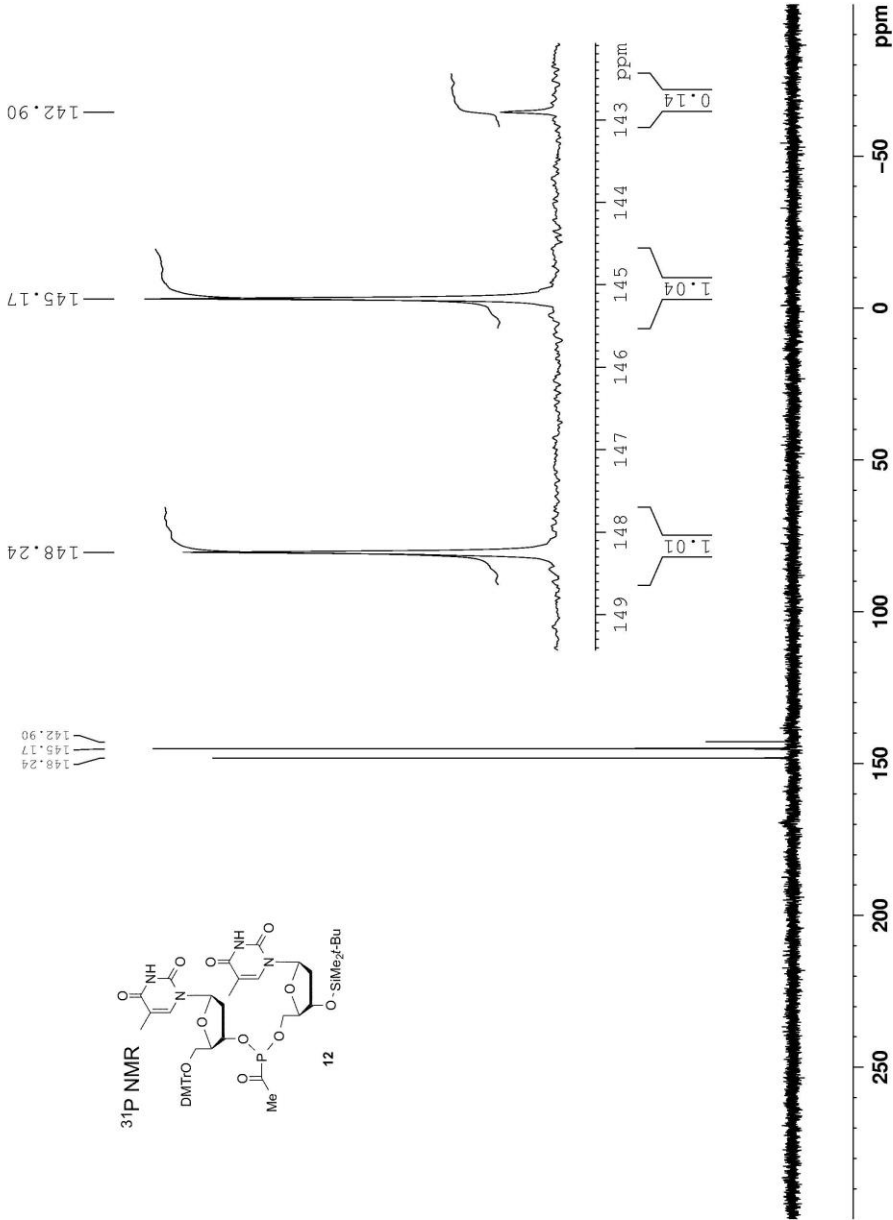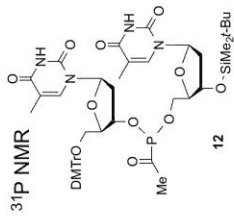

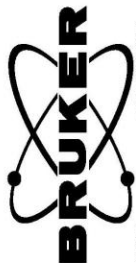

NAME whh101614  
 EXPNO 1  
 PROCNO 14  
 Date\_ 20141016  
 Time 16.35  
 INSTRUM spect  
 PROBHD 5 mm QXI 1H Z-  
 PULPROG cosygaf90  
 TD 2048  
 SOLVENT CDCl3  
 NS 8  
 DS 4  
 SWH 5154.639 Hz  
 FIDRES 2.516914 Hz  
 AQ 0.1987060 sec  
 RG 28.5  
 DW 97.000 usec  
 DE 6.50 usec  
 TE 298.2 K  
 D0 0.00000300 sec  
 D1 2.00000000 sec  
 IN0 0.00019395 sec  
 ===== CHANNEL f1 =====  
 NUC1 1H  
 P1 9.10 usec  
 PL1 3.00 dB  
 PL1W 15.10710526 W  
 SFO1 500.1323164 MHz  
 NDO 1  
 TD 256  
 SFO1 500.1323 MHz  
 FIDRES 20.142307 Hz  
 SW 10.310 ppm  
 FmMODE QF  
 SI 1024  
 SF 500.1300124 MHz  
 SINE SINE  
 SSB 0  
 LB 0.00 Hz  
 GB 0  
 PC 1.40  
 SR 12.35 Hz  
 SI 1024  
 MC2 QF  
 SF 500.1300124 MHz  
 SINE SINE  
 SSB 0  
 LB 0.00 Hz  
 GB 0

COSY90

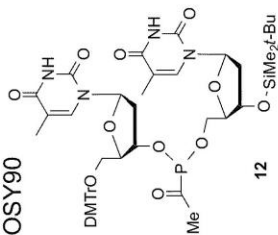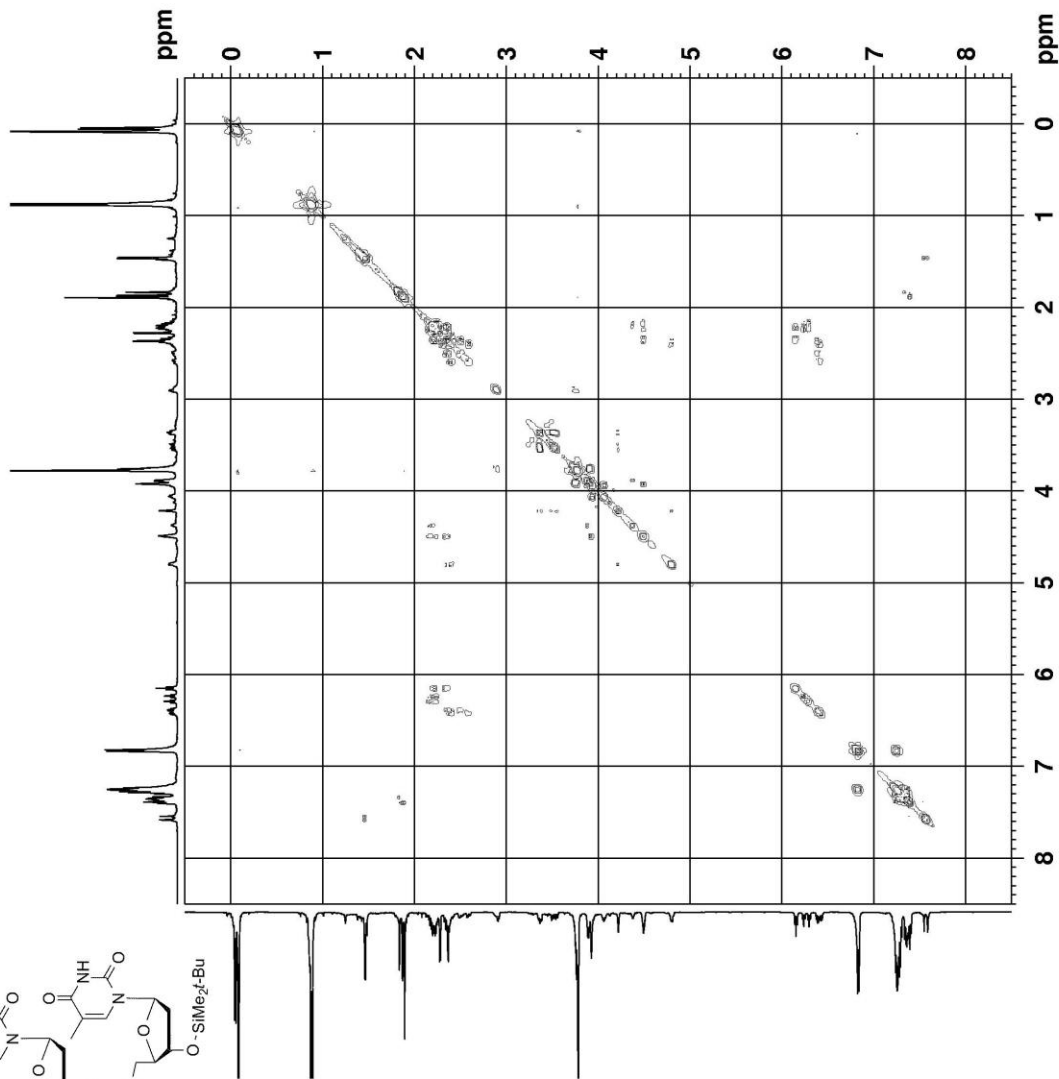



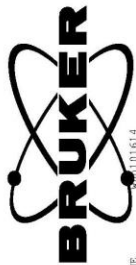

```

NAME          12
EXPNO         12
PROCNO        1
Date_         20110116
Time          12:36
INSTRUM       spect
PROBHD        5 mm QXI 1H 2
PULPROG       hsqcetps12
TD            65536
SOLVENT       CDCl3
NS            2
DS            2
SFO1          6666.665 Hz
SFO2          651041.7 Hz
FIDRES       0.0768500 sec
AQ           0.0768500 sec
RG           75.000 usec
DE           6.50 usec
CBST2        145.0000000 K
D0           0.00000300 sec
D1           1.500000000 sec
D2           0.030000000 sec
D3           0.000004000 sec
D4           0.000000000 sec
IN0           0.00002400 sec
ZDELTA       0.00002400 sec

===== CHANNEL f1 =====
NUC1          1H
P2           18.20 usec
F2           1000.00 usec
SFO1         500.1330659 MHz
SFO2         15.10710526 MHz

===== CHANNEL f2 =====
CPDPRG2      ghrp
NUC2          13C
P2           15.13C usec
F2           31.00 usec
SFO1         125.7672177 MHz
SFO2         132.415654577 MHz

===== GRADIENT CHANNEL =====
GENM02       SINE-100
GENM03       SINE-100
GENM04       SINE-100
GENM05       SINE-100
GZ22         20.10 %
GZ23         11.00 %
GZ24         11.00 %
P19          1000.00 usec
P16          600.00 usec
TD           256
SFO1         125.7672 MHz
FIDRES       81.380234 Hz
PROBHD       Echo-MTEcho
P1          500.1330659 MHz
PC           2
SSB          0.00 Hz
LB           1.40
PC           12.35 Hz
SR           12.35 Hz
MC2          echo-MTEcho
SF           125.7577767 MHz
SFO2         125.7577767 MHz
SFO1         125.7577767 MHz
LB           0.00 Hz
GB           0
  
```

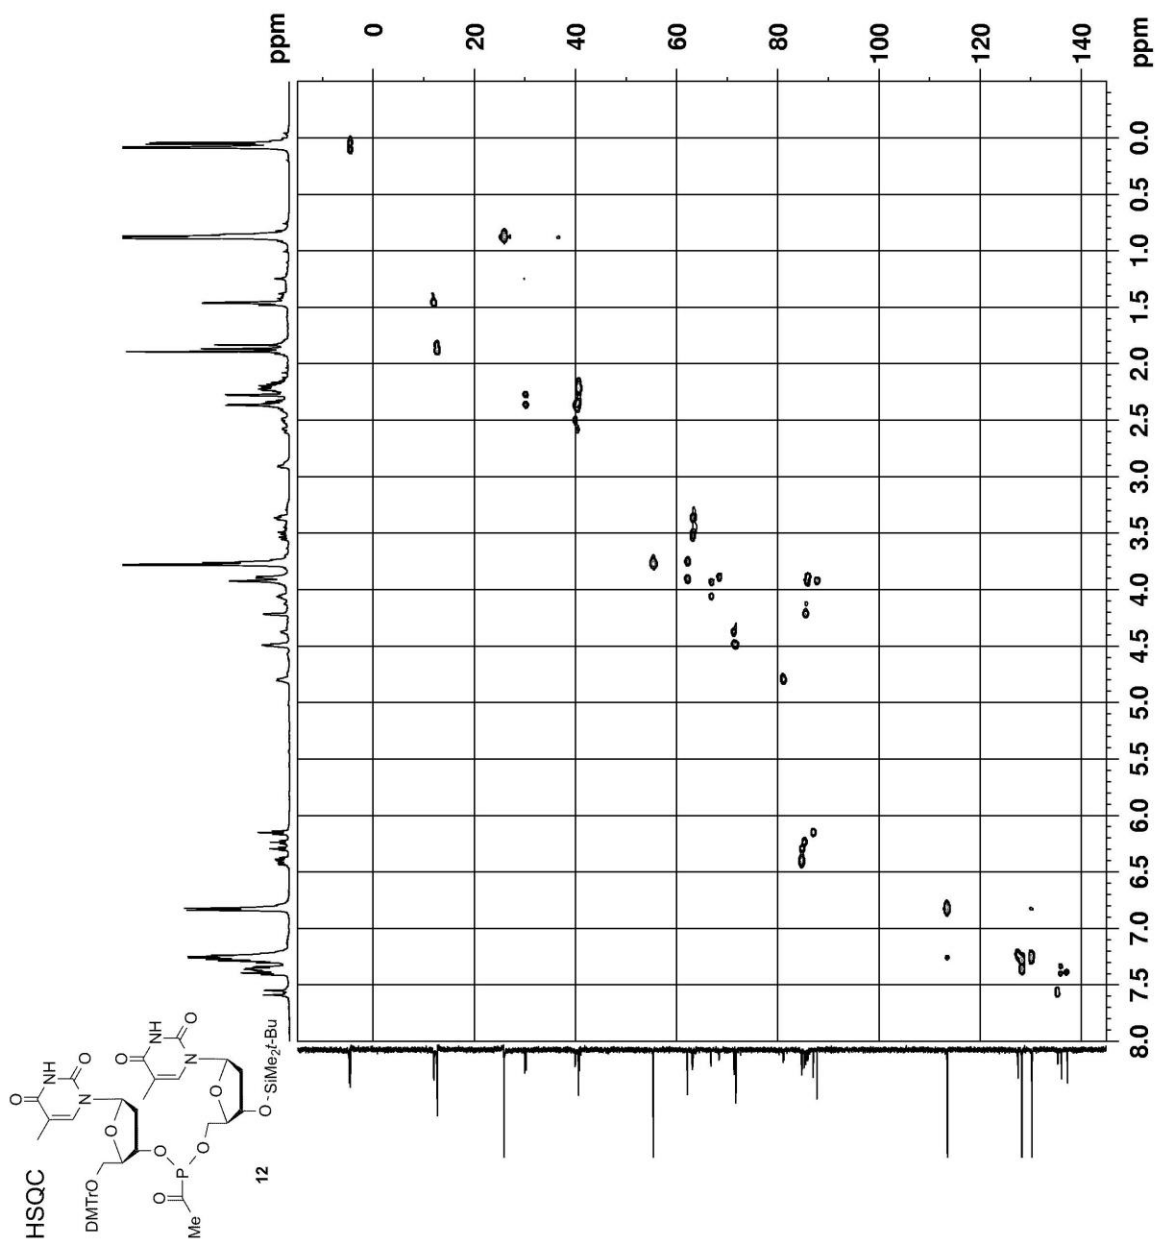

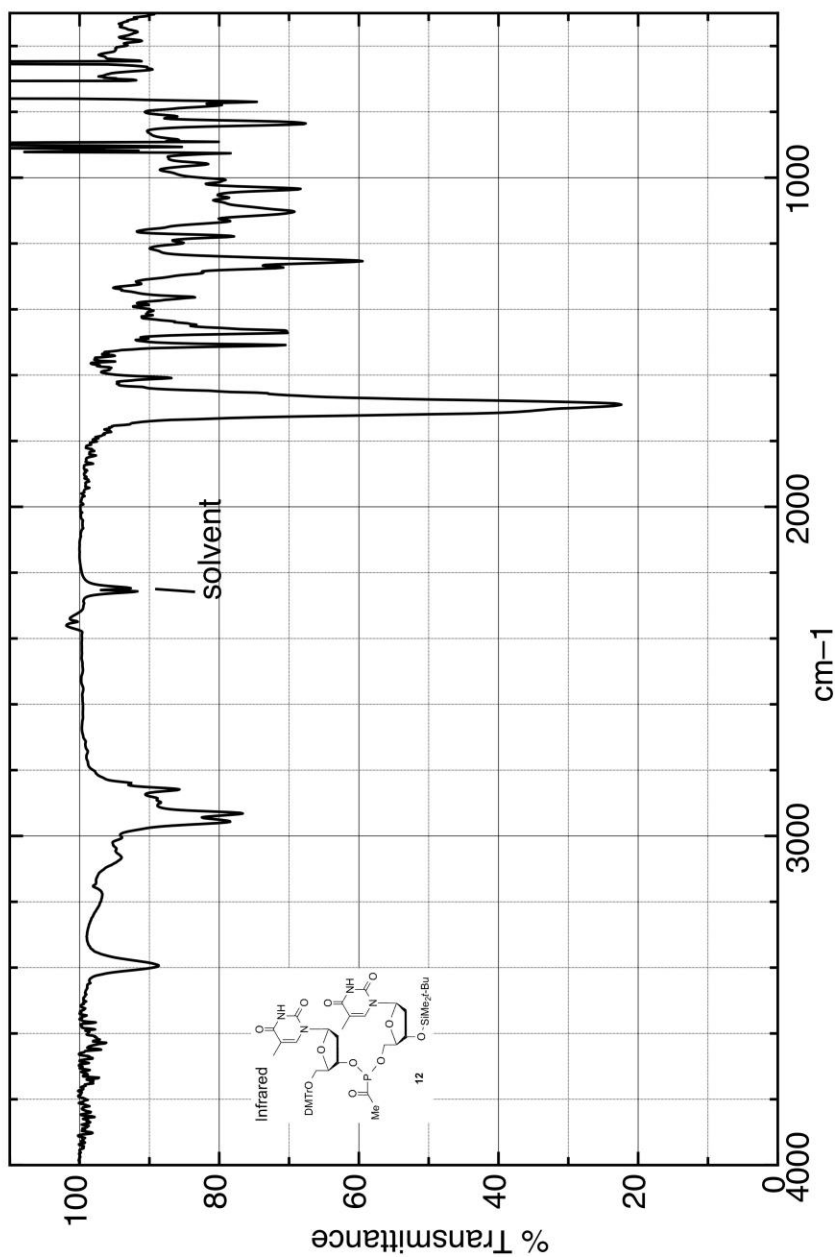

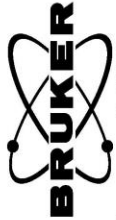

NAME whh102514  
 EXPNO 10  
 PROCNO 1  
 Date\_ 20141025  
 Time 10.45  
 INSTRUM spect  
 PROBHD 5 mm QXI 1H Z-  
 PULPROG zg30  
 TD 65536  
 SOLVENT CDCl3  
 NS 16  
 DS 2  
 SWH 10330.572 Hz  
 SFO1 500.1360189 MHz  
 FIDRES 0.151632 Hz  
 AQ 3.1719923 sec  
 RG 64  
 DW 48.400 usec  
 DE 6.50 usec  
 TE 298.2 K  
 D1 1.00000000 sec  
 TDO 1  
 CHANNEL f1  
 NUC1 1H  
 P1 9.10 usec  
 PL1 3.00 dB  
 PL1W 15.10716526 W  
 SFO1 500.1360189 MHz  
 SI 32728  
 SF 500.1360189 MHz  
 MCHW 0  
 SSB 0  
 LB 0.30 Hz  
 GB 0  
 PC 1.00  
 SR 12.60 Hz

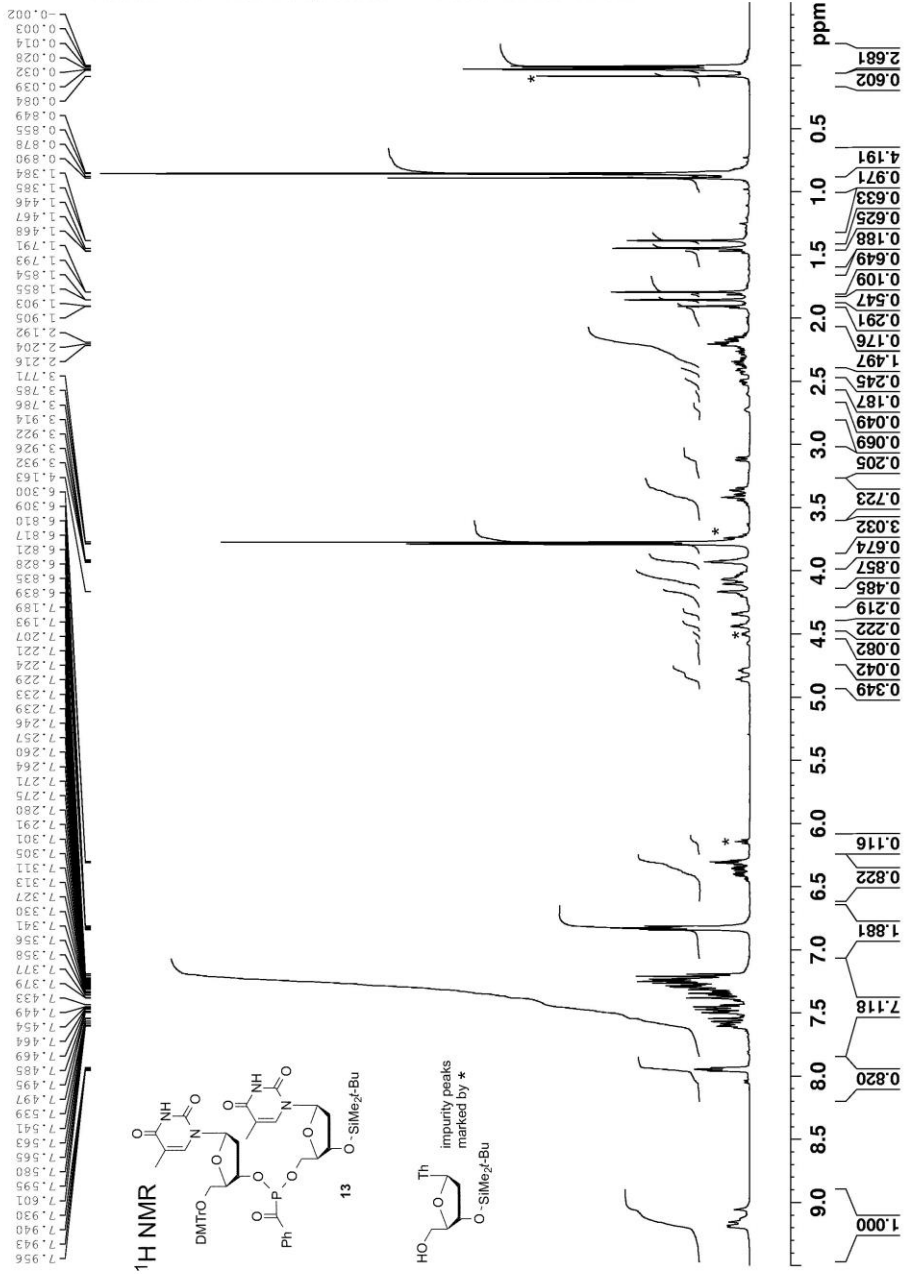



```

NAME      whh102514
EXPNO     13
PROCNO    1
Date_     20141025
Time      15.14
INSTRUM   spect
PROBHD    5 mm QXI 1H Z-
PULPROG   zgpg30
TD         65536
SOLVENT   CDCl3
NS         4096
DS         4
SWH        31250.000 Hz
FIDRES     0.476837 Hz
AQ         1.0486259 sec
RG         324
WDW        16.000 usec
SSB        0.000 usec
LB         28.2 Ksec
DE         2.00000000 sec
TE         0.03000000 sec
D1         2.00000000 sec
D11        0.03000000 sec
TD0        1

=====
CHANNEL f1
=====
NUC1       13C
P1         15.50 usec
PL1        -1.00 dB
PL1W       132.81565857 W
SFO1       125.7716224 MHz

=====
CHANNEL f2
=====
CPDPRG2    waltz16
NUC2       1H
PCPD2      80.00 usec
PL2         3.00 dB
PL2W       21.88 dB
PL3         120.00 dB
PL3W       15.10710526 W
PL2W       0.19551556 W
PL13W      0.00000000 W
SFO2       500.1320005 MHz
SI         32768
SF         125.7577747 MHz
WDW        EM
SSB        0
LB         1.00 Hz
GB         0
PC         1.40
SR         -1.431 Hz
  
```

211.76  
 211.41  
 210.93  
 163.92  
 158.91  
 150.57  
 144.22  
 137.41  
 136.94  
 136.27  
 135.92  
 135.45  
 135.32  
 135.22  
 135.18  
 134.49  
 134.41  
 130.20  
 130.13  
 129.19  
 129.16  
 128.44  
 128.37  
 128.31  
 128.20  
 128.13  
 127.38  
 113.47  
 113.42  
 113.41  
 111.67  
 111.62  
 111.39  
 111.20  
 111.16  
 87.26  
 87.06  
 86.15  
 85.76  
 85.54  
 85.42  
 84.42  
 84.94  
 84.73  
 84.64  
 77.41  
 77.16  
 76.90  
 71.77  
 68.64  
 68.54  
 66.95  
 66.29  
 63.17  
 62.17  
 55.39  
 55.37  
 40.67  
 40.58  
 39.94  
 25.85  
 25.81  
 60.11  
 18.03  
 12.60  
 12.56  
 11.94  
 11.80  
 4.52  
 4.57  
 4.74  
 4.94  
 4.97  
 4.94

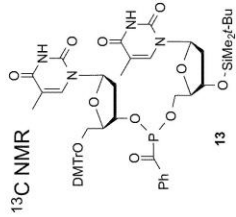

ppm



```

NAME      whh102514
EXPNO     11
PROCNO    1
Date_     20141025
Time      11:00
INSTRUM   spect
PROBHD    5 mm QXI 1H Z-
PULPROG   zgpg30
TD         65536
SOLVENT   CDCl3
NS         256
DS         4
SWH        81521.742 Hz
FIDRES     1.243923 Hz
AQ         0.4020041 sec
RG         2050
RW         6.153 usec
DE         28.2 Ksec
TE         298.2 K
D1         2.00000000 sec
D11        0.03000000 sec
TD0        1

===== CHANNEL f1 =====
NUC1       31P
P1         38.75 usec
PL1        0.00 dB
PL1W       90.17671967 W
SFO1       202.4765806 MHz

===== CHANNEL f2 =====
CPDPRG2    waltz16
NUC2       1H
P2         80.00 usec
PL2        3.00 dB
PL2W       1.98 dB
PL3        120.00 dB
PL3W       15.107119526 W
PL4        0.19551556 W
PL5        0.00000000 W
SFO2       500.1320005 MHz
SI         32768
SF         202.4563071 MHz
WDW        EM
SSB        0
LB         4.00 Hz
GB         0
PC         1.40
SR         -27.94 Hz
  
```

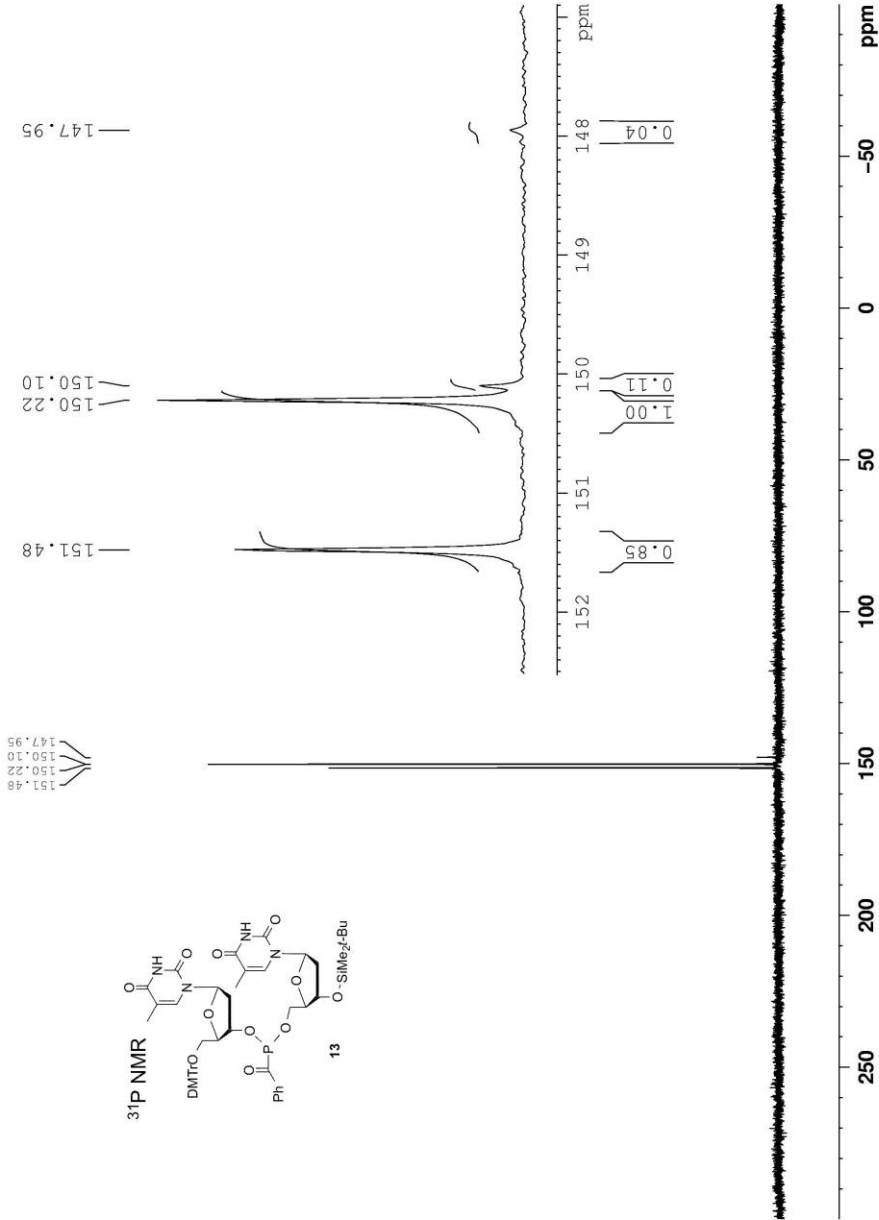

COSY90

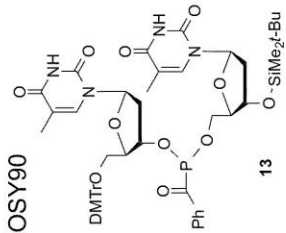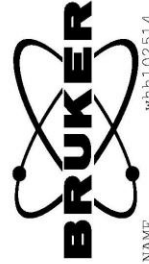

NAME whh102514  
 EXPNO 1  
 PROCNO 14  
 Date\_ 20141025  
 Time 15.23  
 INSTRUM spect  
 PROBHD 5 mm QXI 1H Z-  
 PULPROG cosygaf90  
 TD 2048  
 SOLVENT CDCl<sub>3</sub>  
 NS 8  
 DS 4  
 SWH 5154.639 Hz  
 FIDRES 2.516914 Hz  
 AQ 0.1987060 sec  
 RG 57  
 DW 97.000 usec  
 DE 6.50 usec  
 TE 298.2 K  
 D0 0.00000300 sec  
 D1 2.00000000 sec  
 IN0 0.00019395 sec

===== CHANNEL f1 =====  
 NUC1 1H  
 P1 9.10 usec  
 PL1 3.00 dB  
 PL1W 15.10710526 W  
 SFO1 500.1323164 MHz  
 NDO 1  
 TD 256  
 SFO1 500.1323 MHz  
 FIDRES 20.142307 Hz  
 SW 10.310 ppm  
 FmMODE QF  
 SI 1024  
 SF 500.1300126 MHz  
 SINE  
 WDW 0  
 LB 0.00 Hz  
 GB 0  
 PC 1.00  
 SR 12.60 Hz  
 SI 1024  
 MC2 QF  
 SF 500.1300126 MHz  
 SINE  
 WDW 0  
 LB 0.00 Hz  
 GB 0

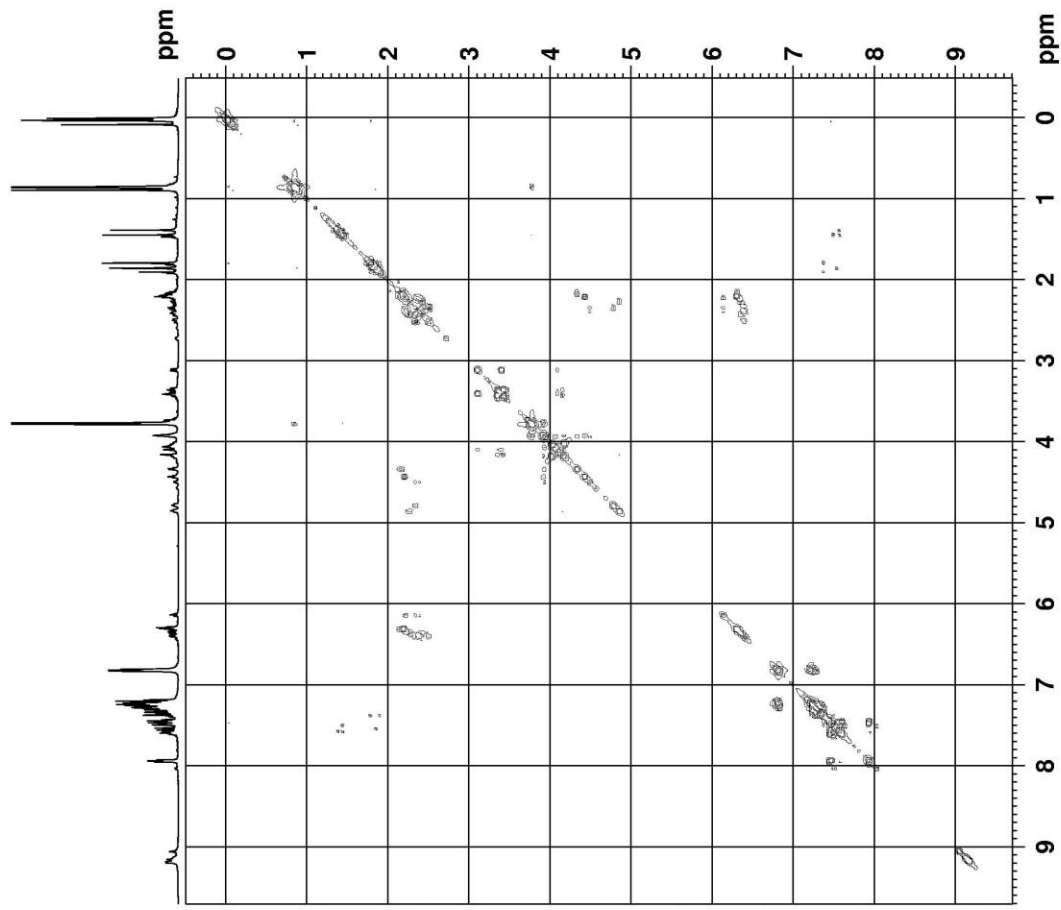

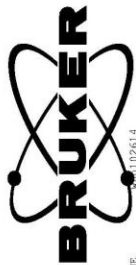

```

NAME: 13
EXPNO: 1
PROCNO: 1
Date_: 2011.02.26
Time: 9.53
INSTRUM: spect
PROBHD: 5 mm QXI 1H 2
PULPROG: hsqcetpsp12
TD: 65536
SOLVENT: CDCl3
NS: 2
DS: 2
SWH: 6666.665 Hz
FIDRES: 6.510417 Hz
AQ: 0.0768500 sec
RG: 327.5
DM: 75.000 usec
DE: 6.50 usec
TE: 300.2 K
CBST2: 135.0000000 K
D0: 0.0000000 sec
D1: 1.5000000 sec
D11: 0.0300000 sec
D12: 0.0300000 sec
D13: 0.0000000 sec
D14: 0.0000000 sec
D24: 0.0006207 sec
IN0: 0.0000240 sec
ZDELTA: 0.0000000 sec

===== CHANNEL f1 =====
NUC1: 13
P1: 18.00 usec
PCPD1: 18.20 usec
P2: 1000.00 usec
PCPD2: 1000.00 usec
P3: 12.00 usec
PCPD3: 12.00 usec
PL12W: 15.10710528 MHz
SFO1: 500.1330669 MHz

===== CHANNEL f2 =====
CPDPRG2: garp
NUC2: 13
P4: 15.13 usec
PCPD4: 15.13 usec
P5: 31.00 usec
PCPD5: 31.00 usec
P6: 70.00 usec
PCPD6: 70.00 usec
P7: 12.00 usec
PCPD7: 12.00 usec
PL12W: 132.81565457 MHz
SFO2: 500.1330669 MHz

===== GRADIENT CHANNEL =====
G1: 100
GENM1: SINE-100
G2: 100
GENM2: SINE-100
G3: 100
GENM3: SINE-100
G4: 100
GENM4: SINE-100
G5: 100
GENM5: SINE-100
G6: 100
GENM6: SINE-100
G7: 100
GENM7: SINE-100
G8: 100
GENM8: SINE-100
G9: 100
GENM9: SINE-100
G10: 100
GENM10: SINE-100
G11: 100
GENM11: SINE-100
G12: 100
GENM12: SINE-100
G13: 100
GENM13: SINE-100
G14: 100
GENM14: SINE-100
G15: 100
GENM15: SINE-100
G16: 100
GENM16: SINE-100
G17: 100
GENM17: SINE-100
G18: 100
GENM18: SINE-100
G19: 100
GENM19: SINE-100
G20: 100
GENM20: SINE-100
G21: 100
GENM21: SINE-100
G22: 100
GENM22: SINE-100
G23: 100
GENM23: SINE-100
G24: 100
GENM24: SINE-100
G25: 100
GENM25: SINE-100
G26: 100
GENM26: SINE-100
G27: 100
GENM27: SINE-100
G28: 100
GENM28: SINE-100
G29: 100
GENM29: SINE-100
G30: 100
GENM30: SINE-100
G31: 100
GENM31: SINE-100
G32: 100
GENM32: SINE-100
G33: 100
GENM33: SINE-100
G34: 100
GENM34: SINE-100
G35: 100
GENM35: SINE-100
G36: 100
GENM36: SINE-100
G37: 100
GENM37: SINE-100
G38: 100
GENM38: SINE-100
G39: 100
GENM39: SINE-100
G40: 100
GENM40: SINE-100
G41: 100
GENM41: SINE-100
G42: 100
GENM42: SINE-100
G43: 100
GENM43: SINE-100
G44: 100
GENM44: SINE-100
G45: 100
GENM45: SINE-100
G46: 100
GENM46: SINE-100
G47: 100
GENM47: SINE-100
G48: 100
GENM48: SINE-100
G49: 100
GENM49: SINE-100
G50: 100
GENM50: SINE-100
G51: 100
GENM51: SINE-100
G52: 100
GENM52: SINE-100
G53: 100
GENM53: SINE-100
G54: 100
GENM54: SINE-100
G55: 100
GENM55: SINE-100
G56: 100
GENM56: SINE-100
G57: 100
GENM57: SINE-100
G58: 100
GENM58: SINE-100
G59: 100
GENM59: SINE-100
G60: 100
GENM60: SINE-100
G61: 100
GENM61: SINE-100
G62: 100
GENM62: SINE-100
G63: 100
GENM63: SINE-100
G64: 100
GENM64: SINE-100
G65: 100
GENM65: SINE-100
G66: 100
GENM66: SINE-100
G67: 100
GENM67: SINE-100
G68: 100
GENM68: SINE-100
G69: 100
GENM69: SINE-100
G70: 100
GENM70: SINE-100
G71: 100
GENM71: SINE-100
G72: 100
GENM72: SINE-100
G73: 100
GENM73: SINE-100
G74: 100
GENM74: SINE-100
G75: 100
GENM75: SINE-100
G76: 100
GENM76: SINE-100
G77: 100
GENM77: SINE-100
G78: 100
GENM78: SINE-100
G79: 100
GENM79: SINE-100
G80: 100
GENM80: SINE-100
G81: 100
GENM81: SINE-100
G82: 100
GENM82: SINE-100
G83: 100
GENM83: SINE-100
G84: 100
GENM84: SINE-100
G85: 100
GENM85: SINE-100
G86: 100
GENM86: SINE-100
G87: 100
GENM87: SINE-100
G88: 100
GENM88: SINE-100
G89: 100
GENM89: SINE-100
G90: 100
GENM90: SINE-100
G91: 100
GENM91: SINE-100
G92: 100
GENM92: SINE-100
G93: 100
GENM93: SINE-100
G94: 100
GENM94: SINE-100
G95: 100
GENM95: SINE-100
G96: 100
GENM96: SINE-100
G97: 100
GENM97: SINE-100
G98: 100
GENM98: SINE-100
G99: 100
GENM99: SINE-100
G100: 100
GENM100: SINE-100

```

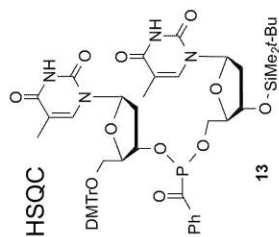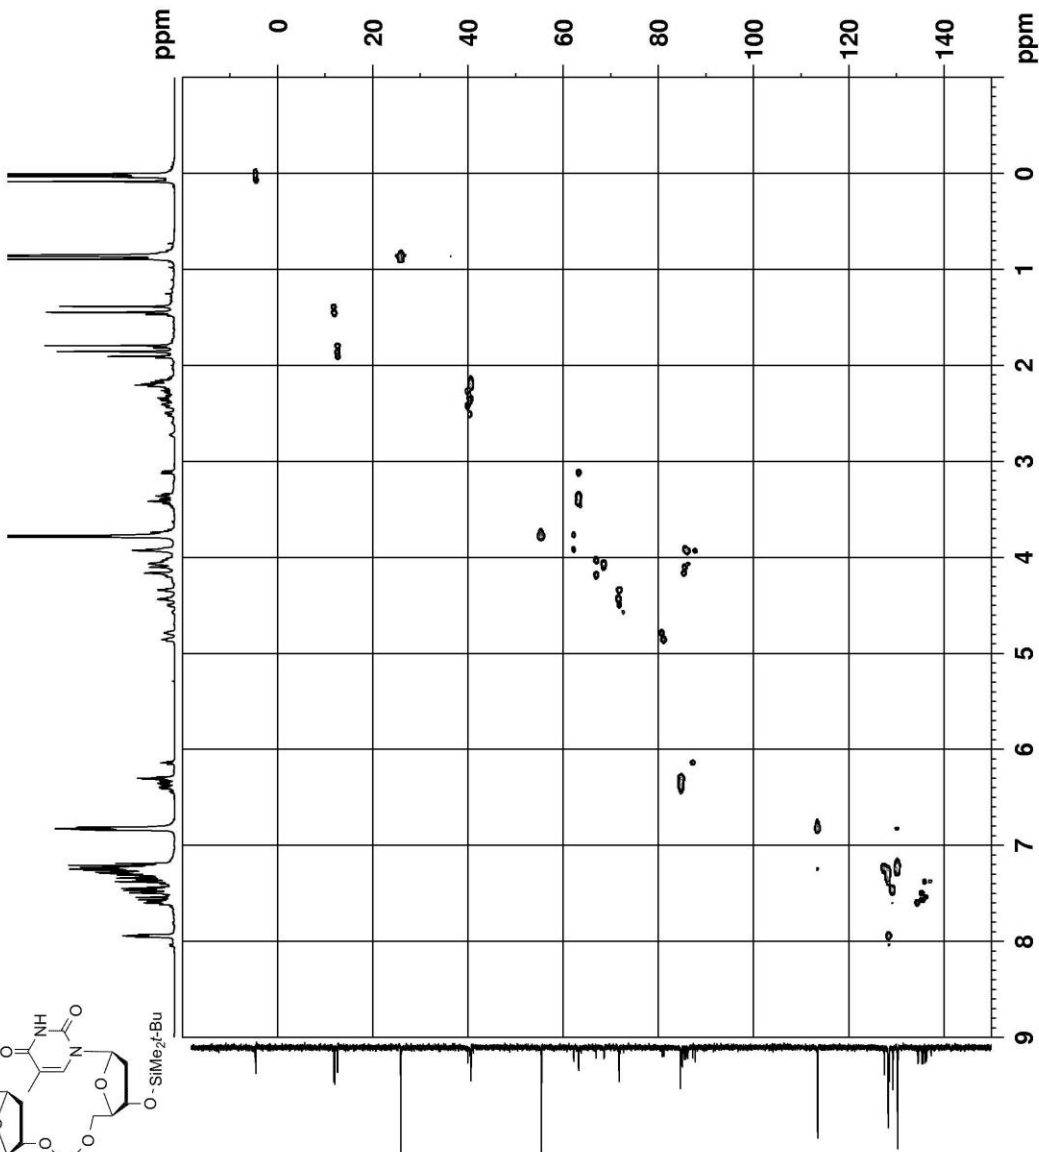

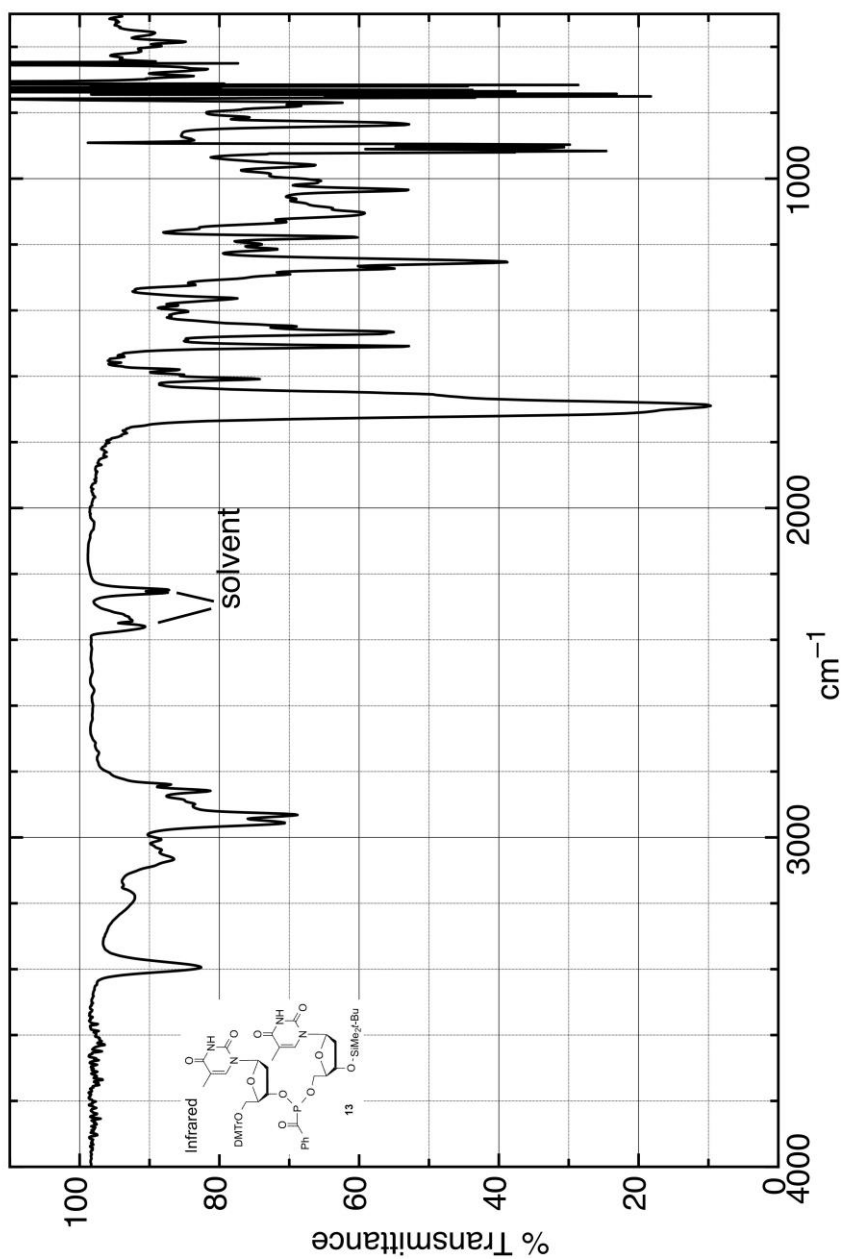



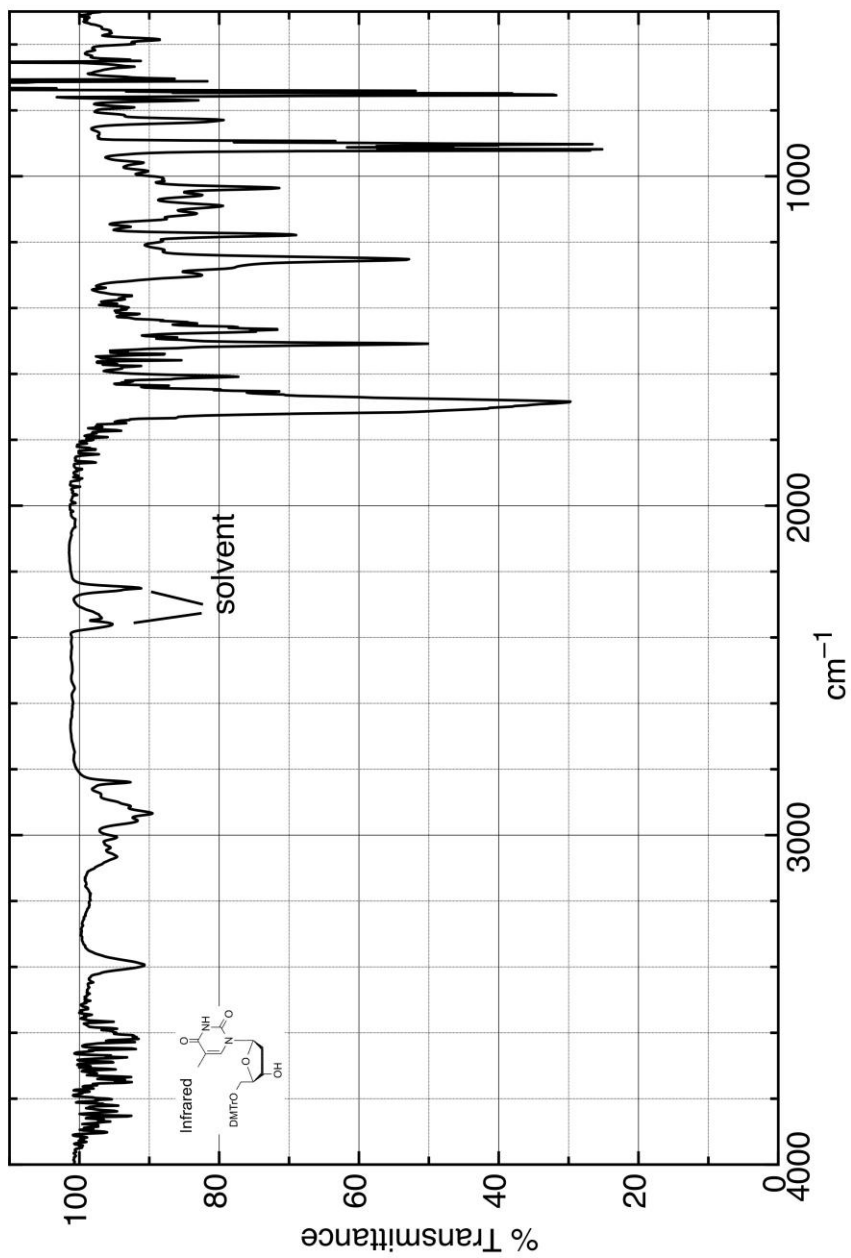

XYZ Coordinates for **7** from DFT optimization;  
E(6-311G+(2d,p))= -1078.49563987 au

| Atom<br>Number | Atomic<br>Number | Coordinates (Angstroms) |           |           |
|----------------|------------------|-------------------------|-----------|-----------|
|                |                  | X                       | Y         | Z         |
| 1              | 15               | -0.023368               | 0.169733  | -0.826094 |
| 2              | 8                | -0.734670               | 2.771713  | -0.257079 |
| 3              | 7                | 1.421462                | -0.241278 | 0.007741  |
| 4              | 7                | -1.433560               | -0.180628 | 0.076356  |
| 5              | 6                | 0.110745                | 2.055204  | -0.770891 |
| 6              | 6                | 1.954595                | 0.457598  | 1.206204  |
| 7              | 1                | 1.265477                | 1.285959  | 1.401025  |
| 8              | 6                | 1.230538                | 2.668374  | -1.604044 |
| 9              | 6                | -2.595677               | -0.749460 | -0.660859 |
| 10             | 1                | -3.379189               | -0.882476 | 0.091785  |
| 11             | 6                | -1.855706               | -1.127351 | 2.350269  |
| 12             | 1                | -2.792431               | -1.634746 | 2.091102  |
| 13             | 1                | -1.905181               | -0.875026 | 3.416413  |
| 14             | 1                | -1.036204               | -1.837205 | 2.199139  |
| 15             | 6                | 1.979011                | -0.427224 | 2.465267  |
| 16             | 1                | 0.992353                | -0.847254 | 2.677949  |
| 17             | 1                | 2.295303                | 0.163317  | 3.333244  |
| 18             | 1                | 2.686572                | -1.257599 | 2.360206  |
| 19             | 6                | -2.779004               | 1.157441  | 1.746813  |
| 20             | 1                | -2.595511               | 2.066033  | 1.170573  |
| 21             | 1                | -2.825313               | 1.416214  | 2.811931  |
| 22             | 1                | -3.758830               | 0.751448  | 1.469363  |
| 23             | 6                | 2.194976                | -1.423811 | -0.461701 |
| 24             | 1                | 3.064451                | -1.485386 | 0.199956  |
| 25             | 6                | -2.317140               | -2.137115 | -1.256476 |
| 26             | 1                | -1.558304               | -2.085880 | -2.044680 |
| 27             | 1                | -3.231916               | -2.549515 | -1.699533 |
| 28             | 1                | -1.966114               | -2.830066 | -0.485131 |
| 29             | 6                | -1.647562               | 0.143043  | 1.506400  |
| 30             | 1                | -0.723446               | 0.615459  | 1.849028  |
| 31             | 6                | 3.342222                | 1.078660  | 0.960888  |
| 32             | 1                | 4.107956                | 0.313744  | 0.789077  |
| 33             | 1                | 3.652009                | 1.658062  | 1.838532  |
| 34             | 1                | 3.331079                | 1.748489  | 0.096710  |
| 35             | 6                | -3.151826               | 0.212103  | -1.724480 |
| 36             | 1                | -3.361303               | 1.194693  | -1.291130 |
| 37             | 1                | -4.079940               | -0.183996 | -2.155062 |
| 38             | 1                | -2.434737               | 0.346880  | -2.542690 |
| 39             | 6                | 1.428934                | -2.746677 | -0.313775 |
| 40             | 1                | 1.066611                | -2.878333 | 0.711023  |
| 41             | 1                | 2.081359                | -3.593516 | -0.559514 |

|    |   |          |           |           |
|----|---|----------|-----------|-----------|
| 42 | 1 | 0.566770 | -2.784276 | -0.987567 |
| 43 | 6 | 2.733424 | -1.246437 | -1.889358 |
| 44 | 1 | 1.914131 | -1.176311 | -2.612892 |
| 45 | 1 | 3.360623 | -2.100986 | -2.170585 |
| 46 | 1 | 3.338972 | -0.337066 | -1.968068 |
| 47 | 1 | 0.787828 | 3.091280  | -2.514708 |
| 48 | 1 | 1.690793 | 3.492920  | -1.049588 |
| 49 | 1 | 1.993525 | 1.942694  | -1.892081 |

XYZ Coordinates for **8** from DFT optimization;  
E(6-311G+(2d,p))= -1231.17406507 au

| Atom<br>Number | Atomic<br>Number | Coordinates (Angstroms) |           |           |
|----------------|------------------|-------------------------|-----------|-----------|
|                |                  | X                       | Y         | Z         |
| 1              | 15               | -0.029622               | -0.290573 | 0.388031  |
| 2              | 7                | 0.331583                | 1.370506  | 0.127581  |
| 3              | 7                | -1.665212               | -0.645341 | -0.027312 |
| 4              | 6                | 0.948391                | -1.059218 | -0.988680 |
| 5              | 6                | 0.515259                | 2.018791  | -1.196116 |
| 6              | 1                | 0.261494                | 1.256220  | -1.938670 |
| 7              | 6                | -2.398183               | -1.560601 | 0.891703  |
| 8              | 1                | -3.421917               | -1.602572 | 0.507199  |
| 9              | 6                | -3.469202               | 1.043516  | -0.454945 |
| 10             | 1                | -4.234176               | 0.527592  | 0.137127  |
| 11             | 1                | -3.986613               | 1.599798  | -1.246116 |
| 12             | 1                | -2.961397               | 1.759847  | 0.197151  |
| 13             | 6                | -0.430970               | 3.213073  | -1.412570 |
| 14             | 1                | -1.476769               | 2.926987  | -1.271244 |
| 15             | 1                | -0.315832               | 3.602647  | -2.431171 |
| 16             | 1                | -0.209777               | 4.036209  | -0.722980 |
| 17             | 6                | -3.187529               | -0.907068 | -2.031617 |
| 18             | 1                | -2.496339               | -1.610535 | -2.504175 |
| 19             | 1                | -3.673304               | -0.327311 | -2.825358 |
| 20             | 1                | -3.969733               | -1.488157 | -1.530399 |
| 21             | 6                | 0.680811                | 2.191272  | 1.319254  |
| 22             | 1                | 0.898673                | 3.191351  | 0.931461  |
| 23             | 6                | -2.492367               | -1.055986 | 2.341422  |
| 24             | 1                | -1.508460               | -1.038454 | 2.821093  |
| 25             | 1                | -3.139745               | -1.718740 | 2.928592  |
| 26             | 1                | -2.912087               | -0.045719 | 2.380395  |
| 27             | 6                | -2.463810               | 0.047196  | -1.062340 |
| 28             | 1                | -1.749262               | 0.620925  | -1.657532 |
| 29             | 6                | 1.974576                | 2.429447  | -1.467459 |
| 30             | 1                | 2.313301                | 3.208932  | -0.775176 |

|    |   |           |           |           |
|----|---|-----------|-----------|-----------|
| 31 | 1 | 2.065252  | 2.833771  | -2.482869 |
| 32 | 1 | 2.642088  | 1.569402  | -1.376100 |
| 33 | 6 | -1.838643 | -2.991325 | 0.836174  |
| 34 | 1 | -1.861574 | -3.379073 | -0.187521 |
| 35 | 1 | -2.429280 | -3.662000 | 1.472369  |
| 36 | 1 | -0.799797 | -3.023443 | 1.184191  |
| 37 | 6 | -0.490264 | 2.343202  | 2.300574  |
| 38 | 1 | -1.375630 | 2.741327  | 1.794033  |
| 39 | 1 | -0.221149 | 3.029831  | 3.112482  |
| 40 | 1 | -0.757130 | 1.381892  | 2.752040  |
| 41 | 6 | 1.948122  | 1.702488  | 2.040345  |
| 42 | 1 | 1.791508  | 0.710440  | 2.477222  |
| 43 | 1 | 2.217343  | 2.390716  | 2.850957  |
| 44 | 1 | 2.793477  | 1.641553  | 1.347396  |
| 45 | 6 | 0.548557  | -1.809192 | -2.014184 |
| 46 | 1 | 1.263581  | -2.292130 | -2.674668 |
| 47 | 1 | -0.505062 | -1.966246 | -2.201659 |
| 48 | 8 | 2.340169  | -0.863668 | -0.804673 |
| 49 | 6 | 3.029303  | -1.764048 | -0.040757 |
| 50 | 8 | 2.531789  | -2.746786 | 0.458431  |
| 51 | 6 | 4.473258  | -1.344323 | 0.080382  |
| 52 | 1 | 4.903194  | -1.164968 | -0.909633 |
| 53 | 1 | 4.538705  | -0.406831 | 0.642977  |
| 54 | 1 | 5.036622  | -2.120544 | 0.599067  |

XYZ Coordinates for **18** from DFT optimization;  
Sum of electronic and thermal Free Energies(6-31G+(d))= -691.998977 au

| Atom Number | Atomic Number | Coordinates (Angstroms) |           |           |
|-------------|---------------|-------------------------|-----------|-----------|
|             |               | X                       | Y         | Z         |
| 1           | 6             | -2.395875               | 1.348909  | -0.250561 |
| 2           | 6             | -3.305990               | 0.289175  | -0.329180 |
| 3           | 6             | -2.852673               | -1.023242 | -0.180918 |
| 4           | 6             | -1.494845               | -1.272653 | 0.045765  |
| 5           | 6             | -0.567901               | -0.220820 | 0.125882  |
| 6           | 6             | -1.041285               | 1.094246  | -0.025389 |
| 7           | 15            | 1.215158                | -0.658838 | 0.419399  |
| 8           | 6             | 3.553367                | 0.041777  | -1.053137 |
| 9           | 6             | 2.026509                | 0.204764  | -1.039799 |
| 10          | 6             | 1.656013                | 0.528174  | 1.795329  |
| 11          | 1             | -2.742049               | 2.373614  | -0.364742 |
| 12          | 1             | -4.360560               | 0.487733  | -0.503957 |
| 13          | 1             | -3.552962               | -1.853029 | -0.239194 |
| 14          | 1             | -1.147473               | -2.296842 | 0.162938  |

|    |   |           |           |           |
|----|---|-----------|-----------|-----------|
| 15 | 1 | -0.351959 | 1.933442  | 0.032885  |
| 16 | 1 | 3.984167  | 0.490486  | -1.956763 |
| 17 | 1 | 3.841327  | -1.016119 | -1.034616 |
| 18 | 1 | 4.022421  | 0.530313  | -0.190679 |
| 19 | 1 | 1.756573  | 1.269799  | -1.057032 |
| 20 | 1 | 1.596510  | -0.246131 | -1.943274 |
| 21 | 1 | 2.720822  | 0.425393  | 2.032063  |
| 22 | 1 | 1.088554  | 0.264030  | 2.694096  |
| 23 | 1 | 1.453351  | 1.577912  | 1.549333  |

XYZ Coordinates for **18** transition state from DFT optimization;  
Sum of electronic and thermal Free Energies(6-31G+(d))= -691.947172 au

| Atom<br>Number | Atomic<br>Number | Coordinates (Angstroms) |           |           |
|----------------|------------------|-------------------------|-----------|-----------|
|                |                  | X                       | Y         | Z         |
| 1              | 6                | 2.834870                | 0.855352  | 0.234687  |
| 2              | 6                | 3.291750                | -0.457361 | 0.077929  |
| 3              | 6                | 2.356301                | -1.472865 | -0.150160 |
| 4              | 6                | 0.993569                | -1.189413 | -0.220144 |
| 5              | 6                | 0.521841                | 0.135172  | -0.067570 |
| 6              | 6                | 1.474714                | 1.154192  | 0.164504  |
| 7              | 15               | -1.211261               | 0.519598  | -0.172081 |
| 8              | 6                | -2.907505               | -1.648502 | 0.691271  |
| 9              | 6                | -2.448595               | -0.806549 | -0.510153 |
| 10             | 6                | -1.747138               | 2.266628  | 0.029452  |
| 11             | 1                | 3.543851                | 1.660685  | 0.413915  |
| 12             | 1                | 4.352566                | -0.684755 | 0.134037  |
| 13             | 1                | 2.688778                | -2.501371 | -0.272497 |
| 14             | 1                | 0.293032                | -2.002527 | -0.392960 |
| 15             | 1                | 1.151979                | 2.184737  | 0.289689  |
| 16             | 1                | -3.630047               | -2.411115 | 0.367984  |
| 17             | 1                | -2.062127               | -2.159287 | 1.164162  |
| 18             | 1                | -3.384740               | -1.022485 | 1.452597  |
| 19             | 1                | -3.304314               | -0.295947 | -0.969505 |
| 20             | 1                | -2.033203               | -1.451322 | -1.294621 |
| 21             | 1                | -2.831058               | 2.284109  | -0.127840 |
| 22             | 1                | -1.545628               | 2.658341  | 1.032032  |
| 23             | 1                | -1.289018               | 2.927039  | -0.714681 |

XYZ Coordinates for **19** from DFT optimization;  
Sum of electronic and thermal Free Energies(6-31G+(d))= -766.036587 au

| Atom Number | Atomic Number | Coordinates (Angstroms) |           |           |
|-------------|---------------|-------------------------|-----------|-----------|
|             |               | X                       | Y         | Z         |
| 1           | 6             | -2.332829               | 0.055021  | 1.437940  |
| 2           | 6             | -3.290100               | 0.279684  | 0.442357  |
| 3           | 6             | -2.916996               | 0.225074  | -0.902225 |
| 4           | 6             | -1.591192               | -0.054336 | -1.249886 |
| 5           | 6             | -0.619296               | -0.279242 | -0.261478 |
| 6           | 6             | -1.009530               | -0.221243 | 1.088513  |
| 7           | 15            | 1.115680                | -0.640195 | -0.806029 |
| 8           | 6             | 2.067601                | 0.734962  | 0.082548  |
| 9           | 6             | 1.611924                | -2.080081 | 0.258289  |
| 10          | 8             | 3.045519                | 0.467672  | 0.759838  |
| 11          | 6             | 1.636892                | 2.166326  | -0.180619 |
| 12          | 1             | -2.616854               | 0.097075  | 2.486675  |
| 13          | 1             | -4.320150               | 0.494524  | 0.715388  |
| 14          | 1             | -3.655643               | 0.394879  | -1.681664 |
| 15          | 1             | -1.307673               | -0.102437 | -2.298680 |
| 16          | 1             | -0.278035               | -0.389503 | 1.875496  |
| 17          | 1             | 2.673771                | -2.281415 | 0.089696  |
| 18          | 1             | 1.036429                | -2.959498 | -0.048406 |
| 19          | 1             | 1.463815                | -1.902480 | 1.327786  |
| 20          | 1             | 2.364152                | 2.854252  | 0.259292  |
| 21          | 1             | 0.646606                | 2.350259  | 0.252646  |
| 22          | 1             | 1.555374                | 2.348894  | -1.259133 |

XYZ Coordinates for **19** transition state from DFT optimization;  
Sum of electronic and thermal Free Energies(6-31G+(d))= -766.002998 au

| Atom Number | Atomic Number | Coordinates (Angstroms) |           |           |
|-------------|---------------|-------------------------|-----------|-----------|
|             |               | X                       | Y         | Z         |
| 1           | 6             | -2.989774               | 0.765051  | -0.679087 |
| 2           | 6             | -3.506502               | -0.367112 | -0.041367 |
| 3           | 6             | -2.644195               | -1.224481 | 0.647920  |
| 4           | 6             | -1.277615               | -0.945800 | 0.715989  |
| 5           | 6             | -0.742794               | 0.176661  | 0.054693  |
| 6           | 6             | -1.619274               | 1.026889  | -0.648425 |
| 7           | 15            | 1.026577                | 0.550220  | 0.110624  |
| 8           | 6             | 2.354735                | -0.621259 | -0.172889 |
| 9           | 6             | 1.551401                | 2.259579  | 0.518064  |
| 10          | 8             | 3.522774                | -0.254005 | -0.063112 |
| 11          | 6             | 1.989009                | -2.043502 | -0.557687 |
| 12          | 1             | -3.651756               | 1.436440  | -1.220293 |

|    |   |           |           |           |
|----|---|-----------|-----------|-----------|
| 13 | 1 | -4.572147 | -0.576967 | -0.078483 |
| 14 | 1 | -3.037867 | -2.100738 | 1.156927  |
| 15 | 1 | -0.625946 | -1.591314 | 1.297599  |
| 16 | 1 | -1.227132 | 1.888269  | -1.182403 |
| 17 | 1 | 2.644123  | 2.216647  | 0.576362  |
| 18 | 1 | 1.153176  | 2.581012  | 1.484519  |
| 19 | 1 | 1.270230  | 2.980497  | -0.254727 |
| 20 | 1 | 2.297413  | -2.719490 | 0.248935  |
| 21 | 1 | 2.557659  | -2.313064 | -1.454613 |
| 22 | 1 | 0.921460  | -2.178716 | -0.751557 |

XYZ Coordinates for **20** from DFT optimization;  
Sum of electronic and thermal Free Energies(6-31G+(d))= -936.138233 au

| Atom Number | Atomic Number | Coordinates (Angstroms) |           |           |
|-------------|---------------|-------------------------|-----------|-----------|
|             |               | X                       | Y         | Z         |
| 1           | 6             | -2.054739               | 0.044486  | -0.300289 |
| 2           | 6             | -2.940209               | -0.973618 | 0.436752  |
| 3           | 6             | -4.354482               | -0.822392 | 0.088488  |
| 4           | 7             | -5.473514               | -0.692587 | -0.196166 |
| 5           | 8             | -0.715862               | -0.157069 | 0.161113  |
| 6           | 15            | 0.549743                | 0.223342  | -0.890229 |
| 7           | 6             | 2.194851                | -1.760140 | -0.121028 |
| 8           | 8             | 1.762588                | -0.374544 | 0.055362  |
| 9           | 8             | 0.768444                | 1.827666  | -0.628002 |
| 10          | 6             | 0.941617                | 2.429625  | 0.686626  |
| 11          | 1             | -2.376141               | 1.066377  | -0.070372 |
| 12          | 6             | 3.679172                | -1.744192 | -0.465997 |
| 13          | 1             | 1.632212                | -2.195611 | -0.958582 |
| 14          | 6             | 1.879371                | -2.532016 | 1.155251  |
| 15          | 1             | -2.124125               | -0.106865 | -1.384949 |
| 16          | 1             | -2.830468               | -0.843861 | 1.519349  |
| 17          | 1             | -2.623123               | -1.992938 | 0.190102  |
| 18          | 6             | 0.911972                | 3.938642  | 0.525724  |
| 19          | 1             | 1.897357                | 2.090180  | 1.097187  |
| 20          | 1             | 0.135627                | 2.082099  | 1.340833  |
| 21          | 1             | 2.189290                | -3.578210 | 1.047850  |
| 22          | 1             | 4.046169                | -2.767518 | -0.606859 |
| 23          | 1             | 0.806554                | -2.509073 | 1.370993  |
| 24          | 1             | 4.255394                | -1.279126 | 0.342726  |
| 25          | 1             | 3.858506                | -1.182683 | -1.389140 |
| 26          | 1             | 2.416489                | -2.099480 | 2.007732  |
| 27          | 1             | 1.048171                | 4.414954  | 1.503946  |
| 28          | 1             | -0.046243               | 4.270960  | 0.111374  |
| 29          | 1             | 1.716107                | 4.277961  | -0.136549 |

XYZ Coordinates for **20** after rotation to opposite configuration, from DFT optimization;  
Sum of electronic and thermal Free Energies(6-31G+(d))= -936.137960 au

| Atom<br>Number | Atomic<br>Number | Coordinates (Angstroms) |           |           |
|----------------|------------------|-------------------------|-----------|-----------|
|                |                  | X                       | Y         | Z         |
| 1              | 6                | 2.038365                | -0.332346 | -0.240296 |
| 2              | 6                | 3.087921                | 0.468896  | 0.548525  |
| 3              | 6                | 4.451315                | 0.020820  | 0.257507  |
| 4              | 7                | 5.528094                | -0.343814 | 0.017209  |
| 5              | 8                | 0.752412                | 0.148930  | 0.158980  |
| 6              | 15               | -0.469082               | 0.263299  | -0.999639 |
| 7              | 6                | -1.769137               | -1.737475 | 0.390085  |
| 8              | 8                | -1.269116               | -1.154859 | -0.863489 |
| 9              | 8                | -1.476091               | 1.214423  | -0.089394 |
| 10             | 6                | -1.168394               | 2.624497  | 0.038825  |
| 11             | 1                | 2.118076                | -1.399170 | -0.005565 |
| 12             | 6                | -3.291884               | -1.751465 | 0.329960  |
| 13             | 1                | -1.435138               | -1.103132 | 1.216732  |
| 14             | 6                | -1.160049               | -3.127471 | 0.525561  |
| 15             | 1                | 2.191481                | -0.200461 | -1.318705 |
| 16             | 1                | 2.905330                | 0.360018  | 1.623658  |
| 17             | 1                | 3.006766                | 1.533670  | 0.303516  |
| 18             | 6                | -2.384660               | 3.333245  | 0.607938  |
| 19             | 1                | -0.904939               | 3.031720  | -0.946485 |
| 20             | 1                | -0.302105               | 2.736384  | 0.700578  |
| 21             | 1                | -1.508658               | -3.600495 | 1.451239  |
| 22             | 1                | -3.699301               | -2.185614 | 1.250883  |
| 23             | 1                | -0.066781               | -3.075602 | 0.557092  |
| 24             | 1                | -3.638513               | -2.355275 | -0.517218 |
| 25             | 1                | -3.686643               | -0.736653 | 0.221907  |
| 26             | 1                | -1.455285               | -3.762723 | -0.317953 |
| 27             | 1                | -2.166838               | 4.401092  | 0.726783  |
| 28             | 1                | -2.649296               | 2.924937  | 1.589570  |
| 29             | 1                | -3.247082               | 3.228355  | -0.059309 |

XYZ Coordinates for **20** transition state from DFT optimization;  
Sum of electronic and thermal Free Energies(6-31G+(d))= -936.072122 au

| Atom<br>Number | Atomic<br>Number | Coordinates (Angstroms) |           |          |
|----------------|------------------|-------------------------|-----------|----------|
|                |                  | X                       | Y         | Z        |
| 1              | 6                | 2.370958                | -0.332605 | 0.000023 |
| 2              | 6                | 3.536484                | -1.341651 | 0.000325 |
| 3              | 6                | 4.840569                | -0.675170 | 0.000196 |
| 4              | 7                | 5.865295                | -0.126270 | 0.000115 |
| 5              | 8                | 1.155797                | -1.069680 | 0.000426 |



|    |    |           |           |           |
|----|----|-----------|-----------|-----------|
| 6  | 15 | -0.536825 | -0.545341 | 0.000407  |
| 7  | 6  | -3.223424 | -0.973199 | 0.000676  |
| 8  | 8  | -2.184035 | 0.022650  | 0.000989  |
| 9  | 8  | 0.000101  | 0.997639  | -0.000165 |
| 10 | 6  | -0.767950 | 2.228594  | -0.000602 |
| 11 | 1  | 2.423502  | 0.309689  | -0.886804 |
| 12 | 6  | -4.053260 | -0.816593 | 1.273541  |
| 13 | 1  | -2.752368 | -1.970932 | 0.002711  |
| 14 | 6  | -4.049600 | -0.820113 | -1.274994 |
| 15 | 1  | 2.423697  | 0.310476  | 0.886274  |
| 16 | 1  | 3.472559  | -1.986210 | -0.883712 |
| 17 | 1  | 3.472473  | -1.985763 | 0.884681  |
| 18 | 6  | 0.213817  | 3.386153  | -0.000764 |
| 19 | 1  | -1.409293 | 2.237631  | 0.884513  |
| 20 | 1  | -1.409090 | 2.237196  | -0.885869 |
| 21 | 1  | -4.840708 | -1.578746 | -1.309858 |
| 22 | 1  | -4.845200 | -1.574380 | 1.307758  |
| 23 | 1  | -3.417420 | -0.940361 | -2.161764 |
| 24 | 1  | -4.521580 | 0.174390  | 1.310023  |
| 25 | 1  | -3.423811 | -0.935455 | 2.162437  |
| 26 | 1  | -4.518758 | 0.170334  | -1.315103 |
| 27 | 1  | -0.343179 | 4.330532  | -0.003147 |
| 28 | 1  | 0.853411  | 3.362735  | -0.889739 |
| 29 | 1  | 0.850608  | 3.365511  | 0.890284  |

---

XYZ Coordinates for **21** from DFT optimization;  
Sum of electronic and thermal Free Energies(6-31G+(d))= -842.668118 au

| Atom<br>Number | Atomic<br>Number | Coordinates (Angstroms) |           |           |
|----------------|------------------|-------------------------|-----------|-----------|
|                |                  | X                       | Y         | Z         |
| 1              | 6                | 0.417580                | 2.965013  | 0.584131  |
| 2              | 8                | -1.854501               | 2.326648  | 0.122276  |
| 3              | 1                | -0.021325               | 3.905237  | 0.930003  |
| 4              | 6                | -0.671930               | 2.036281  | 0.104336  |
| 5              | 15               | -0.234200               | 0.359015  | -0.690536 |
| 6              | 6                | 2.076795                | -0.948312 | -0.244079 |
| 7              | 8                | 1.188423                | 0.141491  | 0.130612  |
| 8              | 8                | -1.273562               | -0.595438 | 0.194031  |
| 9              | 6                | -2.430370               | -1.164635 | -0.454690 |
| 10             | 1                | 0.984150                | 2.484599  | 1.390053  |
| 11             | 6                | 3.467341                | -0.359128 | -0.453263 |
| 12             | 1                | 1.717047                | -1.377673 | -1.191180 |
| 13             | 6                | 2.031773                | -2.012664 | 0.848426  |
| 14             | 1                | 1.132742                | 3.159813  | -0.225472 |

|    |   |           |           |           |
|----|---|-----------|-----------|-----------|
| 15 | 6 | -2.878663 | -2.378034 | 0.342805  |
| 16 | 1 | -2.176721 | -1.441602 | -1.487980 |
| 17 | 1 | -3.219776 | -0.404858 | -0.488009 |
| 18 | 1 | 2.684174  | -2.855288 | 0.587872  |
| 19 | 1 | 4.178706  | -1.146032 | -0.731236 |
| 20 | 1 | 1.012475  | -2.386666 | 0.984270  |
| 21 | 1 | 3.822519  | 0.116982  | 0.468183  |
| 22 | 1 | 3.456692  | 0.393111  | -1.249421 |
| 23 | 1 | 2.372610  | -1.593265 | 1.802190  |
| 24 | 1 | -3.778320 | -2.812063 | -0.110710 |
| 25 | 1 | -3.113867 | -2.095651 | 1.374481  |
| 26 | 1 | -2.096144 | -3.144612 | 0.363668  |

---

XYZ Coordinates for **21** after rotation to opposite configuration, from DFT optimization;  
Sum of electronic and thermal Free Energies(6-31G+(d))= -842.668984 au

| Atom<br>Number | Atomic<br>Number | Coordinates (Angstroms) |           |           |
|----------------|------------------|-------------------------|-----------|-----------|
|                |                  | X                       | Y         | Z         |
| 1              | 6                | -0.203875               | -2.883460 | 0.605711  |
| 2              | 8                | -2.288031               | -1.829577 | 0.045501  |
| 3              | 1                | -0.833309               | -3.694144 | 0.983372  |
| 4              | 6                | -1.071232               | -1.791765 | 0.019087  |
| 5              | 15               | -0.207857               | -0.382810 | -0.949807 |
| 6              | 6                | 2.258944                | 0.466609  | -0.258749 |
| 7              | 8                | 1.035201                | -0.200323 | 0.157097  |
| 8              | 8                | -1.226791               | 0.881889  | -0.693503 |
| 9              | 6                | -1.755834               | 1.274144  | 0.598913  |
| 10             | 1                | 0.489900                | -3.270217 | -0.151996 |
| 11             | 6                | 2.209174                | 1.936934  | 0.149920  |
| 12             | 1                | 2.330849                | 0.394450  | -1.354175 |
| 13             | 6                | 3.421097                | -0.287633 | 0.377602  |
| 14             | 1                | 0.412596                | -2.469757 | 1.412216  |
| 15             | 6                | -2.491640               | 2.591130  | 0.423588  |
| 16             | 1                | -0.923033               | 1.374861  | 1.304831  |
| 17             | 1                | -2.430248               | 0.488949  | 0.952252  |
| 18             | 1                | 4.375615                | 0.169691  | 0.091203  |
| 19             | 1                | 3.130944                | 2.448328  | -0.153256 |
| 20             | 1                | 3.430087                | -1.334494 | 0.056135  |
| 21             | 1                | 2.106926                | 2.028068  | 1.237886  |
| 22             | 1                | 1.363926                | 2.447995  | -0.322829 |
| 23             | 1                | 3.341383                | -0.262169 | 1.470843  |
| 24             | 1                | -2.915317               | 2.911199  | 1.383559  |
| 25             | 1                | -3.309599               | 2.482887  | -0.296466 |
| 26             | 1                | -1.815692               | 3.374834  | 0.064331  |

---

XYZ Coordinates for **21** transition state from DFT optimization;  
Sum of electronic and thermal Free Energies(6-31G+(d))= -842.601643 au

| Atom<br>Number | Atomic<br>Number | Coordinates (Angstroms) |           |           |
|----------------|------------------|-------------------------|-----------|-----------|
|                |                  | X                       | Y         | Z         |
| 1              | 6                | -0.495296               | 3.064340  | 0.146405  |
| 2              | 8                | 1.842796                | 2.421002  | 0.257126  |
| 3              | 1                | -0.537962               | 3.485847  | 1.157291  |
| 4              | 6                | 0.675162                | 2.104010  | 0.067021  |
| 5              | 15               | 0.248203                | 0.420344  | -0.364057 |
| 6              | 6                | -2.065146               | -0.832641 | 0.334162  |
| 7              | 8                | -1.265434               | -0.115225 | -0.672690 |
| 8              | 8                | 1.433060                | -0.680735 | -0.578212 |
| 9              | 6                | 2.034054                | -1.350955 | 0.570492  |
| 10             | 1                | -0.312104               | 3.884990  | -0.556750 |
| 11             | 6                | -3.476388               | -0.266813 | 0.253700  |
| 12             | 1                | -1.625936               | -0.618516 | 1.317330  |
| 13             | 6                | -1.997499               | -2.325226 | 0.036178  |
| 14             | 1                | -1.450141               | 2.590396  | -0.095224 |
| 15             | 6                | 3.222689                | -2.146085 | 0.065840  |
| 16             | 1                | 1.280585                | -2.002751 | 1.030266  |
| 17             | 1                | 2.337103                | -0.590808 | 1.297488  |
| 18             | 1                | -0.966589               | -2.692094 | 0.080269  |
| 19             | 1                | -4.130162               | -0.777711 | 0.970548  |
| 20             | 1                | -2.392330               | -2.533157 | -0.964714 |
| 21             | 1                | -3.888864               | -0.407929 | -0.751758 |
| 22             | 1                | -3.484175               | 0.803656  | 0.484008  |
| 23             | 1                | -2.592642               | -2.885608 | 0.767380  |
| 24             | 1                | 3.700070                | -2.669410 | 0.903321  |
| 25             | 1                | 3.961262                | -1.482838 | -0.395788 |
| 26             | 1                | 2.910014                | -2.889352 | -0.675379 |
